# Supplementary material for: Assessment of haematological parameters in HIV-infected and uninfected Rwandan women: a cross-sectional study
Source: PubMed Central journal article supplement — BMJ Open. 2012 Nov 20;2(6):e001600. doi: 10.1136/bmjopen-2012-001600 (PMC3533001; doi:10.1136/bmjopen-2012-001600), 2012-11-20
Supplement: bmjopen-2012-001600.draft_revisions.pdf [file bmjopen-2012-001600.draft_revisions.pdf]

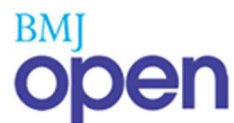

## Assessment of Hematological Parameters in HIV-Infected and Uninfected Rwandan Women

|                                 |                                                                                                                |
|---------------------------------|----------------------------------------------------------------------------------------------------------------|
| Journal:                        | <i>BMJ Open</i>                                                                                                |
| Manuscript ID:                  | bmjopen-2012-001600                                                                                            |
| Article Type:                   | Research                                                                                                       |
| Date Submitted by the Author:   | 04-Jun-2012                                                                                                    |
| Complete List of Authors:       | MUNYAZESA, Elisaphane;                                                                                         |
| <b>Primary Subject Heading</b>: | Infectious diseases                                                                                            |
| Secondary Subject Heading:      | Haematology (incl blood transfusion), Infectious diseases                                                      |
| Keywords:                       | HIV & AIDS < INFECTIOUS DISEASES, Public health < INFECTIOUS DISEASES, Tropical medicine < INFECTIOUS DISEASES |
|                                 |                                                                                                                |

SCHOLARONE™  
Manuscripts

Peer Review Only

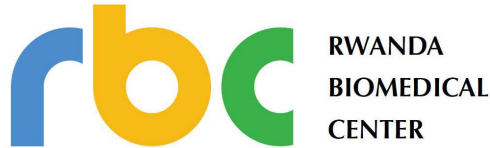Kigali, June 1<sup>st</sup>, 2012Ref. N<sup>o</sup>: NRL/2012

A Healthy People. A Wealthy Nation

National Reference Laboratory (NRL) Division

The Editor  
BMJ Open Journal

Dear Editor,

We are pleased to submit this manuscript, entitled, "*Assessment of Hematological Parameters in HIV-Infected and Uninfected Rwandan women*" for consideration for publication in *BMJ Open*.

On behalf of all other authors, I declare that the results of our manuscript nor any part of it have ever been submitted, or are under consideration elsewhere, and thus this is an original submission.

We declare that all ethical procedures and consent process were ensured before the study implementation. A written informed consent was obtained from each participant before participating in the study. The study was approved by the Rwanda National Ethics Committee, which approved research studies with international affiliations, and Montefiore Medical center, NY, US. All authors read this paper before submission, and approved it. No author declares a conflict of interest.

We thank you for your time and consideration. .

Yours sincerely,

-----  
Elizaphane Munyazesa, MSc

e-mail: [munyazesa@hotmail.com](mailto:munyazesa@hotmail.com)

Phone: +250 0783069554

# Assessment of Hematological Parameters in HIV-Infected and Uninfected Rwandan Women

Elisaphane Munyazesa MSc<sup>1</sup>; Ivan Emile, MSc<sup>2</sup>; Eugene Mutimura, PhD<sup>3</sup>; Donald R. Hoover PhD<sup>4</sup>; Qiuhi Shi, PhD<sup>5</sup>; Aileen McGinn, PhD<sup>6</sup>; Stephenson Musiime MD<sup>7</sup>; Fred Muhairwe MD<sup>8</sup>; Alfred Rutagengwa MD<sup>9</sup>; Jean Claude Dusingize, MD, MSc<sup>10</sup>, Kathryn Anastos, MD<sup>11</sup>

## AUTHOR LIST

1. Elisaphane Munyazesa MSc, Rwanda Biomedical Center (RBC), Institute of HIV/AIDS and Disease Prevention and Control (IHDPC) National Reference laboratory Division, Department of Quality Control, Kigali, Rwanda; e-mail: [munyazesa@hotmail.com](mailto:munyazesa@hotmail.com)  
Contribution: Manuscript preparation and writing  
Conflict of interest: None
2. Ivan Emile, MSc, Rwanda Biomedical Center (RBC), Institute of HIV/AIDS and Disease Prevention and Control (IHDPC) National Reference laboratory Division, Department of Laboratory Network, Kigali Rwanda; e-mail: [emil.ivank@gmail.com](mailto:emil.ivank@gmail.com)  
Contribution: Manuscript preparation and writing  
Conflict of interest: None
3. Eugene Mutimura, PhD, Women's Equity in Access to Care and Treatment (WE-ACTx), Kigali Rwanda, e-mail: [eugene.mutimura@gmail.com](mailto:eugene.mutimura@gmail.com)  
Contribution: Study design, data analysis, manuscript preparation and writing  
Conflict of interest: None
4. Donald R. Hoover PhD, Rutgers, The State University of New Jersey, New Brunswick, NJ USA  
Email: [drhoover@stat.rutgers.edu](mailto:drhoover@stat.rutgers.edu)  
Contribution: Study design, data analysis and manuscript preparation.  
Conflict of interest: None
5. Shi Qiuhi, PhD School of Health Sciences and Practice, New York Medical College, NY, USA, e-mail: [qshi@data2solutions.com](mailto:qshi@data2solutions.com)  
Contribution: Data analysis, manuscript preparation  
Conflict of interest: None
6. Aileen P. McGinn, PhD, Albert Einstein College of Medicine and Montefiore Medical Center, Bronx, NY USA, e-mail: [aileen.mcginn@einstein.edu](mailto:aileen.mcginn@einstein.edu).  
Contribution: Data analysis, manuscript preparation and writing  
Conflict of interest: None
7. Stephenson Musiime MD, King Faisal Hospital, Kigali, Rwanda, e-mail: [smusiime9@gmail.com](mailto:smusiime9@gmail.com)  
Contribution: Manuscript preparation and writing  
Conflict of interest: None
8. Fred Muhairwe MD, Byumba District Hospital, Gicumbi District, Northern Province, Rwanda, e-mail: [fredmuhairwe@yahoo.co.uk](mailto:fredmuhairwe@yahoo.co.uk)  
Contribution: Manuscript preparation and writing  
Conflict of interest: None

- 1  
2 9. Alfred Rutagengwa MD, Nyamata District Hospital, Bugesera, Rwanda, e-mail:  
3 alfar777@gmail.com  
4 Contribution: Manuscript preparation and writing  
5 Conflict of interest: None  
6
- 7 10. Jean Claude Dusingize, MD, MSc, Women's Equity in Access to Care and Treatment (WE-  
8 ACTx), Kigali Rwanda, e-mail: [dusingize@gmail.com](mailto:dusingize@gmail.com)  
9 Contribution: Manuscript preparation and writing  
10 Conflict of interest: None  
11
- 12 11. Kathryn Anastos, MD, Albert Einstein College of Medicine and Montefiore Medical Center, Bronx,  
13 NY USA, e-mail: [kathryn.anastos@gmail.com](mailto:kathryn.anastos@gmail.com)  
14 Contribution: Study design, data analysis, manuscript preparation and writing  
15 Conflict of interest: None  
16  
17  
18  
19

20 Text: 2313 words  
21 Abstract: 298 words  
22 Tables: 3  
23 Short Title: Hematological parameters in HIV+ Rwandan women  
24  
25

26 Correspondence to:

27  
28 **Elisaphane Munyazesa, MSc**  
29 Rwanda Biomedical Center, IHDPC  
30 National Reference laboratory Division,  
31 **P.O. Box 4668**  
32 **Kigali, Rwanda,**  
33 **e-mail: [munyazesa@hotmail.com](mailto:munyazesa@hotmail.com)**  
34 **Phone: +250 0783069554**  
35  
36  
37  
38  
39  
40  
41  
42  
43  
44  
45  
46  
47  
48  
49  
50  
51  
52  
53  
54  
55  
56  
57  
58  
59  
60

## Abstract

**OBJECTIVES:** Although hematologic abnormalities are common manifestations of HIV infection, few studies on hematologic parameters in HIV-infected persons have been undertaken in sub Saharan Africa. The authors assessed factors associated with hematological parameters in HIV-infected antiretroviral-naïve and HIV-uninfected Rwandan women.

**STUDY DESIGN:** cross-sectional analysis of a longitudinal cohort.

**SETTING:** Community-based women's associations.

**PARTICIPANTS:** 710 HIV-infected (HIV+) antiretroviral-naïve and 226 HIV-uninfected (HIV-) women from the Rwanda Women's Interassociation Study Assessment. Hematological parameters categorized as (abnormal vs. normal) were compared by HIV status and among HIV+ women by CD4+ count category using proportions. Multivariate logistic regression models using forward selection were fit.

**RESULTS:** Prevalence of anemia [hemoglobin (Hb) <12.0 g/dl] was higher in the HIV+ group (20.5% vs 6.3%;  $p < 0.001$ ), and increased with lower CD4 counts:  $\geq 350$  (7.6% %), 200-349 (16.0%%) and  $< 200$  cells/mm<sup>3</sup> (32.2%%). Marked anemia (Hb <10.0 g/dl) was found in 4.2% of HIV+ and none of the HIV- women ( $p < 0.001$ ), and was highest in HIV+ women with CD4+  $< 200$  cells/mm<sup>3</sup> (8.4%). The HIV+ were more likely than HIV- women (4.2 vs. 0.5% respectively,  $p = 0.002$ ) to have moderate neutropenia with WBC  $< 2.0 \times 10^3$  cells/mm<sup>3</sup> and 8.4% of HIV+ women with CD4+  $< 200$  cells/mm<sup>3</sup> had moderate neutropenia. In multivariate logistic regression analysis, BMI (OR 0.87 per kg/m<sup>2</sup>, 95% CI 0.82-0.93;  $p < 0.001$ ), CD4 200-350 vs HIV- (OR 3.59, 95% CI 1.89-6.83;  $p < 0.001$ ) and CD4  $< 200$  cells/mm<sup>3</sup> vs HIV- (OR 8.09, 95% CI 4.37-14.97;  $< 0.001$ ) had large independent associations with anemia. There were large independent associations of CD4  $< 200$  cells/mm<sup>3</sup> vs HIV- (OR 7.18, 95% CI 0.78-65.82;  $p = 0.081$ ) and cotrimoxazole and/or Dapsone use (OR 5.69, 95% CI 0.63-51.45;  $p = 0.122$ ) with moderate neutropenia.

**CONCLUSIONS:** Anemia was more common than neutropenia or thrombocytopenia in the HIV-infected Rwandan women. Future comparisons of hematological parameters in HIV infected patients before and after antiretroviral therapy initiation are warranted.

## INTRODUCTION

Acquired immunodeficiency syndrome (AIDS) is a systemic disorder caused by the human immunodeficiency virus (HIV), and characterized by severe impairment and progressive damage of both cellular and humoral immune responses. Besides immunological complications of HIV disease [1], hematological abnormalities have been documented as strong independent predictors of morbidity and mortality in HIV-infected individuals [2]. HIV replicates not only in CD4+ lymphocyte cells, but also in macrophages and dendritic cells [1, 3, 4]. Such replication is followed by immune system depression, which can lead to life-threatening opportunistic infections. Hematological complications such as mild to severe anemia are associated with HIV disease progression and subsequent reduced survival [5].

Although numerous complications occur in HIV-infected patients [2, 6, 7], the most common hematologic abnormalities are anemia and neutropenia [6]. Anemia and neutropenia are generally caused by inadequate blood cell production because of bone marrow suppression by HIV infection mediated by abnormal cytokine expression and alteration of the bone marrow microenvironment [5, 8]. Anemia in HIV-infected persons is associated with CD4 cell depletion and progression to AIDS [9] and is one of the strongest predictors of HIV mortality and poor responses to antiretroviral therapy [10]. Neutropenia is frequently observed in advanced stages of HIV infection after development of AIDS, and has been associated with certain types of antiretroviral medications used to treat HIV infection [10]. Thrombocytopenia is characterized by platelet counts below  $125 \times 10^3/\text{mm}^3$ , and also frequently occurs in HIV-infected patients [11-13]. Hematologic parameters mainly anemia and leucopenia in HIV-infected antiretroviral therapy (ART)-naïve patients result in poor ART treatment outcome and otherwise strongly predict mortality [2,14,15].

Although hematologic abnormalities are common manifestations of HIV infection and AIDS, and may have considerable impact on patients' wellbeing, treatment and care, few studies on hematologic parameters in HIV-infected persons have been undertaken in sub Saharan Africa. Such information for HIV-infected adults in Rwanda may help to inform treatment of HIV-infected individuals in this region. We therefore assessed hematological parameters in HIV-infected antiretroviral-naïve and HIV-uninfected Rwandan women.

## MATERIALS AND METHODS

### *Study Design*

Participants were from the Rwanda Women's Interassociation Study and Assessment (RWISA), a prospective observational cohort study on the effectiveness and toxicity of antiretroviral therapy (ART) that enrolled 710 HIV-infected and 226 uninfected women in 2005. Participants from RWISA were recruited from the Women's Equity in Access to Care and Treatment (WE-ACTx) clinical site in Kigali, community-based organizations, associations of people living with HIV/AIDS, and HIV Health Center clinical care sites in Kigali. Volunteers were included if they were ART naïve except for possible exposure to single-dose nevirapine to prevent mother to child HIV transmission; were  $\geq 25$  years of age, had resided in Rwanda in 1994, and if HIV negative would be willing to undergo voluntary counseling and testing for HIV at 6 month intervals. All participants provided information on medical history, demographic characteristics, psychosocial history, experience of trauma during the 1994 Rwandan genocide, and symptoms of depression and post-traumatic stress. This also includes symptoms and diagnoses that define World Health Organization (WHO) Stage-IV HIV illness. It should be noted that such symptoms are not specific to HIV infection, so some of the HIV- women also meet the criteria for Stage IV illness. A physical assessment was performed and specimens were taken for CD4 cell count, full blood count and other laboratory studies. Written informed consent was obtained from each participant in the local language (Kinyarwanda) in accordance with this study's protocols and procedures approved by the Rwanda National Ethics Committee and the Institutional Review Board of Montefiore Medical Center, Bronx, NY, USA. Details of the RWISA study procedures and informed consent process including video and individual discussion have been previously described [16].

### *Laboratory data*

CD4 T lymphocytes counts were determined using the Becton Dickinson (BD) FASCount system (Becton, Dickinson, Singapore) at the National Reference Laboratory, Kigali, Rwanda, and full blood count analyses were performed using standard automated methods at King Faisal Hospital in Kigali. Blood hemoglobin was determined by automated blood analyzer (CELL-DYN 1800). A modified Methemoglobin method was used for the colorimetric determination of hemoglobin. A portion of the lysed, diluted sample from the WBC Mixing Chamber was used for hemoglobin measurement. Blood samples were sent to the central laboratory within 2 hours



1  
2 after collection where HIV-1 status and CD4 count were assessed. Blood samples were tested  
3 for HIV using the Abbott's Combo HIV Test. White blood cell count and platelet counts were  
4 performed using automated hematological analyzer (micro Cobas; Hoffman La Roche, Basel,  
5 Switzerland).  
6  
7  
8  
9

### 10 **Statistical analysis**

11  
12 Leukocyte values, hemoglobin levels and platelet counts were analyzed as continuous variables  
13 and compared by HIV status and CD4 cell count category (<200, 200-349 and  $\geq 350/\text{mm}^3$ ) in  
14 HIV positive women. Anemia and marked anemia were defined as  $\text{Hb} < 12.0$  and  $< 10.0$  mg/dl  
15 respectively, and neutropenia was examined at two thresholds: white blood cell count  $< 2000$  and  
16  $< 1000$  cells/  $\text{mm}^3$  while thrombocytopenia was defined as platelets  $< 125.0 \times 10^3 /\text{mm}^3$  [17].  
17 Unadjusted statistical comparisons between i) categorical predictors and categorical outcomes  
18 were made using chi-square tests, and ii) categorical predictors and continuous outcomes were  
19 made using t-tests and ANOVA. Multivariate logistic regression models with anemia,  
20 neutropenia and thrombocytopenia as outcomes were fit using forward selection and a P  
21 to enter of 0.2. Statistical analyses were performed using STATA version 11.0 and SAS 9.1.3.  
22  
23  
24  
25  
26  
27  
28  
29  
30  
31

## 32 **RESULTS**

### 33 **Demographic Characteristics**

34  
35 All 936 (226 HIV- and 710 HIV+) women who participated in the RWISA study were included in  
36 this analysis. Table 1 presents characteristics of the HIV- women and the HIV+ women by CD4  
37 count category:  $\geq 350$ , 200-349 and  $< 200$  cells/ $\text{mm}^3$ . HIV-uninfected, compared to HIV+ women  
38 were older (59% Vs 22% over 40 years, respectively,  $p < 0.001$ ), and more likely to be widowed  
39 (51% Vs 42%,  $p = 0.001$ ). Less than half (41%) of HIV-infected women reported a prior WHO  
40 stage IV condition. Use of dapsone or co-trimoxazole in the prior 12 months was reported by  
41 87% of HIV+ and 19% of HIV-negative women ( $< 0.001$ ).  
42  
43  
44  
45  
46  
47  
48  
49

### 50 **Univariate Analysis of Hematologic Parameters**

51  
52 **Anemia:** Anemia was more common in HIV+ than HIV- women (20.5% vs 6.3% respectively;  
53  $p < 0.001$ ), and among HIV+ women the prevalence of anemia was higher in the lower CD4 count  
54 categories:  $\geq 350$  (7.6%) 200-349 (16.0%) and  $< 200$  (32.2%) cells/ $\text{mm}^3$  (Table 1). Marked  
55  
56  
57  
58  
59  
60



1  
2 anemia, defined as Hb<10.0 g/dL, was found in 4.2% of HIV+ and none of the HIV- women  
3 (p<0.001), again with the highest prevalence in HIV+ women with CD4<200 cells/mm<sup>3</sup> (8.4%).  
4

5 **Neutropenia:** Mean ( $\pm$  standard deviation) white blood cell count was lower in HIV+ than HIV-  
6 negative women (3.7 $\pm$ 1.4 vs 4.5 $\pm$ 1.4 X 10<sup>3</sup> cells/mm<sup>3</sup>); and among HIV+ women decreased from  
7 4.3 $\pm$ 1.6 in those with CD4  $\geq$ 350/mm<sup>3</sup> to 3.3 $\pm$ 1.4 X 10<sup>3</sup> cells/mm<sup>3</sup> in women with CD4<200/ mm<sup>3</sup>  
8 p<0.001). Neutropenia, defined as WBC<2,000 X 10<sup>3</sup> cells/mm<sup>3</sup>, was more common in HIV+  
9 than HIV- women (4.2 vs. 0.5%, p=0.006) and most prevalent in HIV+ women with CD4<200  
10 cells/mm<sup>3</sup> (8.4%, p<0.001). Only one HIV+ and one HIV- woman had profound neutropenia,  
11 defined as WBC<1,000 X 10<sup>3</sup> cells/mm<sup>3</sup>.  
12

13 **Thrombocytopenia:** Mean platelet count was lower in the HIV+ compared to HIV negative  
14 women: 223.2  $\pm$  109.0 x10<sup>3</sup>/mm<sup>3</sup> vs. 231.8 $\pm$  84.5 x10<sup>3</sup>/mm<sup>3</sup> respectively, p=0.051 with minimal  
15 differences in platelet count by category of CD4+ lymphocyte count in HIV+ women (p=0.55).  
16 Thrombocytopenia was more common in HIV+ compared to HIV- women: (13.5% vs. 8.6%,  
17 p=0.047), with no significant differences among the CD4 groups in the HIV+ women (=0.92).  
18

### 28 **Multivariate Analysis**

29 Table 2 illustrates the results of multivariate logistic regression analyses with forward selection  
30 for all participants with anemia (Hb <12.0 g/dL, neutropenia (WBC <2,000cells/mm<sup>3</sup>) and  
31 thrombocytopenia (platelets < 125/mm<sup>3</sup>) as outcomes. Body mass index (OR 0.87 per kg/mm<sup>2</sup>,  
32 95% confidence interval (CI) 0.82-0.93; p<0.001), CD4 200-350 vs. HIV- (OR 3.59, 95% CI 1.89-  
33 6.83; p<0.001) and CD4 < 200 vs HIV- (OR 8.09, 95% CI 4.37-14.97; <0.001) had large  
34 independent associations with anemia. Income had some independent association with anemia,  
35 but the trend and statistical significance across categories were not consistent. There were large  
36 independent associations of CD4 <200 cells/mm<sup>3</sup> vs. HIV- (OR 7.18, 95% CI 0.78-65.82;  
37 p=0.08) and co-trimoxazole/dapsone use (OR 5.69, 95% CI 0.63-51.45; p=0.12) with  
38 neutropenia. CD4>350 vs. HIV- (OR 2.62 cells/mm<sup>3</sup>, 95% confidence interval (CI) 1.19-5.78;  
39 p=0.02), CD4 200-350 vs. HIV- (OR 3.14, 95% CI 1.41-7.01; p=0.005) and CD4 < 200 vs HIV-  
40 (OR 2.48, 95% CI 1.09-5.64; p=0.03) had large independent associations with  
41 thrombocytopenia.  
42  
43  
44  
45  
46  
47  
48  
49  
50  
51  
52  
53  
54  
55  
56  
57  
58  
59  
60

## DISCUSSION

We assessed hemoglobin levels, white blood cell counts and platelet counts in HIV-infected antiretroviral naïve and uninfected Rwandan women, and found that greater anemia neutropenia and thrombocytopenia were all associated with HIV-positive serostatus. While anemia and neutropenia in HIV-infected women were strongly associated with lower CD4+ cell counts, thrombocytopenia was not. To that end we have compared the prevalence of abnormal hematologic parameters we observed in HIV positive women with those seen in 5 studies in sub Saharan Africa and Western World (Table 3).

Most notably, although our findings indicated that the HIV-infected women had lower mean hemoglobin and were more likely to have anemia or marked anemia than HIV-negative women, the proportions of HIV infected (as well as uninfected) women with anemia here were lower than those from prior published studies of women in sub Saharan Africa and Western Countries [18-21]. For example, the mean hemoglobin observed here of 13.1 g/dL for HIV+ and 14.5 g/dL for HIV uninfected women were each about a full point higher in both the HIV-infected and the HIV-uninfected women compared to 2056 HIV-infected (Hb 12.3 g/dL) and 569 HIV-uninfected (Hb 13.0 g/dL) participants in the Women's Interagency HIV Study (WIHS) [18]. Lower hemoglobin levels in HIV-infected than uninfected individuals are nearly universally observed, and our finding is similar to prior studies from sub Saharan Africa, e.g. HIV-infected women were more likely to be anaemic than HIV negative women (23.6% vs. 12.8%;  $p=0.031$ ) in a Ugandan study [19]. In a recent Rwandan study of 200 HIV-infected (of whom 50 were on ART) and 50 uninfected women, the prevalence of anemia was similar to our study (29.0% and 8.0% respectively) [17].

The higher hemoglobin levels in the Rwandan women, with and without HIV infection, than elsewhere may be attributable to the higher altitude of Rwanda, a mountainous country with an average of 1,700 meters above sea level and over 2,500 meters in some parts of the country [22]. The high hemoglobin observed in this cohort of Rwandan women may be due to acclimatization to higher altitude ensuring that women living in high altitude regions of Rwanda have similar physiologic adaptations as those living at lower altitude levels [23]. High altitude adaptations to fall in partial pressure of oxygen reduces the driving pressure needed for diffusion of oxygen across the alveolar-capillary barrier, and thus a fall in arterial partial pressure

1  
2 of oxygen. This results in reduction of oxygen delivery to body tissues and thus potential cellular  
3 hypoxia and organ dysfunction [24]. Thus, living in higher altitude may have resulted in a fall of  
4 arterial oxygen content and reduced oxygen tissue delivery. This may have resulted in  
5 participants' adaptation to ensure restoration of arterial oxygen saturation, which increases  
6 hemoglobin concentration in individuals who habitually reside in high altitudes areas, a principle  
7 used by endurance athletes [25].  
8  
9  
10  
11  
12

13  
14 We have reported higher prevalence of neutropenia in the HIV-infected than uninfected  
15 Rwandan women, a common finding in sub Saharan Africa [19-21]. Neutropenia may be due to  
16 HIV suppression of bone marrow resulting in abnormal granulopoiesis. Antigranulocyte  
17 antibodies have been described in HIV-infected persons [26], and neutropenia observed in HIV-  
18 infected adults may be attributed to decreased production of granulocyte colony-stimulating  
19 factor [27]. It should be noted that one study from Nigeria among HIV-infected persons found a  
20 mean WBC count that was higher than the mean values for HIV-infected women in our study  
21 [20]. This difference could be attributed to different stages of HIV illnesses in the study  
22 populations and the fact that participants in our study were ART-naïve, which was not true for  
23 the Nigerian study.  
24  
25  
26  
27  
28  
29  
30  
31  
32  
33

34 Neutropenia observed in HIV-infected women in our study was of higher prevalence in women  
35 with CD4+ lymphocyte count <200 cells/ $\mu$ L. Similarly, the Women's Interagency HIV Study  
36 found baseline neutropenia, defined as <2000 cells/mm<sup>3</sup> in 44% of women participants, and a  
37 longitudinal analysis found that worsening HIV disease was associated with subsequent  
38 neutropenia [28]. Neutropenia in an Ivory Coast study was observed in 21% of HIV-infected  
39 patients starting co-trimoxazole prophylaxis, but low grade neutropenia was not associated with  
40 adverse clinical consequences [29] as is also the case in other Sub-Saharan African countries.  
41 Neutropenia in our study is independently associated with low CD4+ lymphocyte count, and this  
42 suggests that the stage of HIV-infection is an important determinant to pre-treatment  
43 neutropenia.  
44  
45  
46  
47  
48  
49  
50  
51  
52

53 We observed a higher prevalence of thrombocytopenia (platelets  $\leq 125.0 \times 10^3 /\mu$ L) in HIV-  
54 infected compared to HIV uninfected women, but no association between thrombocytopenia and  
55 CD4 count within HIV infected women. In developed countries, thrombocytopenia is generally  
56  
57  
58  
59  
60

1  
2 infrequent in healthy asymptomatic HIV-infected patients, and is associated with very advanced  
3 HIV disease and co-morbidities [30]. However, thrombocytopenia has been shown to be one of  
4 the common hematological abnormalities in patients before HAART initiation in sub Saharan  
5 countries [10]. Although HIV-infected women in our study were HAART-naïve, the majority were  
6 asymptomatic and few reported WHO stage IV illness, and as noted may not have had  
7 advanced HIV disease.  
8  
9  
10  
11  
12

13  
14 Our study has some limitations. Its cross-sectional design makes it structurally impossible to  
15 determine temporal direction or causality. In addition, CD4 cells are a component of WBC, and  
16 thus neutropenia could be influencing low CD4 count rather than vice-versa. Secondly, all  
17 participants in this study were women, and as hemoglobin levels differ between men and  
18 women, our findings cannot be extrapolated to men. Thirdly, the higher altitude of Rwanda as a  
19 mountainous country may have influenced hemoglobin levels in our participants. Finally, the  
20 small number of women with WBC<2.0 resulted in inadequate power to assess predictors of  
21 neutropenia. It is possible, or even likely, that the large odds ratios for the associations of co-  
22 trimoxazole use (OR=5.69 CI=0.63, 51.45) and CD4 count<200 cells/ $\mu$ l (OR=7.18 CI=0.78,  
23 65.82) with neutropenia would be significant with a larger sample size.  
24  
25  
26  
27  
28  
29  
30  
31  
32  
33

34 In conclusion, we observed high prevalence of anemia in HIV-infected and uninfected Rwandan  
35 women. Anemia was more common in the HIV-infected than uninfected women, especially  
36 those with greater disease progression as indicated by lower CD4 cell counts. Neutropenia and  
37 thrombocytopenia were more common in the HIV-infected than uninfected Rwandan women. As  
38 anemia and neutropenia are the most common hematologic abnormalities in HAART-naïve HIV-  
39 infected women, it is important to routinely assess these parameters for timely and adequate  
40 clinical management.  
41  
42  
43  
44  
45  
46  
47

#### 48 **Acknowledgements:**

49 We acknowledge RWISA participants for their valuable time and commitment, and particularly  
50 acknowledge all research staff for their contribution to this study.  
51  
52

#### 53 **Funding sources:**

54 *All authors acknowledge support from the AIDS International Training and Research Program*  
55 *(Fogarty International Center, NIH D43-TW001403.) This study was supported by supplements*  
56 *from the National Institute of Allergy and Infectious Diseases to the Bronx/Manhattan Women's*  
57  
58  
59  
60

1  
2 *Interagency HIV Study (WIHS), which is funded by the National Institute of Allergy and*  
3 *Infectious (U01-AI-35004). The study was also supported in part by the Center for AIDS*  
4 *Research of the Albert Einstein College of Medicine and Montefiore Medical Center funded by*  
5 *the National Institutes of Health (NIH AI-51519) and by the National Institute of Diabetes and*  
6 *Digestive and Kidney Disease (DK54615), and the Chicago WIHS (U01-AI-34993).*  
7  
8  
9

## 10 **References**

- 11 1. Rudnicka D and Schwartz O. Intrusive HIV-1-infected cells. *Nat Immunol.* 2009;**10**: 933–  
12 34.
- 13 2. Anastos K, Shi Q, French A et al. Total Lymphocyte count, Hemoglobin and Delayed-  
14 Type Hypersensitivity as predictors of Death and AIDS Illness in HIV-1 Infected  
15 Women Receiving Highly Active Antiretroviral Therapy. *J Acquir Immune Defic Syndr.*  
16 2004;**35**:383-92.
- 17 3. Steinman RM, Granelli-Piperno A, Pope M et al. The interaction of immunodeficiency  
18 viruses with dendritic cells. *Curr Top Microbiol Immunol.* 2003;**276**:1-30.
- 19 4. Lekkerkerker AN, van Kooyk Y, Geijtenbeek TB. Viral piracy: HIV-1 targets dendritic cells  
20 for transmission. *Curr HIV Res.* 2006;**4**:169-76.
- 21 5. Obirikorang C and Yeboah FA. Blood hemoglobin measurements as a predictive  
22 indicator for the progression of HIV/ AIDS in resource-limited setting. *J Biomed Sci.*  
23 2009;**16**:102. doi:10.1186/1423-0127-16-102.
- 24 6. Ajayi AO, Ajayi EA, Fasakin KA. CD4+ T-lymphocytes cell counts in adults with human  
25 immunodeficiency virus infection at the medical department of a tertiary health  
26 institution in Nigeria. *Ann Afr Med.* 2009;**8**:257-60.
- 27 7. Coyle TE. Hematologic complications of human immunodeficiency virus infection and the  
28 acquired immunodeficiency syndrome. *Med Clin North Am.* 1997;**81**:449-70.
- 29 8. Aboulafia DM, Mitsuyasu RT. Hematologic abnormalities in AIDS. *Hematol Oncol Clin*  
30 *North Am* 1991;**5**:195.
- 31 9. Mata-Marín JA, Gaytán-Martínez JE, Martínez-Martín RE et al. Risk factors and  
32 correlates for anemia in HIV treatment-naïve infected patients: a cross-sectional  
33 analytical study. *BMC Res Notes.* 2010;**3**:230.
- 34 10. Firnhaber C, Smeaton L, Saukila N et al. Comparisons of anemia, thrombocytopenia, and  
35 neutropenia at initiation of HIV antiretroviral therapy in Africa, Asia, and the Americas.  
36 *Int J Infect Dis.* 2010;**14**: e1088-e1092.
- 37 11. Miguez-Burbano MJ, Jackson J Jr, Hadrigan S. Thrombocytopenia in HIV disease:  
38 clinical relevance, physiopathology and management. *Curr Med Chem Cardiovasc*  
39 *Hematol Agents.* 2005;**3**:365-76.
- 40 12. Kirchhoff F, Silvestri G: Is Nef the elusive cause of HIV-associated hematopoietic  
41 dysfunction? *J Clin Invest* 2008;**118**:1622-25.
- 42 13. Dilksht B, Wanchu A, Sachdeva RK et al. Profile of hematological abnormalities of Indian  
43 HIV infected individuals. *BMC Blood Disorders* 2009;**9**:5.
- 44 14. Siegfried N, Uthaman OA, Rutherford GW. Optimal time for initiation of antiretroviral  
45 therapy in asymptomatic, HIV-infected, treatment-naïve adults. *Cochrane Database*  
46  
47  
48  
49  
50  
51  
52  
53  
54  
55  
56  
57  
58  
59  
60



- 1  
2  
3 Syst Rev. 2010;**3**:CD008272.
- 4 15. Wisaksana R, Sumantri R, Indrati AR et al. Anemia and iron homeostasis in a cohort of  
5 HIV-infected patients in Indonesia. BMC Infect Dis. 2011;**11**:213.
- 6 16. Anastos K, Ndamage F, Lu D et al. Lipoprotein levels and cardiovascular risk in HIV  
7 infected and uninfected Rwandan women. AIDS Res Ther. 2010;**7**:34.
- 8 17. Masaisa F, Gahutu JB, Mukiibi J et al. Anemia in human immunodeficiency virus-infected  
9 and uninfected women in Rwanda. Am J Trop Med Hyg. 2011;**84**:456-60.
- 10 18. Levine AM, Berhane K, Masri-Lavine L et al. Prevalence and Correlates of Anemia in a  
11 Cohort of HIV-Infected Women: Women's Interagency HIV Study. JAIDS. 2001;**26**:28-  
12 35.
- 13 19. Mugisha JO, Shafer LA, Van der Paal L et al. Anaemia in a rural Ugandan HIV cohort:  
14 prevalence at enrolment, incidence, diagnosis and associated factors. Trop Med Int  
15 Health. 2008;**13**:788-94.
- 16 20. Erhabor O, Ejele OA, Nwauche CA, Buseri FI. Some hematological parameters in Human  
17 Immunodeficiency Virus (HIV) infected Africans: the Nigerian Perspective. Niger J  
18 Med. 2005;**14**:33-8.
- 19 21. Mildvan D, Creagh T, Leitz G et al. Anemia Prevalence Study Group. Prevalence of  
20 anemia and correlation with biomarkers and specific antiretroviral regimens in 9690  
21 humans-immunodeficiency-virus-infected patients: findings of the Anemia Prevalence  
22 Study. Curr Med Res Opin. 2007;**23**: 43-55.
- 23 22. Ministry of Health (MOH) [Rwanda], National Institute of Statistics of Rwanda (NISR), and  
24 ICF Macro. 2009. *Rwanda Interim Demographic and Health Survey 2007-08*.  
25 Calverton, Maryland, U.S.A.: MOH, NISR, and ICF Macro.
- 26 23. Storz JF and Moriyama H. Mechanisms of Hemoglobin Adaptation to High Altitude  
27 Hypoxia. High Alt Med Biol. 2008;**9**:148-57.
- 28 24. Windsor J and Martin D. From mountain to bedside: understanding the clinical relevance  
29 of human acclimatization to high-altitude hypoxia. Postgrad Med J. 2008;**84**:622-27.
- 30 25. Saunders PU, Pyne DB and Gore CJ. Endurance Training at Altitude. High Altitude  
31 Medicine & Biology. 2008;**10**:135-48.
- 32 26. Kimura S, Matsuda J, Ikematsu S et al. Efficacy of recombinant human granulocyte  
33 colony-stimulating factor on neutropenia in patients with AIDS. AIDS. 1990;**4**:1251-55.
- 34 27. Mauss S, Steinmetz HT, Willers R et al. Induction of granulocyte colony-stimulating factor  
35 by acute febrile infection but not by neutropenia in HIV seropositive individuals. J  
36 Acquir Immune Defic Syndr Hum Retrovirol 1997;**14**:430-34.
- 37 28. Levine A, Karim R, Mack W et al. Neutropenia in human immunodeficiency virus  
38 infection: data from the Women's Interagency HIV Study. Arch Intern Med.  
39 2006;**166**:405-10.
- 40 29. Toure S, Gabillard D, Inwoley A et al. Incidence of neutropenia in HIV-infected African  
41 adults receiving co-trimoxazole prophylaxis: a 6 year cohort study in Abidjan, Côte  
42 D'Ivoire. Trans R Soc Trop Med Hyg. 2006;**100**:785-90.
- 43  
44  
45  
46  
47  
48  
49  
50  
51  
52  
53  
54  
55  
56  
57  
58  
59  
60

- 1  
2  
3 30. Vannappagari V, Nkhoma ET, Atashili J et al. Prevalence, severity and duration of  
4 thrombocytopenia among HIV patients in the era of highly active antiretroviral therapy.  
5 Platelets. 2011;**22**:611-8.  
6  
7  
8  
9  
10  
11  
12  
13  
14  
15  
16  
17  
18  
19  
20  
21  
22  
23  
24  
25  
26  
27  
28  
29  
30  
31  
32  
33  
34  
35  
36  
37  
38  
39  
40  
41  
42  
43  
44  
45  
46  
47  
48  
49  
50  
51  
52  
53  
54  
55  
56  
57  
58  
59  
60

For peer review only



Table 1: Socio-demographic and hematologic characteristics by HIV status and CD4 cell count

| Characteristics                                                      | AMONG ALL WOMEN N (%) |                      |        | AMONG HIV+ WOMEN ONLY N (%)         |                                         |                                      | p-value |
|----------------------------------------------------------------------|-----------------------|----------------------|--------|-------------------------------------|-----------------------------------------|--------------------------------------|---------|
|                                                                      | HIV-negative (N=226)  | HIV-positive (N=710) |        | HIV+ CD4>350 cells/ $\mu$ l (N=197) | HIV+ CD4 200-349 cells/ $\mu$ l (N=268) | HIV+ CD4 <200 cells/ $\mu$ l (N=245) |         |
| <b>Age/years N (%)</b>                                               |                       |                      |        |                                     |                                         |                                      |         |
| <30                                                                  | 34 (15%)              | 158 (22%)            | <0.001 | 51 (26%)                            | 50 (19%)                                | 57 (23%)                             | 0.35    |
| 30-40                                                                | 59 (26%)              | 393 (55%)            |        | 107 (54%)                           | 151 (56%)                               | 135 (55%)                            |         |
| 40+                                                                  | 133 (59%)             | 159 (22%)            |        | 39 (20%)                            | 67 (25%)                                | 53 (22%)                             |         |
| <b>Income (Rwf)</b>                                                  |                       |                      |        |                                     |                                         |                                      |         |
| <10,000                                                              | 92 (45%)              | 251 (36%)            | 0.02   | 66 (34%)                            | 98 (37%)                                | 87 (37%)                             | 0.41    |
| 10,000- 35,000                                                       | 79 (39%)              | 347 (50%)            |        | 105 (54%)                           | 131 (50%)                               | 111 (47%)                            |         |
| >35,000                                                              | 33 (16%)              | 97 (14%)             |        | 22 (11%)                            | 35 (13%)                                | 40 (17%)                             |         |
| <b>Level of education N (%)</b>                                      |                       |                      |        |                                     |                                         |                                      |         |
| No schooling                                                         | 67 (32%)              | 156 (22%)            | 0.02   | 46 (24%)                            | 58 (22%)                                | 52 (22%)                             | 0.89    |
| Some primary school                                                  | 69 (33%)              | 269 (38%)            |        | 78 (40%)                            | 99 (37%)                                | 92 (38%)                             |         |
| Secondary or University                                              | 76 (36%)              | 277 (39%)            |        | 71 (36%)                            | 110 (41%)                               | 96 (40%)                             |         |
| <b>Marital status N (%)</b>                                          |                       |                      |        |                                     |                                         |                                      |         |
| Legally married/partner                                              | 80 (38%)              | 256 (36%)            | 0.004  | 86 (44%)                            | 97 (36%)                                | 73 (30%)                             | 0.034   |
| Widowed                                                              | 108 (51%)             | 296 (42%)            |        | 71 (36%)                            | 118 (44%)                               | 107 (44%)                            |         |
| Other                                                                | 25 (12%)              | 153 (22%)            |        | 38 (19%)                            | 53 (20%)                                | 62 (26%)                             |         |
| <b>Body Mass Index (kg/m<sup>2</sup>)</b>                            |                       |                      |        |                                     |                                         |                                      |         |
| Mean $\pm$ SD                                                        | (21.3 $\pm$ 3.8%)     | (21.6 $\pm$ 3.9%)    | 0.22   | (21.9 $\pm$ 3.9%)                   | (21.9 $\pm$ 3.9%)                       | (21.1 $\pm$ 3.7%)                    | 0.15    |
| <b>Alcohol use N (%)</b>                                             | 56 (28%)              | 144 (21%)            | 0.04   | 39 (21%)                            | 53 (21%)                                | 52 (22%)                             | 0.98    |
| <b>Smoking N (%)</b>                                                 |                       |                      |        |                                     |                                         |                                      |         |
| Yes                                                                  | 7 (3%)                | 18 (3%)              | 0.58   | 4 (2%)                              | 7 (3%)                                  | 7 (3%)                               | 0.86    |
| <b>WHO stage 4 N (%)</b>                                             |                       |                      |        |                                     |                                         |                                      |         |
| Yes                                                                  | 32 (14%)              | 288 (41%)            | <0.001 | 59 (30%)                            | 105 (39%)                               | 124 (51%)                            | <0.001  |
| <b>Co-trimoxazole/Dapsone use in prior year N (%)</b>                |                       |                      |        |                                     |                                         |                                      |         |
| Yes                                                                  | 41 (19%)              | 612 (87%)            | <0.001 | 145 (75%)                           | 247 (92%)                               | 220 (91%)                            | <0.001  |
| <b>Employed N (%)</b>                                                |                       |                      |        |                                     |                                         |                                      |         |
| Yes                                                                  | 51 (25%)              | 171 (25%)            | 0.99   | 50 (26%)                            | 63 (24%)                                | 58 (25%)                             | 0.84    |
| <b>Hemoglobin (g/dl.)</b>                                            |                       |                      |        |                                     |                                         |                                      |         |
| N                                                                    | 223                   | 669                  | <0.001 | 180                                 | 251                                     | 238                                  | <0.001  |
| Mean $\pm$ SD                                                        | 14.3 $\pm$ 1.4        | 13.1 $\pm$ 1.6       |        | 13.5 $\pm$ 1.3                      | 13.1 $\pm$ 1.7                          | 12.7 $\pm$ 1.7                       |         |
| <b>Anemia N (%)</b>                                                  | 14 (6.3%)             | 137 (20.5%)          |        | 15 (7.6%)                           | 43 (16.0%)                              | 79 (32.2%)                           | <0.001  |
| <b>Marked anemia</b>                                                 | 0                     | 28 (4.2%)            | <0.001 | 4 (1.1%)                            | 6 (2.4%)                                | 20 (8.4%)                            | <0.001  |
| <b>White blood cell count, X 10<sup>3</sup> cells/mm<sup>3</sup></b> |                       |                      |        |                                     |                                         |                                      |         |
| N                                                                    | 223                   | 670                  |        | 181                                 | 251                                     | 238                                  |         |
| Mean $\pm$ SD                                                        | 4.5 $\pm$ 1.4         | 3.7 $\pm$ 1.4        | <0.001 | 4.3 $\pm$ 1.6                       | 3.8 $\pm$ 1.3                           | 3.3 $\pm$ 1.4                        | <0.001  |
| <b>Neutropenia N (%)</b>                                             |                       |                      |        |                                     |                                         |                                      |         |
| <2000 cells/mm <sup>3</sup>                                          | 1 (0.45%)             | 28 (4.2%)            | 0.006  | 2 (1.1%)                            | 6 (2.4%)                                | 20 (8.4%)                            | <0.001  |
| <1000 cells/mm <sup>3</sup>                                          | 1 (0.45%)             | 1 (0.15%)            |        |                                     |                                         |                                      |         |
| <b>Platelet count (X10<sup>3</sup>/mm<sup>3</sup>)</b>               |                       |                      |        |                                     |                                         |                                      |         |
| N                                                                    | 208                   | 654                  | 0.05   | 179                                 | 246                                     | 229                                  | 0.55    |
| Mean $\pm$ SD                                                        | 231.8 $\pm$ 84.5      | 223.2 $\pm$ 109.0    |        | 225.9 $\pm$ 106.7                   | 222.9 $\pm$ 109.9                       | 221.4 $\pm$ 110.3                    |         |
| <b>Thrombocytopenia</b>                                              | 18 (8.6%)             | 88 (13.5%)           | 0.0547 | 24 (13.4%)                          | 36 (14.6%)                              | 31 (13.5%)                           | 0.92    |

SD=Standard Deviation; WHO=World Health Organization; Anemia is defined as hemoglobin<12.0 g/dL; Marked anemia is defined as hemoglobin<10.0 g/dL; Thrombocytopenia is defined as platelet counts <125.0 X 10<sup>3</sup> /mm<sup>3</sup>. The HIV+ and HIV- women were compared using chi-square (X<sup>2</sup>) test, and similarly CD4+ cell count categories within HIV+ women were compared the X<sup>2</sup> test. Rwf=Rwandan Francs

Table 2: Multivariate Logistic Models with Forward Selection<sup>1</sup> for all women

| Outcomes                                                                              | Characteristics               | OR (95% C.I.)      | p-value |
|---------------------------------------------------------------------------------------|-------------------------------|--------------------|---------|
| <b>Hemoglobin (g/dl) &lt; 12 g/dl (Anemia)</b>                                        |                               |                    |         |
|                                                                                       | CD4 > 350 vs HIV-             | 1.47 (0.68, 3.21)  | 0.33    |
|                                                                                       | CD4 200-350 vs HIV-           | 3.59 (1.89, 6.83)  | < 0.001 |
|                                                                                       | CD4 <200 vs HIV-              | 8.09 (4.37, 14.97) | <0.001  |
|                                                                                       | Income 10-35 K vs <10 K       | 0.68 (0.45, 1.03)  | 0.07    |
|                                                                                       | Income >35 K vs <10 K         | 0.94 (0.52, 1.70)  | 0.85    |
|                                                                                       | BMI (kg/m <sup>2</sup> )      | 0.87 (0.82, 0.93)  | <0.001  |
| <b>WBC &lt; 2000 (Neutropenia)</b>                                                    |                               |                    |         |
|                                                                                       | CD4 > 350 vs HIV-             | 1.03 (0.08, 13.15) | 0.98    |
|                                                                                       | CD4 200-350 vs HIV-           | 1.86 (0.18, 18.85) | 0.60    |
|                                                                                       | CD4 <200 vs HIV-              | 7.18 (0.78, 65.82) | 0.08    |
|                                                                                       | Co-trimoxazole or dapsone use | 5.69 (0.63, 51.45) | 0.12    |
| <b>Platelet count (X 10<sup>3</sup> / mm<sup>3</sup>) &lt; 125 (Thrombocytopenia)</b> |                               |                    |         |
|                                                                                       | CD4 > 350 vs HIV-             | 2.62 (1.19, 5.78)  | 0.02    |
|                                                                                       | CD4 200-350 vs HIV-           | 3.14 (1.41, 7.01)  | 0.005   |
|                                                                                       | CD4 <200 vs HIV-              | 2.48 (1.09, 5.64)  | 0.03    |
|                                                                                       | Age Per 5-year                | 1.20 (1.03, 1.39)  | 0.01    |
|                                                                                       | Widowed vs married/partner    | 0.49 (0.29, 0.80)  | 0.005   |
|                                                                                       | Other vs married/partner      | 0.59 (0.32, 1.07)  | 0.08    |
|                                                                                       | BMI (kg/m <sup>2</sup> )      | 0.95 (0.89, 1.00)  | 0.06    |
|                                                                                       | Co-trimoxazole or dapsone use | 0.73 (0.40, 1.32)  | 0.30    |

Among all non-hematological Variables in Table 1 and CD4 count category, p to enter = 0.20; Income is in Rwandan Francs;

**Table 3: Prevalence of anemia, neutropenia and thrombocytopenia in HIV-infected women in 5 studies**

| Study (N)                                    | Anemia  |         |         | Neutropenia |          | Thrombocytopenia  |
|----------------------------------------------|---------|---------|---------|-------------|----------|-------------------|
|                                              | Hb<12.0 | Hb<11.0 | Hb<10.0 | WBC<2000    | WBC<1000 | Platelets<125,000 |
| RWISA (710)<br>[Rwanda]                      | 20.3%   |         | 4.9%    | 4.2%        | 0.1%     | 13.5%             |
| WIHS* (2059)<br>[North America]              | 37.0%   |         | 7.2%    | 44%         | 7%       | 14.6%             |
| Uganda** (123)                               |         | 23.6%   |         |             |          |                   |
| APS*** (2197)<br>[North America]             | 32.3%   |         | 6.8%    |             |          |                   |
| PEARLS****<br>[Africa, Asia<br>and Americas] |         |         |         |             | ~15%     |                   |

\*WIHS=Women's Interagency HIV Study<sup>18,26</sup>; \*\*Uganda<sup>19</sup>; \*\*\*APS=Anemia Prevalence Study<sup>21</sup>; \*\*\*\*PEARLS=Prospective Evaluation of ART in Resource Limited Settings<sup>10</sup>

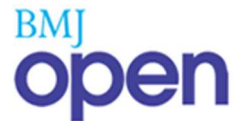

## Assessment of Hematological Parameters in HIV-Infected and Uninfected Rwandan Women: a cross-sectional study

|                                 |                                                                                                                                                                                                                                                                                                                                                                                                                                                                                                                                                                                                                                                                                                                                                                                                                                                                                                                                                                                                                                                               |
|---------------------------------|---------------------------------------------------------------------------------------------------------------------------------------------------------------------------------------------------------------------------------------------------------------------------------------------------------------------------------------------------------------------------------------------------------------------------------------------------------------------------------------------------------------------------------------------------------------------------------------------------------------------------------------------------------------------------------------------------------------------------------------------------------------------------------------------------------------------------------------------------------------------------------------------------------------------------------------------------------------------------------------------------------------------------------------------------------------|
| Journal:                        | <i>BMJ Open</i>                                                                                                                                                                                                                                                                                                                                                                                                                                                                                                                                                                                                                                                                                                                                                                                                                                                                                                                                                                                                                                               |
| Manuscript ID:                  | bmjopen-2012-001600.R1                                                                                                                                                                                                                                                                                                                                                                                                                                                                                                                                                                                                                                                                                                                                                                                                                                                                                                                                                                                                                                        |
| Article Type:                   | Research                                                                                                                                                                                                                                                                                                                                                                                                                                                                                                                                                                                                                                                                                                                                                                                                                                                                                                                                                                                                                                                      |
| Date Submitted by the Author:   | 01-Aug-2012                                                                                                                                                                                                                                                                                                                                                                                                                                                                                                                                                                                                                                                                                                                                                                                                                                                                                                                                                                                                                                                   |
| Complete List of Authors:       | MUNYAZESA, Elisaphane; Rwanda Biomedical Center (RBC), National Reference Division, Department of Laboratory Networks<br>Emile, Ivan; Rwanda Biomedical Center (RBC), National Reference Division, Department of Laboratory Networks<br>Mutimura, Eugene; Women's Equity in Access to Care and Treatment, Research and Scientific Capacity Building<br>Hoover, Donald; The State University of New Jersey, Department of Statistics<br>Shi, Qiuhe; School of Health Sciences and Practice, New York Medical College<br>McGinn, Aileen; Albert Einstein College of Medicine and Montefiore Medical College Center,<br>Musiime, Stephenson; Rwanda Biomedical Center (RBC), King Faisal Hospital, Kigali<br>Muhairwe, Fred; Byumba District Hospital, North Province,<br>Rutagengwa, Alfred; Nyamata District Hospital, Bugesera, Eastern Province<br>Dusingize, Jean; Women's Equity in Access to Care and Treatment, Research and Scientific Capacity Building<br>Anastos, Kathryn; Albert Einstein College of Medicine and Montefiore Medical Center, Bronx, |
| <b>Primary Subject Heading</b>: | Infectious diseases                                                                                                                                                                                                                                                                                                                                                                                                                                                                                                                                                                                                                                                                                                                                                                                                                                                                                                                                                                                                                                           |
| Secondary Subject Heading:      | Haematology (incl blood transfusion), Infectious diseases                                                                                                                                                                                                                                                                                                                                                                                                                                                                                                                                                                                                                                                                                                                                                                                                                                                                                                                                                                                                     |
| Keywords:                       | HIV & AIDS < INFECTIOUS DISEASES, Public health < INFECTIOUS DISEASES, Tropical medicine < INFECTIOUS DISEASES                                                                                                                                                                                                                                                                                                                                                                                                                                                                                                                                                                                                                                                                                                                                                                                                                                                                                                                                                |
|                                 |                                                                                                                                                                                                                                                                                                                                                                                                                                                                                                                                                                                                                                                                                                                                                                                                                                                                                                                                                                                                                                                               |

SCHOLARONE™  
Manuscripts

Kigali, July 30<sup>th</sup>, 2012Ref. N<sup>o</sup>: NRL/2012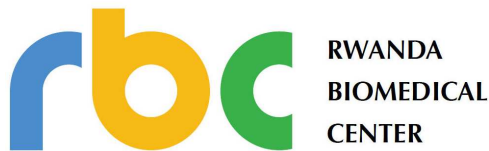

A Healthy People. A Wealthy Nation

National Reference Laboratory (NRL) Division

The Managing Editor  
BMJ Open Journal

Dear Editor:

On behalf of my co-authors I thank the reviewers and editors for their thoughtful review and suggestions. I am attaching a revised manuscript that incorporates the reviewers' and editor's suggestions and requests. These are delineated below:

**Managing Editor:**

Suggestion: Change Title to **Assessment of Hematological Parameters in HIV-Infected and Uninfected Rwandan Women: A Cross Sectional Study**. Please include the study design in the title

**Response: We have changed the title as suggested above and also indicated in the manuscript**

**Reviewer 1:**

1. Suggestion: The exact altitude of the study sites (around 1,500 m) should be stated.

**Response: we have changed the manuscript as suggested, page 8, paragraph 3**

2. Specify the automated hematology analyzer for full blood count.

**Response: This has been clarified in the Methods section, page 5, paragraph 2.**

3. HIV- women cannot meet the criteria for Stage IV illness; the statement should read as follows: "It should be noted that such symptoms are not specific to HIV infection and are encountered in some of the HIV-women".

**Response: In keeping with Reviewer 2's request that the AIDS-defining symptoms in HIV-uninfected women not be included, we have removed reference to these symptoms in the HIV-negative women, both in the text and in the tables.**

4. Table 1: Give full WHO reference for definition of anemia and marked anemia.

**Response: We have provided references for anemia (World Health Organisation: Nutritional Anemia: report of a WHO Scientific Group. Geneva, Switzerland: World Health Organisation; 1968) and marked anemia (Laboratory values of clinical importance. In Petersdorf RG, Adams RD, Braunwald E, et al., eds. Harrison's principles of internal medicine, 10th ed. New York, McGraw-Hill, 1983:A-3.)**

**2. Odds Ratio for BMI:** remove the units in the abstract and in the results section; an Odds Ratio does not have units because it is a ratio between two compared groups.

1 **Response:** We apologize for creating confusion with this variable. BMI was analyzed as a continuous  
2 variable, with the OR describing the difference attributable to each change of 1 unit of BMI in kg/m<sup>2</sup>—e.g.  
3 comparison is between a person with 1 kg/m<sup>2</sup> greater than the other person. We have corrected this in  
4 Table 2 such that it now says “BMI (per kg/ m<sup>2</sup>)”. Thus the statement in the text is correct. “BMI (OR 0.87  
5 per kg/m<sup>2</sup>, 95% CI 0.82-0.93; p<0.001).  
6

7 **3. Reviewer comment:** The effect of altitude on hemoglobin concentration is variable and population-  
8 dependent, particularly at moderate altitude. Nutrition also intervenes; this is to be considered because the  
9 study cohort is from the capital city and is likely to have a better nutritional status than the population in the  
10 countryside.  
11

12 **Response:** We thank the reviewer for this suggestion. We have added a statement to the discussion, 2<sup>nd</sup>  
13 paragraph (page 8) commenting on nutritional status as a possible contributor to anemia, and our finding of  
14 an inverse relationship of BMI with anemia.  
15  
16

17 **4. Reviewer comment:** The statements on the relationship between WBC and CD4 lymphocytes and the  
18 effect of altitude on hemoglobin concentration are self-evident and should be removed from limitations.  
19

20 **Response:** We have removed these statements from the text.  
21

22 **5. Reviewer comment:** Throughout the text, correct the spelling as follows: sub-Saharan; naive;  
23 leukopenia  
24

25 **Response:** We have corrected these throughout the manuscript.  
26  
27  
28  
29

30 **Reviewer 2:** Laura M Smeaton  
31 Senior Biostatistician  
32 Center for Biostatistics in AIDS Research  
33 Harvard School of Public Health  
34 Boston, MA USA  
35

36 **1. Reviewer comment:** Please check the cross references for the following statements from the methods  
37 section: "Anemia .. is one of the strongest predictors of HIV mortality and poor  
38 responses to antiretroviral therapy [10]. Neutropenia is frequently observed in advanced stages  
39 of HIV infection after development of AIDS, and has been associated with certain types of  
40 antiretroviral medications used to treat HIV infection [10]. " Reference #10: Firnhaber, et. al. does not report  
41 these results, and therefore cannot serve as a primary reference to these statements.  
42  
43

44 **Response:** We have corrected the references and thank the reviewer for noting this error.  
45

46 **2. Reviewer comment:** The methods section states the following: "This also includes symptoms and  
47 diagnoses that define World Health Organization (WHO) Stage-IV HIV illness. It should be noted that such  
48 symptoms are not specific to HIV infection, so some of the HIV- women also meet the criteria for Stage IV  
49 illness." However, the WHO guidelines state that these stages are defined only among those who are HIV  
50 positive. From INTERIM WHO CLINICAL STAGING OF HIV/AIDS AND HIV/AIDS CASE DEFINITIONS  
51 FOR SURVEILLANCE AFRICAN REGION (2005 - which is the date of this study), the definition is as  
52 follows: (Interim African Region version for persons aged 15 years or more with positive HIV antibody test or  
53 other laboratory evidence of HIV infection) b TABLE 1. REVISED WHO CLINICAL STAGING OF HIV/AIDS  
54 FOR ADULTS AND ADOLESCENTS (see <http://www.who.int/hiv/pub/guidelines/clinicalstaging.pdf>). The  
55 WHO guidelines from 2007 reiterate the same :  
56 <http://www.who.int/hiv/pub/guidelines/HIVstaging150307.pdf>. Therefore HIV- women should be undefined  
57 for WHO-HIV clinical stage.  
58  
59  
60

**Response:** In response to this comment and to comment 3 from reviewer 1, we have removed from the text and tables all statements referring to Stage IV indicator illnesses in the HIV-negative women.

**3. Reviewer comment:** Groups of women being compared changes between the univariate and multivariate models. The univariate models compare HIV+ to HIV-, and then separately compare among CD4 count groups within the HIV+ subgroup. Then the multivariate models make 3 pairwise comparisons between each CD4 group within HIV+ to the reference group of HIV-. The methods did not state what motivated this change in parameterization for the groups being compared. This should be explained in the methods section.

**Response:** In Table 1 we want to 1) first identify if there are overall differences between HIV+ women and 2) then identify if among HIV+ women there are trends with CD4 count among the HIV+ women in order to try have some separation in evaluating potential confounders that are associated with HIV infection as opposed to those associated with progression to more advanced HIV disease once the person is infected. The multivariate models are specifically targeting severity of HIV infection as opposed to uninfected to assess a causal effect of severity of HIV infection and quantify thresholds of increased risk. If we were to fit two multivariate models ... HIV+ Vs. HIV- and then severity of CD4 among HIV+ as was done in Table 1, this would be much more difficult to follow and we believe would blunt the interpretation of the results.

**4. Reviewer Comment:** Were potential confounders (e.g. covariates such as age) assessed for effect modification on the estimated associations of HIV status?

**Response:** With 3 levels of CD4, > 20 degrees of freedom for potential confounders and 3 outcomes, examination of such effect modifications would be extremely complicated and could lead to Type-1 error due to multiple comparisons. As we did not find a scientific basis in the literature as to why effect modifications should occur between HIV status and other factors. We thus feel that it is better to not explore this in the analyses presented in this paper.

Again, we thank the editor and reviewers for their time and commitment.

Sincerely,

-----  
Elizaphane Munyazesa, MSc

e-mail: [munyazesa@hotmail.com](mailto:munyazesa@hotmail.com)

Phone: +250 0783069554



## Assessment of Hematological Parameters in HIV-Infected and Uninfected Rwandan Women: a cross-sectional study

Elisaphane Munyazesa MSc<sup>1</sup>; Ivan Emile, MSc<sup>2</sup>; Eugene Mutimura, PhD<sup>3</sup>; Donald R. Hoover PhD<sup>4</sup>; Qiuhu Shi, PhD<sup>5</sup>; Aileen McGinn, PhD<sup>6</sup>; Stephenson Musiime MD<sup>7</sup>; Fred Muhairwe MD<sup>8</sup>; Alfred Rutagengwa MD<sup>9</sup>; Jean Claude Dusingize, MD, MSc<sup>10</sup>; Kathryn Anastos, MD<sup>11</sup>

### AUTHOR LIST

1. Elisaphane Munyazesa MSc, Rwanda Biomedical Center (RBC), Institute of HIV/AIDS and Disease Prevention and Control (IHDP) National Reference laboratory Division, Department of Quality Control, Kigali, Rwanda; e-mail: [munyazesa@hotmail.com](mailto:munyazesa@hotmail.com)  
Contribution: Manuscript preparation and writing  
Conflict of interest: None
2. Ivan Emile, MSc, Rwanda Biomedical Center (RBC), Institute of HIV/AIDS and Disease Prevention and Control (IHDP) National Reference laboratory Division, Department of Laboratory Network, Kigali Rwanda; e-mail: [emil.ivank@gmail.com](mailto:emil.ivank@gmail.com)  
Contribution: Manuscript preparation and writing  
Conflict of interest: None
3. Eugene Mutimura, PhD, Women's Equity in Access to Care and Treatment (WE-ACTx), Kigali Rwanda, e-mail: [eugene.mutimura@gmail.com](mailto:eugene.mutimura@gmail.com)  
Contribution: Study design, data analysis, manuscript preparation and writing  
Conflict of interest: None
4. Donald R. Hoover PhD, Rutgers, The State University of New Jersey, New Brunswick, NJ USA  
Email: [drhoover@stat.rutgers.edu](mailto:drhoover@stat.rutgers.edu)  
Contribution: Study design, data analysis and manuscript preparation.  
Conflict of interest: None
5. ~~Shi~~ Qiuhu Shi, PhD School of Health Sciences and Practice, New York Medical College, NY, USA, e-mail: [qshi@data2solutions.com](mailto:qshi@data2solutions.com)  
Contribution: Data analysis, manuscript preparation  
Conflict of interest: None
6. Aileen P. McGinn, PhD, Albert Einstein College of Medicine and Montefiore Medical Center, Bronx, NY USA, e-mail: [aileen.mcginn@einsein.edu](mailto:aileen.mcginn@einsein.edu)  
Contribution: Data analysis, manuscript preparation and writing  
Conflict of interest: None
7. Stephenson Musiime MD, King Faisal Hospital, Kigali, Rwanda, e-mail: [smusiime9@gmail.com](mailto:smusiime9@gmail.com)  
Contribution: Manuscript preparation and writing  
Conflict of interest: None
8. Fred Muhairwe MD, Byumba District Hospital, Gicumbi District, Northern Province, Rwanda, e-mail: [fredmuhairwe@yahoo.co.uk](mailto:fredmuhairwe@yahoo.co.uk)  
Contribution: Manuscript preparation and writing  
Conflict of interest: None

- 1  
2  
3  
4  
5  
6  
7  
8  
9 9. Alfred Rutagengwa MD, Nyamata District Hospital, Bugesera, Rwanda, e-mail:  
10 [alfar777@gmail.com](mailto:alfar777@gmail.com)  
11 Contribution: Manuscript preparation and writing  
12 Conflict of interest: None
- 13 10. Jean Claude Dusingize, MD, MSc, Women's Equity in Access to Care and Treatment (WE-  
14 ACTx), Kigali Rwanda, e-mail: [dusingize@gmail.com](mailto:dusingize@gmail.com)  
15 Contribution: Manuscript preparation and writing  
16 Conflict of interest: None
- 17  
18 11. Kathryn Anastos, MD, Albert Einstein College of Medicine and Montefiore Medical Center, Bronx,  
19 NY USA, e-mail: [kathryn.anastos@gmail.com](mailto:kathryn.anastos@gmail.com)[kanastos@montefiore.org](mailto:kanastos@montefiore.org)  
20 Contribution: Study design, [obtained funding](#), data analysis, manuscript preparation and writing  
21 Conflict of interest: None

22  
23 Text: [23462313](#) words  
24 Abstract: [300298](#) words  
25 Tables: 3  
26 Short Title: Hematological parameters in HIV+ Rwandan women

27 Correspondence to:

28  
29 **Elisaphane Munyazesa, MSc**  
30 Rwanda Biomedical Center, IHDP  
31 National Reference laboratory Division,  
32 **P.O. Box 4668**  
33 **Kigali, Rwanda,**  
34 **e-mail: [munyazesa@hotmail.com](mailto:munyazesa@hotmail.com)**  
35 **Phone: +250 0783069554**

## Abstract

**OBJECTIVES:** Although hematologic abnormalities are common manifestations of HIV infection, few studies on hematologic parameters in HIV-infected persons have been undertaken in sub Saharan Africa. The authors assessed factors associated with hematological parameters in HIV-infected antiretroviral-naïve and HIV-uninfected Rwandan women.

**STUDY DESIGN:** cross-sectional analysis of a longitudinal cohort.

**SETTING:** Community-based women's associations.

**PARTICIPANTS:** 710 HIV-infected (HIV+) antiretroviral-naïve and 226 HIV-uninfected (HIV-) women from the Rwanda Women's Interassociation Study Assessment. Hematological parameters categorized as (abnormal vs. normal) were compared by HIV status and among HIV+ women by CD4+ count category using proportions. Multivariate logistic regression models using forward selection were fit.

**RESULTS:** Prevalence of anemia [hemoglobin (Hb) <12.0 g/dl] was higher in the HIV+ group (20.5% vs 6.3%;  $p < 0.001$ ), and increased with lower CD4 counts:  $\geq 350$  (7.6% %), 200-349 (16.0%%) and <200 cells/mm<sup>3</sup> (32.2%%). Marked anemia (Hb <10.0 g/dl) was found in 4.2% of HIV+ and none of the HIV- women ( $p < 0.001$ ), and was highest in HIV+ women with CD4+ <200 cells/mm<sup>3</sup> (8.4%). The HIV+ were more likely than HIV- women (4.2 vs. 0.5% respectively,  $p = 0.002$ ) to have moderate neutropenia with WBC <2.0 X10<sup>3</sup> cells/mm<sup>3</sup> and 8.4% of HIV+ women with CD4+ <200 cells/mm<sup>3</sup> had moderate neutropenia. In multivariate logistic regression analysis, BMI (OR 0.87 per kg/m<sup>2</sup>, 95% CI 0.82-0.93;  $p < 0.001$ ), CD4 200-350 vs HIV- (OR 3.59, 95% CI 1.89-6.83;  $p < 0.001$ ) and CD4 <200 cells/mm<sup>3</sup> vs HIV- (OR 8.09, 95% CI 4.37-14.97;  $p < 0.001$ ) had large independent associations with anemia. There were large independent associations of CD4 <200 cells/mm<sup>3</sup> vs HIV- (OR 7.18, 95% CI 0.78-65.82;  $p = 0.081$ ) and co-trimoxazole and/or Dapsone use (OR 5.69, 95% CI 0.63-51.45;  $p = 0.122$ ) with moderate neutropenia.

**CONCLUSIONS:** Anemia was more common than neutropenia or thrombocytopenia in the HIV-infected Rwandan women. Future comparisons of hematological parameters in HIV infected patients before and after antiretroviral therapy initiation are warranted.

Comment [KA1]: This should be kept, it is correct

## INTRODUCTION

Acquired immunodeficiency syndrome (AIDS) is a systemic disorder caused by the human immunodeficiency virus (HIV), and characterized by severe impairment and progressive damage of both cellular and humoral immune responses. Besides immunological complications of HIV disease [1], hematological abnormalities have been documented as strong independent predictors of morbidity and mortality in HIV-infected individuals [2]. HIV replicates not only in CD4+ lymphocyte cells, but also in macrophages and dendritic cells [1, 3, 4]. Such replication is followed by immune system depression, which can lead to life-threatening opportunistic infections. Hematological complications such as mild to severe anemia are associated with HIV disease progression and subsequent reduced survival [5].

Although numerous complications occur in HIV-infected patients [2, 6, 7], the most common hematologic abnormalities are anemia and neutropenia [6]. Anemia and neutropenia are generally caused by inadequate blood cell production because of bone marrow suppression by HIV infection mediated by abnormal cytokine expression and alteration of the bone marrow microenvironment [5, 8]. Anemia in HIV-infected persons is associated with CD4 cell depletion and progression to AIDS [9] and is one of the strongest predictors of HIV mortality and poor responses to antiretroviral therapy [402]. Neutropenia is frequently observed in advanced stages of HIV infection after development of AIDS, and has been associated with certain types of antiretroviral medications used to treat HIV infection [10]. Thrombocytopenia is characterized by platelet counts below  $125 \times 10^3/\text{mm}^3$ , and also frequently occurs in HIV-infected patients [11-13]. Hematologic parameters mainly anemia and leukopenia in HIV-infected antiretroviral therapy (ART)-naïve patients result in poor ART treatment outcome and otherwise strongly predict mortality [2,14,15].

Although hematologic abnormalities are common manifestations of HIV infection and AIDS, and may have considerable impact on patients' wellbeing, treatment and care, few studies on hematologic parameters in HIV-infected persons have been undertaken in sub-Saharan Africa. Such information for HIV-infected adults in Rwanda may help to inform treatment of HIV-infected individuals in this region. We therefore assessed hematological parameters in HIV-infected antiretroviral-naïve and HIV-uninfected Rwandan women.

**Comment [KA2]:** The Levine reference (WIHS) currently #29 has this information. It should be moved up to replace #10.

## MATERIALS AND METHODS

### *Study Design*

Participants were from the Rwanda Women's Interassociation Study and Assessment (RWISA), a prospective observational cohort study on the effectiveness and toxicity of antiretroviral therapy (ART) that enrolled 710 HIV-infected and 226 uninfected women in 2005. Participants from RWISA were recruited from the Women's Equity in Access to Care and Treatment (WE-ACTx) clinical site in Kigali, community-based organizations, associations of people living with HIV/AIDS, and HIV Health Center clinical care sites in Kigali. Volunteers were included if they were ART naïve except for possible exposure to single-dose nevirapine to prevent mother to child HIV transmission; were  $\geq 25$  years of age, had resided in Rwanda in 1994, and if HIV negative would be willing to undergo voluntary counseling and testing for HIV at 6-month intervals. All participants provided information on medical history, demographic characteristics, psychosocial history, experience of trauma during the 1994 Rwandan genocide, and symptoms of depression and post-traumatic stress. This also includes symptoms and diagnoses that define World Health Organization (WHO) Stage-IV HIV illness. ~~It should be noted that such symptoms are not specific to HIV infection and are encountered in some of the HIV infected women.~~ A physical assessment was performed and specimens were taken for CD4 cell count, full blood count and other laboratory studies. Written informed consent was obtained from each participant in the local language (Kinyarwanda) in accordance with this study's protocols and procedures approved by the Rwanda National Ethics Committee and the Institutional Review Board of Montefiore Medical Center, Bronx, NY, USA. Details of the RWISA study procedures and informed consent process including video and individual discussion have been previously described [16].

### *Laboratory data*

CD4 T lymphocytes counts were determined using the Becton Dickinson (BD) FASCount system (Becton, Dickinson, Singapore) at the National Reference Laboratory, Kigali, Rwanda, and full blood count analyses were performed ~~using standard automated methods~~ at King Faisal Hospital in Kigali ~~using~~. ~~Blood hemoglobin was determined by automated blood analyzer (CELL-DYN 1800 automated blood analyzer (Abbott)).~~ A modified Methemoglobin method was used for the colorimetric determination of hemoglobin. A portion of the lysed, diluted sample from the WBC Mixing Chamber was used for hemoglobin measurement. Blood samples were sent to the

Formatted: Not Highlight

central laboratory within 2 hours after collection where HIV-1 status and CD4 count were assessed. Blood samples were tested for HIV using the Abbott's Combo HIV Test. White blood cell count and platelet counts were performed using automated hematological analyzer (micro Cobas; Hoffman La Roche, Basel, Switzerland).

### Statistical analysis

Leukocyte values, hemoglobin levels and platelet counts were analyzed as continuous variables and compared by HIV status and CD4 cell count category (<200, 200-349 and  $\geq 350/\text{mm}^3$ ) in HIV positive women. Anemia and marked anemia were defined as  $\text{Hb} < 12.0^{17}$  and  $< 10.0 \text{ mg/dl}$  respectively<sup>18,19</sup>, and neutropenia was examined at two thresholds: white blood cell count  $< 2000$  and  $< 1000 \text{ cells}/\text{mm}^3$  while thrombocytopenia was defined as platelets  $< 125.0 \times 10^3 /\text{mm}^3$  [17]. Unadjusted statistical comparisons between i) categorical predictors and categorical outcomes were made using chi-square tests, and ii) categorical predictors and continuous outcomes were made using t-tests and ANOVA. Multivariate logistic regression models with anemia, neutropenia and thrombocytopenia as outcomes were fit using forward selection and a P to enter of 0.2. Statistical analyses were performed using STATA version 11.0 and SAS 9.1.3.

## RESULTS

### Demographic Characteristics

All 936 (226 HIV- and 710 HIV+) women who participated in the RWISA study were included in this analysis. Table 1 presents characteristics of the HIV- women and the HIV+ women by CD4 count category:  $\geq 350$ , 200-349 and  $< 200 \text{ cells}/\text{mm}^3$ . HIV-uninfected, compared to HIV+ women were older (59% vs. 22% over 40 years, respectively,  $p < 0.001$ ), and more likely to be widowed (51% vs. 42%,  $p = 0.001$ ). Less than half (41%) of HIV-infected women reported a prior WHO stage IV condition. Use of dapsone or co-trimoxazole in the prior 12 months was reported by 87% of HIV+ and 19% of HIV-negative women ( $< 0.001$ ).

### Univariate Analysis of Hematologic Parameters

**Anemia:** Anemia was more common in HIV+ than HIV- women (20.5% vs 6.3% respectively;  $p < 0.001$ ), and among HIV+ women the prevalence of anemia was higher in the lower CD4 count categories:  $\geq 350$  (7.6%), 200-349 (16.0%) and  $< 200$  (32.2%)  $\text{cells}/\text{mm}^3$  (Table 1). Marked

Formatted: Not Highlight

Formatted: Not Highlight

Formatted: Not Highlight

Formatted: Not Highlight

anemia, defined as Hb<10.0 g/dL, was found in 4.2% of HIV+ and none of the HIV- women (p<0.001), again with the highest prevalence in HIV+ women with CD4<200 cells/mm<sup>3</sup> (8.4%).

**Neutropenia:** Mean (± standard deviation) white blood cell count was lower in HIV+ than HIV-negative women (3.7±1.4 vs 4.5±1.4 X 10<sup>3</sup> cells/mm<sup>3</sup>); and among HIV+ women decreased from 4.3±1.6 in those with CD4 ≥350/mm<sup>3</sup> to 3.3±1.4 X 10<sup>3</sup> cells/mm<sup>3</sup> in women with CD4<200/ mm<sup>3</sup> p<0.001). Neutropenia, defined as WBC<2,000 X 10<sup>3</sup> cells/mm<sup>3</sup>, was more common in HIV+ than HIV- women (4.2 vs. 0.5%, p=0.006) and most prevalent in HIV+ women with CD4<200 cells/mm<sup>3</sup> (8.4%, p<0.001). Only one HIV+ and one HIV- woman had profound neutropenia, defined as WBC<1,000 X 10<sup>3</sup> cells/mm<sup>3</sup>.

**Thrombocytopenia:** Mean platelet count was lower in the HIV+ compared to HIV negative women: 223.2 ± 109.0 x10<sup>3</sup>/mm<sup>3</sup> vs. 231.8± 84.5 x10<sup>3</sup>/mm<sup>3</sup> respectively, p=0.051 with minimal differences in platelet count by category of CD4+ lymphocyte count in HIV+ women (p=0.55). Thrombocytopenia was more common in HIV+ compared to HIV- women: (13.5% vs. 8.6%, p=0.047), with no significant differences among the CD4 groups in the HIV+ women (=0.92).

### Multivariate Analysis

Table 2 illustrates the results of multivariate logistic regression analyses with forward selection for all participants with anemia (Hb <12.0 g/dL, neutropenia (WBC <2,000cells/mm<sup>3</sup>) and thrombocytopenia (platelets < 125/mm<sup>3</sup>) as outcomes. Body mass index [OR 0.87 per kg/mm<sup>2</sup>, 95% confidence interval (CI) 0.82-0.93; p<0.001], CD4 200-350 vs. HIV- (OR 3.59, 95% CI 1.89-6.83; p<0.001) and CD4 < 200 vs HIV- (OR 8.09, 95% CI 4.37-14.97; <0.001) had large independent associations with anemia. Income had some independent association with anemia, but the trend and statistical significance across categories were not consistent. There were large independent associations of CD4 <200 cells/mm<sup>3</sup> vs. HIV- (OR 7.18, 95% CI 0.78-65.82; p=0.08) and co-trimoxazole/dapsone use (OR 5.69, 95% CI 0.63-51.45; p=0.12) with neutropenia. CD4>350 vs. HIV- (OR 2.62-cells/mm<sup>3</sup>, 95% confidence interval (CI) 1.19-5.78; p=0.02), CD4 200-350 vs. HIV- (OR 3.14, 95% CI 1.41-7.01; p=0.005) and CD4 < 200 vs HIV- (OR 2.48, 95% CI 1.09-5.64; p=0.03) had large independent associations with thrombocytopenia.

Comment [KA3]: Keep, this is correct



## DISCUSSION

We assessed hemoglobin levels, white blood cell counts and platelet counts in HIV-infected antiretroviral naïve and uninfected Rwandan women, and found that greater anemia, neutropenia and thrombocytopenia were all associated with HIV-positive serostatus. While anemia and neutropenia in HIV-infected women were strongly associated with lower CD4+ cell counts, thrombocytopenia was not. To that end we have compared the prevalence of abnormal hematologic parameters we observed in HIV positive women with those seen in 5 studies in sub-Saharan Africa and Western World (Table 3).

Most notably, although our findings indicated that the HIV-infected women had lower mean hemoglobin and were more likely to have anemia or marked anemia than HIV-negative women, the proportions of HIV infected (as well as uninfected) women with anemia here were lower than those from prior published studies of women in sub-Saharan Africa and Western Countries [18,20-224]. For example, the mean hemoglobin observed here of 13.1 g/dL for HIV+ and 14.5 g/dL for HIV-uninfected women were each about a full point higher in both the HIV-infected and the HIV-uninfected women compared to 2056 HIV-infected (Hb 12.3 g/dL) and 569 HIV-uninfected (Hb 13.0 g/dL) participants in the Women's Interagency HIV Study (WIHS) [18]. Lower hemoglobin levels in HIV-infected than uninfected individuals are nearly universally observed, and our finding is similar to prior studies from sub-Saharan Africa, e.g. HIV-infected women were more likely to be anemic than HIV negative women (23.6% vs. 12.8%; p=0.031) in a Ugandan study [2049]. In a recent Rwandan study of 200 HIV-infected (of whom 50 were on ART) and 50 uninfected women, the prevalence of anemia was similar to our study (29.0% and 8.0% respectively) [2347]. Poor nutritional status may also cause anemia [17], which may be reflected in the association of anemia with lower BMI in this urban Rwandan population.

The higher hemoglobin levels in the Rwandan women, with and without HIV infection, than elsewhere may be attributable to the higher altitude of Rwanda, a mountainous country, with an average of elevation 1,700 meters above sea level of 1,500 meters in Kigali, the capital city and site of this study and over 2,500 meters in some parts of the country [242]. The high hemoglobin observed in this cohort of Rwandan women may be due to acclimatization to higher altitude ensuring that women living in high altitude regions of Rwanda have similar physiologic adaptations as those living at lower altitude levels [253]. High altitude adaptations to fall in

Formatted: Not Highlight

Formatted: Not Highlight

1  
2  
3  
4  
5  
6  
7  
8  
9 partial pressure of oxygen reduces the driving pressure needed for diffusion of oxygen across  
10 the alveolar-capillary barrier, and thus a fall in arterial partial pressure of oxygen. This results in  
11 reduction of oxygen delivery to body tissues and thus potential cellular hypoxia and organ  
12 dysfunction [264]. Thus, living in higher altitude may have resulted in a fall of arterial oxygen  
13 content and reduced oxygen tissue delivery. This may have resulted in participants' adaptation  
14 to ensure restoration of arterial oxygen saturation, which increases hemoglobin concentration in  
15 individuals who habitually reside in high altitudes areas, a principle used by endurance athletes  
16 [275].  
17  
18  
19

20  
21 We have reported higher prevalence of neutropenia in the HIV-infected than uninfected  
22 Rwandan women, a common finding in sub-Saharan Africa [2049,21,-284]. Neutropenia may  
23 be due to HIV suppression of bone marrow resulting in abnormal granulopoiesis. Antigranulocyte  
24 antibodies have been described in HIV-infected persons [296], and neutropenia observed in  
25 HIV-infected adults may be attributed to decreased production of granulocyte colony-stimulating  
26 factor [3027]. It should be noted that one study from Nigeria among HIV-infected persons found  
27 a mean WBC count that was higher than the mean values for HIV-infected women in our study  
28 [219]. This difference could be attributed to different stages of HIV illnesses in the study  
29 populations and the fact that participants in our study were ART-naïve, which was not true for  
30 the Nigerian study.  
31  
32  
33  
34

35  
36 Neutropenia observed in HIV-infected women in our study was of higher prevalence in women  
37 with CD4+ lymphocyte count <200 cells/ $\mu$ L. Similarly, the Women's Interagency HIV Study  
38 found baseline neutropenia, defined as <2000 cells/mm<sup>3</sup> in 44% of women participants, and a  
39 longitudinal analysis found that worsening HIV disease was associated with subsequent  
40 neutropenia [1028]. Neutropenia in an Ivory Coast study was observed in 21% of HIV-infected  
41 patients starting co-trimoxazole prophylaxis, but low-grade neutropenia was not associated with  
42 adverse clinical consequences [3129] as is also the case in other Sub-Saharan African  
43 countries. Neutropenia in our study was independently associated with low CD4+ lymphocyte  
44 count, and this suggests that the stage of HIV-infection is an important determinant to pre-  
45 treatment neutropenia.  
46  
47  
48  
49  
50  
51  
52

1  
2  
3  
4  
5  
6  
7  
8 We observed a higher prevalence of thrombocytopenia (platelets  $\leq 125.0 \times 10^3 /\mu\text{L}$ ) in HIV-  
9 infected compared to HIV uninfected women, but no association between thrombocytopenia and  
10 CD4 count within HIV-infected women. In developed countries, thrombocytopenia is generally  
11 infrequent in healthy asymptomatic HIV-infected patients, and is associated with very advanced  
12 HIV disease and co-morbidities [320]. However, thrombocytopenia has been shown to be one of  
13 the common hematological abnormalities in patients before HAART initiation in sub-Saharan  
14 countries [28]40]. Although HIV-infected women in our study were HAART-naïve, the majority  
15 were asymptomatic and few reported WHO stage IV illness, and as noted may not have had  
16 advanced HIV disease.  
17  
18  
19  
20

21  
22 Our study has some limitations. Its cross-sectional design makes it structurally impossible to  
23 determine temporal direction or causality. ~~In addition, CD4 cells are a component of WBC, and~~  
24 ~~thus neutropenia could be influencing low CD4 count rather than vice-versa.~~ Secondly, all  
25 participants in this study were women, and as hemoglobin levels differ between men and  
26 women, our findings cannot be extrapolated to men. ~~Thirdly, the higher altitude of Rwanda as a~~  
27 ~~mountainous country may have influenced hemoglobin levels in our participants.~~ Finally, the  
28 small number of women with WBC<2.0 resulted in inadequate power to assess predictors of  
29 neutropenia. It is possible, or even likely, that the large odds ratios for the associations of co-  
30 trimoxazole use (OR=5.69 CI=0.63, 51.45) and CD4 count<200 cells/ $\mu\text{l}$  (OR=7.18 CI=0.78,  
31 65.82) with neutropenia would be significant with a larger sample size.  
32  
33  
34  
35  
36

37 In conclusion, we observed high prevalence of anemia in HIV-infected and uninfected Rwandan  
38 women. Anemia was more common in the HIV-infected than uninfected women, especially  
39 those with greater disease progression as indicated by lower CD4 cell counts. Neutropenia and  
40 thrombocytopenia were more common in the HIV-infected than uninfected Rwandan women. As  
41 anemia and neutropenia are the most common hematologic abnormalities in HAART-naïve HIV-  
42 infected women, it is important to routinely assess these parameters for timely and adequate  
43 clinical management.  
44  
45  
46  
47

#### 48 **Acknowledgements:**

49 We acknowledge RWISA participants for their valuable time and commitment, and particularly  
50 acknowledge all research staff for their contribution to this study.  
51

**Funding sources:**

All authors acknowledge support from the AIDS International Training and Research Program (Fogarty International Center, NIH D43-TW001403.) This study was supported by supplements from the National Institute of Allergy and Infectious Diseases to the Bronx/Manhattan Women's Interagency HIV Study (WIHS), which is funded by the National Institute of Allergy and Infectious (U01-AI-35004). The study was also supported in part by the Center for AIDS Research of the Albert Einstein College of Medicine and Montefiore Medical Center funded by the National Institutes of Health (NIH AI-51519) and by the National Institute of Diabetes and Digestive and Kidney Disease (DK54615), and the Chicago WIHS (U01-AI-34993).

**References**

1. Rudnicka D and Schwartz O. Intrusive HIV-1-infected cells. *Nat Immunol.* 2009;**10**: 933–34.
2. Anastos K, Shi Q, French A et al. Total Lymphocyte count, Hemoglobin and Delayed-Type Hypersensitivity as predictors of Death and AIDS Illness in HIV-1 Infected Women Receiving Highly Active Antiretroviral Therapy. *J Acquir Immune Defic Syndr.* 2004;**35**:383-92.
3. Steinman RM, Granelli-Piperno A, Pope M et al. The interaction of immunodeficiency viruses with dendritic cells. *Curr Top Microbiol Immunol.* 2003;**276**:1-30.
4. Lekkerkerker AN, van Kooyk Y, Geijtenbeek TB. Viral piracy: HIV-1 targets dendritic cells for transmission. *Curr HIV Res.* 2006;**4**:169-76.
5. Obirikorang C and Yeboah FA. Blood hemoglobin measurements as a predictive indicator for the progression of HIV/ AIDS in resource-limited setting. *J Biomed Sci.* 2009;**16**:102. doi:10.1186/1423-0127-16-102.
6. Ajayi AO, Ajayi EA, Fasakin KA. CD4+ T-lymphocytes cell counts in adults with human immunodeficiency virus infection at the medical department of a tertiary health institution in Nigeria. *Ann Afr Med.* 2009;**8**:257-60.
7. Coyle TE. Hematologic complications of human immunodeficiency virus infection and the acquired immunodeficiency syndrome. *Med Clin North Am.* 1997;**81**:449-70.
8. Aboulaflia DM, Mitsuyasu RT. Hematologic abnormalities in AIDS. *Hematol Oncol Clin North Am* 1991;**5**:195.
9. Mata-Marín JA, Gaytán-Martínez JE, Martínez-Martín RE et al. Risk factors and correlates for anemia in HIV treatment-naïve infected patients: a cross-sectional analytical study. *BMC Res Notes.* 2010;**3**:230.
10. [Levine A, Karim R, Mack W et al. Neutropenia in human immunodeficiency virus infection: data from the Women's Interagency HIV Study. \*Arch Intern Med.\* 2006;\*\*166\*\*:405–10.](#)
10. [Firnhaber C, Smeaton L, Saukila N et al. Comparisons of anemia, thrombocytopenia, and neutropenia at initiation of HIV antiretroviral therapy in Africa, Asia, and the Americas. \*Int J Infect Dis.\* 2010;\*\*14\*\*: e1088-e1092.](#)

**Formatted:** No bullets or numbering

**Comment [KA4]:** 1. This should be changed to Levine A, Karim R, Mack W et al. Neutropenia in human immunodeficiency virus infection: data from the Women's Interagency HIV Study. *Arch Intern Med.* 2006;**166**:405–10.

**Formatted:** Indent: Left: 0.25", No bullets or numbering

- 1  
2  
3  
4  
5  
6  
7  
8  
9  
10  
11  
12  
13  
14  
15  
16  
17  
18  
19  
20  
21  
22  
23  
24  
25  
26  
27  
28  
29  
30  
31  
32  
33  
34  
35  
36  
37  
38  
39  
40  
41  
42  
43  
44  
45  
46  
47  
48  
49  
50  
51  
52  
53  
54  
55  
56  
57  
58  
59  
60
11. Miguez-Burbano MJ, Jackson J Jr, Hadrigan S. Thrombocytopenia in HIV disease: clinical relevance, physiopathology and management. *Curr Med Chem Cardiovasc Hematol Agents*. 2005;**3**:365-76.
  12. Kirchoff F, Silvestri G: Is Nef the elusive cause of HIV-associated hematopoietic dysfunction? *J Clin Invest* 2008;**118**:1622-25.
  13. Dilkshit B, Wanchu A, Sachdeva RK et al. Profile of hematological abnormalities of Indian HIV infected individuals. *BMC Blood Disorders* 2009;**9**:5.
  14. Siegfried N, Uthaman OA, Rutherford GW. Optimal time for initiation of antiretroviral therapy in asymptomatic, HIV-infected, treatment-naive adults. *Cochrane Database Syst Rev*. 2010;**3**:CD008272.
  15. Wisaksana R, Sumantri R, Indrati AR et al. Anemia and iron homeostasis in a cohort of HIV-infected patients in Indonesia. *BMC Infect Dis*. 2011;**11**:213.
  16. Anastos K, Ndamage F, Lu D et al. Lipoprotein levels and cardiovascular risk in HIV infected and uninfected Rwandan women. *AIDS Res Ther*. 2010;**7**:34.
  17. [World Health Organisation: Nutritional anemia: report of a WHO Scientific Group. Geneva, Switzerland: World Health Organisation; 1968.](#)
  17. Masaisa F, Gahutu JB, Mukibi J et al. Anemia in human immunodeficiency virus infected and uninfected women in Rwanda. *Am J Trop Med Hyg*. 2011;**84**:456-60.
  18. Levine AM, Berhane K, Masri-Lavine L et al. Prevalence and Correlates of Anemia in a Cohort of HIV-Infected Women: Women's Interagency HIV Study. *JAIDS*. 2001;**26**:28-35.
  19. [Laboratory values of clinical importance. In Petersdorf RG, Adams RD, Braunwald E, et al., eds. Harrison's principles of internal medicine, 10th ed. New York, McGraw-Hill, 1983:A-3.](#)
  20. Mugisha JO, Shafer LA, Van der Paal L et al. Anaemia in a rural Ugandan HIV cohort: prevalence at enrolment, incidence, diagnosis and associated factors. *Trop Med Int Health*. 2008;**13**:788-94.
  21. Erhabor O, Ejele OA, Nwauche CA, Buseri FI. Some hematological parameters in Human Immunodeficiency Virus (HIV) infected Africans: the Nigerian Perspective. *Niger J Med*. 2005;**14**:33-8.
  22. Mildvan D, Creagh T, Leitz G et al. Anemia Prevalence Study Group. Prevalence of anemia and correlation with biomarkers and specific antiretroviral regimens in 9690 humans-immunodeficiency-virus-infected patients: findings of the Anemia Prevalence Study. *Curr Med Res Opin*. 2007;**23**: 43-55.
  23. [Masaisa F, Gahutu JB, Mukibi J et al. Anemia in human immunodeficiency virus-infected and uninfected women in Rwanda. Am J Trop Med Hyg. 2011;84:456-60.](#)
  24. Ministry of Health (MOH) [Rwanda], National Institute of Statistics of Rwanda (NISR), and ICF Macro. 2009. *Rwanda Interim Demographic and Health Survey 2007-08*. Calverton, Maryland, U.S.A.: MOH, NISR, and ICF Macro.

Formatted: Font: Italic

Formatted: Not Highlight

Formatted: Font: Font color: Auto

22-25. Storz JF and Moriyama H. Mechanisms of Hemoglobin Adaptation to High Altitude Hypoxia. High Alt Med Biol. 2008;**9**:148-57.

23-26. Windsor J and Martin D. From mountain to bedside: understanding the clinical relevance of human acclimatization to high-altitude hypoxia. Postgrad Med J. 2008;**84**:622-27.

24-27. Saunders PU, Pyne DB and Gore CJ. Endurance Training at Altitude. High Altitude Medicine & Biology. 2008;**10**:135-48.

28. [Firnhaber C, Smeaton L, Saukila N, Flanigan T, Gangakhedkar R, Kumwenda J et al. Comparisons of anemia, thrombocytopenia, and neutropenia at initiation of HIV antiretroviral therapy in Africa, Asia, and the Americas. Int J Infect Dis. 2010; 14: e1088-e1092.](#)

25-29. Kimura S, Matsuda J, Ikematsu S et al. Efficacy of recombinant human granulocyte colony-stimulating factor on neutropenia in patients with AIDS. AIDS. 1990;**4**:1251-55.

26-30. Mauss S, Steinmetz HT, Willers R et al. Induction of granulocyte colony-stimulating factor by acute febrile infection but not by neutropenia in HIV seropositive individuals. J Acquir Immune Defic Syndr Hum Retrovirol 1997;**14**:430-34.

27. ~~Levine A, Karim R, Mack W et al. Neutropenia in human immunodeficiency virus infection: data from the Women's Interagency HIV Study. Arch Intern Med. 2006;**166**:405-10.~~

28-31. Toure S, Gabillard D, Inwoley A et al. Incidence of neutropenia in HIV-infected African adults receiving co-trimoxazole prophylaxis: a 6 year cohort study in Abidjan, Côte D'Ivoire. Trans R Soc Trop Med Hyg. 2006;**100**:785-90.

32. Vannappagari V, Nkhoma ET, Atashili J et al. Prevalence, severity and duration of thrombocytopenia among HIV patients in the era of highly active antiretroviral therapy. Platelets. 2011;**22**:611-8.

29.

Formatted: Level 1, Space Before: Auto, After: Auto

Comment [KA5]: Moved this here from former reference #10.

Formatted: No bullets or numbering

Formatted: Font color: Auto

Formatted: Indent: Left: 0.25", No bullets or numbering

Formatted: Font: 11 pt

Formatted: No bullets or numbering

Formatted: Font: (Default) Times New Roman, 8 pt

Formatted: Line spacing: single, No bullets or numbering, No widow/orphan control, Don't adjust space between Latin and Asian text, Don't adjust space between Asian text and numbers



Table 1: Socio-demographic and hematologic characteristics by HIV status and CD4 cell count

| Characteristics                                                      | AMONG ALL WOMEN N (%) |                      |        | AMONG HIV+ WOMEN ONLY N (%)   |                                   |                                | p-value |
|----------------------------------------------------------------------|-----------------------|----------------------|--------|-------------------------------|-----------------------------------|--------------------------------|---------|
|                                                                      | HIV-negative (N=226)  | HIV-positive (N=710) |        | HIV+ CD4>350 cells/ul (N=197) | HIV+ CD4 200-349 cells/ul (N=268) | HIV+ CD4 <200 cells/ul (N=245) |         |
| <b>Age/years N (%)</b>                                               |                       |                      |        |                               |                                   |                                |         |
| <30                                                                  | 34 (15%)              | 158 (22%)            | <0.001 | 51 (26%)                      | 50 (19%)                          | 57 (23%)                       | 0.35    |
| 30-40                                                                | 59 (26%)              | 393 (55%)            |        | 107 (54%)                     | 151 (56%)                         | 135 (55%)                      |         |
| 40+                                                                  | 133 (59%)             | 159 (22%)            |        | 39 (20%)                      | 67 (25%)                          | 53 (22%)                       |         |
| <b>Income (Rwf)</b>                                                  |                       |                      |        |                               |                                   |                                |         |
| <10,000                                                              | 92 (45%)              | 251 (36%)            | 0.02   | 66 (34%)                      | 98 (37%)                          | 87 (37%)                       | 0.41    |
| 10,000- 35,000                                                       | 79 (39%)              | 347 (50%)            |        | 105 (54%)                     | 131 (50%)                         | 111 (47%)                      |         |
| >35,000                                                              | 33 (16%)              | 97 (14%)             |        | 22 (11%)                      | 35 (13%)                          | 40 (17%)                       |         |
| <b>Level of education N (%)</b>                                      |                       |                      |        |                               |                                   |                                |         |
| No schooling                                                         | 67 (32%)              | 156 (22%)            | 0.02   | 46 (24%)                      | 58 (22%)                          | 52 (22%)                       | 0.89    |
| Some primary school                                                  | 69 (33%)              | 269 (38%)            |        | 78 (40%)                      | 99 (37%)                          | 92 (38%)                       |         |
| Secondary or University                                              | 76 (36%)              | 277 (39%)            |        | 71 (36%)                      | 110 (41%)                         | 96 (40%)                       |         |
| <b>Marital status N (%)</b>                                          |                       |                      |        |                               |                                   |                                |         |
| Legally married/partner                                              | 80 (38%)              | 256 (36%)            | 0.004  | 86 (44%)                      | 97 (36%)                          | 73 (30%)                       | 0.034   |
| Widowed                                                              | 108 (51%)             | 296 (42%)            |        | 71 (36%)                      | 118 (44%)                         | 107 (44%)                      |         |
| Other                                                                | 25 (12%)              | 153 (22%)            |        | 38 (19%)                      | 53 (20%)                          | 62 (26%)                       |         |
| <b>Body Mass Index (kg/m<sup>2</sup>)</b>                            |                       |                      |        |                               |                                   |                                |         |
| Mean ±SD                                                             | (21.3±3.8%)           | (21.6±3.9%)          | 0.22   | (21.9±3.9%)                   | (21.9±3.9%)                       | (21.1±3.7%)                    | 0.15    |
| <b>Alcohol use N (%)</b>                                             | 56 (28%)              | 144 (21%)            | 0.04   | 39 (21%)                      | 53 (21%)                          | 52 (22%)                       | 0.98    |
| <b>Smoking N (%)</b>                                                 |                       |                      |        |                               |                                   |                                |         |
| Yes                                                                  | 7 (3%)                | 18 (3%)              | 0.58   | 4 (2%)                        | 7 (3%)                            | 7 (3%)                         | 0.86    |
| <b>WHO stage 4 N (%)</b>                                             |                       |                      |        |                               |                                   |                                |         |
| Yes                                                                  | 22 (14%)              | 288 (41%)            | <0.001 | 59 (30%)                      | 105 (39%)                         | 124 (51%)                      | <0.001  |
| <b>Co-trimoxazole/Dapsone use in prior year N (%)</b>                |                       |                      |        |                               |                                   |                                |         |
| Yes                                                                  | 41 (19%)              | 612 (87%)            | <0.001 | 145 (75%)                     | 247 (92%)                         | 220 (91%)                      | <0.001  |
| <b>Employed N (%)</b>                                                |                       |                      |        |                               |                                   |                                |         |
| Yes                                                                  | 51 (25%)              | 171 (25%)            | 0.99   | 50 (26%)                      | 63 (24%)                          | 58 (25%)                       | 0.84    |
| <b>Hemoglobin (g/dl.)</b>                                            |                       |                      |        |                               |                                   |                                |         |
| N                                                                    | 223                   | 669                  | <0.001 | 180                           | 251                               | 238                            | <0.001  |
| Mean ±SD                                                             | 14.3±1.4              | 13.1±1.6             |        | 13.5±1.3                      | 13.1±1.7                          | 12.7±1.7                       |         |
| <b>Anemia N (%)</b>                                                  | 14 (6.3%)             | 137 (20.5%)          |        | 15 (7.6%)                     | 43 (16.0%)                        | 79 (32.2%)                     | <0.001  |
| <b>Marked anemia N (%)</b>                                           | 0                     | 28 (4.2%)            | <0.001 | 4 (1.1%)                      | 6 (2.4%)                          | 20 (8.4%)                      | <0.001  |
| <b>White blood cell count, X 10<sup>3</sup> cells/mm<sup>3</sup></b> |                       |                      |        |                               |                                   |                                |         |
| N                                                                    | 223                   | 670                  |        | 181                           | 251                               | 238                            |         |
| Mean ±SD                                                             | 4.5±1.4               | 3.7±1.4              | <0.001 | 4.3±1.6                       | 3.8±1.3                           | 3.3±1.4                        | <0.001  |
| <b>Neutropenia N (%)</b>                                             |                       |                      |        |                               |                                   |                                |         |
| <2000 cells/mm <sup>3</sup>                                          | 1 (0.45%)             | 28 (4.2%)            | 0.006  | 2 (1.1%)                      | 6 (2.4%)                          | 20 (8.4%)                      | <0.001  |
| <1000 cells/mm <sup>3</sup>                                          | 1 (0.45%)             | 1 (0.15%)            |        |                               |                                   |                                |         |
| <b>Platelet count (X10<sup>3</sup>/mm<sup>3</sup>)</b>               |                       |                      |        |                               |                                   |                                |         |
| N                                                                    | 208                   | 654                  | 0.05   | 179                           | 246                               | 229                            | 0.55    |
| Mean ±SD                                                             | 231.8±84.5            | 223.2±109.0          |        | 225.9±106.7                   | 222.9±109.9                       | 221.4±110.3                    |         |
| <b>Thrombocytopenia</b>                                              | 18 (8.6%)             | 88 (13.5%)           | 0.0547 | 24 (13.4%)                    | 36 (14.6%)                        | 31 (13.5%)                     | 0.92    |

SD=Standard Deviation; WHO=World Health Organization; Anemia is defined as hemoglobin<12.0 g/dL; Marked anemia is defined as hemoglobin<10.0 g/dL; Thrombocytopenia is defined as platelet counts <125.0 X 10<sup>3</sup> /mm<sup>3</sup>. The HIV+ and HIV- women were compared using chi-square (X<sup>2</sup>) test, and similarly CD4+ cell count categories within HIV+ women were compared the X<sup>2</sup> test. Rwf=Rwandan Francs

Formatted: Font: 8 pt



Table 2: Multivariate Logistic Models with Forward Selection<sup>1</sup> for all women

| Outcomes                                                                              | Characteristics               | OR (95% C.I.)      | p-value |
|---------------------------------------------------------------------------------------|-------------------------------|--------------------|---------|
| <b>Hemoglobin (g/dl) &lt;12 g/dl (Anemia)</b>                                         |                               |                    |         |
|                                                                                       | CD4 > 350 vs HIV-             | 1.47 (0.68, 3.21)  | 0.33    |
|                                                                                       | CD4 200-350 vs HIV-           | 3.59 (1.89, 6.83)  | < 0.001 |
|                                                                                       | CD4 <200 vs HIV-              | 8.09 (4.37, 14.97) | <0.001  |
|                                                                                       | Income 10-35 K vs <10 K       | 0.68 (0.45, 1.03)  | 0.07    |
|                                                                                       | Income >35 K vs <10 K         | 0.94 (0.52, 1.70)  | 0.85    |
|                                                                                       | BMI (per kg/m <sup>2</sup> )  | 0.87 (0.82, 0.93)  | <0.001  |
| <b>WBC &lt; 2000 (Neutropenia)</b>                                                    |                               |                    |         |
|                                                                                       | CD4 > 350 vs HIV-             | 1.03 (0.08, 13.15) | 0.98    |
|                                                                                       | CD4 200-350 vs HIV-           | 1.86 (0.18, 18.85) | 0.60    |
|                                                                                       | CD4 <200 vs HIV-              | 7.18 (0.78, 65.82) | 0.08    |
|                                                                                       | Co-trimoxazole or dapsone use | 5.69 (0.63, 51.45) | 0.12    |
| <b>Platelet count (X 10<sup>3</sup> / mm<sup>3</sup>) &lt; 125 (Thrombocytopenia)</b> |                               |                    |         |
|                                                                                       | CD4 > 350 vs HIV-             | 2.62 (1.19, 5.78)  | 0.02    |
|                                                                                       | CD4 200-350 vs HIV-           | 3.14 (1.41, 7.01)  | 0.005   |
|                                                                                       | CD4 <200 vs HIV-              | 2.48 (1.09, 5.64)  | 0.03    |
|                                                                                       | Age Per 5-year                | 1.20 (1.03, 1.39)  | 0.01    |
|                                                                                       | Widowed vs married/partner    | 0.49 (0.29, 0.80)  | 0.005   |
|                                                                                       | Other vs married/partner      | 0.59 (0.32, 1.07)  | 0.08    |
|                                                                                       | BMI (per kg/m <sup>2</sup> )  | 0.95 (0.89, 1.00)  | 0.06    |
|                                                                                       | Co-trimoxazole or dapsone use | 0.73 (0.40, 1.32)  | 0.30    |

Among all non-hematological Variables in Table 1 and CD4 count category, p to enter = 0.20; Income is in Rwandan Francs;

**Table 3: Prevalence of anemia, neutropenia and thrombocytopenia in HIV-infected women in 5 studies**

| Study (N)                                    | Anemia  |         |         | Neutropenia |          | Thrombocytopenia  |
|----------------------------------------------|---------|---------|---------|-------------|----------|-------------------|
|                                              | Hb<12.0 | Hb<11.0 | Hb<10.0 | WBC<2000    | WBC<1000 | Platelets<125,000 |
| RWISA (710)<br>[Rwanda]                      | 20.3%   |         | 4.9%    | 4.2%        | 0.1%     | 13.5%             |
| WIHS* (2059)<br>[North America]              | 37.0%   |         | 7.2%    | 44%         | 7%       | 14.6%             |
| Uganda** (123)                               |         | 23.6%   |         |             |          |                   |
| APS*** (2197)<br>[North America]             | 32.3%   |         | 6.8%    |             |          |                   |
| PEARLS****<br>[Africa, Asia<br>and Americas] |         |         |         |             | ~15%     |                   |

\*WIHS=Women's Interagency HIV Study<sup>10,188,28</sup>; \*\*Uganda<sup>2019</sup>; \*\*\*APS=Anemia Prevalence Study<sup>221</sup>; \*\*\*\*PEARLS=Prospective Evaluation of ART in Resource Limited Settings<sup>2849</sup>



## Assessment of Hematological Parameters in HIV-Infected and Uninfected Rwandan Women: a cross-sectional study

|                                 |                                                                                                                                                                                                                                                                                                                                                                                                                                                                                                                                                                                                                                                                                                                                                                                                                                                                                                                                                                                                                                                               |
|---------------------------------|---------------------------------------------------------------------------------------------------------------------------------------------------------------------------------------------------------------------------------------------------------------------------------------------------------------------------------------------------------------------------------------------------------------------------------------------------------------------------------------------------------------------------------------------------------------------------------------------------------------------------------------------------------------------------------------------------------------------------------------------------------------------------------------------------------------------------------------------------------------------------------------------------------------------------------------------------------------------------------------------------------------------------------------------------------------|
| Journal:                        | <i>BMJ Open</i>                                                                                                                                                                                                                                                                                                                                                                                                                                                                                                                                                                                                                                                                                                                                                                                                                                                                                                                                                                                                                                               |
| Manuscript ID:                  | bmjopen-2012-001600.R2                                                                                                                                                                                                                                                                                                                                                                                                                                                                                                                                                                                                                                                                                                                                                                                                                                                                                                                                                                                                                                        |
| Article Type:                   | Research                                                                                                                                                                                                                                                                                                                                                                                                                                                                                                                                                                                                                                                                                                                                                                                                                                                                                                                                                                                                                                                      |
| Date Submitted by the Author:   | 26-Sep-2012                                                                                                                                                                                                                                                                                                                                                                                                                                                                                                                                                                                                                                                                                                                                                                                                                                                                                                                                                                                                                                                   |
| Complete List of Authors:       | MUNYAZESA, Elisaphane; Rwanda Biomedical Center (RBC), National Reference Division, Department of Laboratory Networks<br>Emile, Ivan; Rwanda Biomedical Center (RBC), National Reference Division, Department of Laboratory Networks<br>Mutimura, Eugene; Women's Equity in Access to Care and Treatment, Research and Scientific Capacity Building<br>Hoover, Donald; The State University of New Jersey, Department of Statistics<br>Shi, Qiuhu; School of Health Sciences and Practice, New York Medical College<br>McGinn, Aileen; Albert Einstein College of Medicine and Montefiore Medical College Center,<br>Musiime, Stephenson; Rwanda Biomedical Center (RBC), King Faisal Hospital, Kigali<br>Muhairwe, Fred; Byumba District Hospital, North Province,<br>Rutagengwa, Alfred; Nyamata District Hospital, Bugesera, Eastern Province<br>Dusingize, Jean; Women's Equity in Access to Care and Treatment, Research and Scientific Capacity Building<br>Anastos, Kathryn; Albert Einstein College of Medicine and Montefiore Medical Center, Bronx, |
| <b>Primary Subject Heading</b>: | Infectious diseases                                                                                                                                                                                                                                                                                                                                                                                                                                                                                                                                                                                                                                                                                                                                                                                                                                                                                                                                                                                                                                           |
| Secondary Subject Heading:      | Haematology (incl blood transfusion), Infectious diseases                                                                                                                                                                                                                                                                                                                                                                                                                                                                                                                                                                                                                                                                                                                                                                                                                                                                                                                                                                                                     |
| Keywords:                       | HIV & AIDS < INFECTIOUS DISEASES, Public health < INFECTIOUS DISEASES, Tropical medicine < INFECTIOUS DISEASES                                                                                                                                                                                                                                                                                                                                                                                                                                                                                                                                                                                                                                                                                                                                                                                                                                                                                                                                                |
|                                 |                                                                                                                                                                                                                                                                                                                                                                                                                                                                                                                                                                                                                                                                                                                                                                                                                                                                                                                                                                                                                                                               |

SCHOLARONE™  
Manuscripts

# Assessment of Hematological Parameters in HIV-Infected and Uninfected Rwandan Women: a cross-sectional study

Elisaphane Munyazesa MSc<sup>1</sup>; Ivan Emile, MSc<sup>2</sup>; Eugene Mutimura, PhD<sup>3</sup>; Donald R. Hoover PhD<sup>4</sup>; Qiuhi Shi, PhD<sup>5</sup>; Aileen McGinn, PhD<sup>6</sup>; Stephenson Musiime MD<sup>7</sup>; Fred Muhairwe MD<sup>8</sup>; Alfred Rutagengwa MD<sup>9</sup>; Jean Claude Dusingize, MD, MSc<sup>10</sup>, Kathryn Anastos MD<sup>11</sup>

## AUTHOR LIST

1. Elisaphane Munyazesa MSc, Rwanda Biomedical Center (RBC), Institute of HIV/AIDS and Disease Prevention and Control (IHDPC) National Reference laboratory Division, Department of Quality Control, Kigali, Rwanda; e-mail: [munyazesa@hotmail.com](mailto:munyazesa@hotmail.com)  
Contribution: Manuscript preparation and writing  
Conflict of interest: None
2. Ivan Emile, MSc, Rwanda Biomedical Center (RBC), Institute of HIV/AIDS and Disease Prevention and Control (IHDPC) National Reference laboratory Division, Department of Laboratory Network, Kigali Rwanda; e-mail: [emil.ivank@gmail.com](mailto:emil.ivank@gmail.com)  
Contribution: Manuscript preparation and writing  
Conflict of interest: None
3. Eugene Mutimura, PhD, Women's Equity in Access to Care and Treatment (WE-ACTx), Kigali Rwanda, e-mail: [eugene.mutimura@gmail.com](mailto:eugene.mutimura@gmail.com)  
Contribution: Study design, data analysis, manuscript preparation and writing  
Conflict of interest: None
4. Donald R. Hoover PhD, Rutgers, The State University of New Jersey, New Brunswick, NJ USA  
Email: [drhoover@stat.rutgers.edu](mailto:drhoover@stat.rutgers.edu)  
Contribution: Study design, data analysis and manuscript preparation.  
Conflict of interest: None
5. Qiuhi Shi, PhD School of Health Sciences and Practice, New York Medical College, NY, USA, e-mail: [gshi@data2solutions.com](mailto:gshi@data2solutions.com)  
Contribution: Data analysis, manuscript preparation  
Conflict of interest: None
6. Aileen P. McGinn, PhD, Albert Einstein College of Medicine and Montefiore Medical Center, Bronx, NY USA, e-mail: [aileen.mcginn@einsein.edu](mailto:aileen.mcginn@einsein.edu).  
Contribution: Data analysis, manuscript preparation and writing  
Conflict of interest: None
7. Stephenson Musiime MD, King Faisal Hospital, Kigali, Rwanda, e-mail: [smusiime9@gmail.com](mailto:smusiime9@gmail.com)  
Contribution: Manuscript preparation and writing  
Conflict of interest: None
8. Fred Muhairwe MD, Byumba District Hospital, Gicumbi District, Northern Province, Rwanda, e-mail: [fredmuhairwe@yahoo.co.uk](mailto:fredmuhairwe@yahoo.co.uk)  
Contribution: Manuscript preparation and writing  
Conflict of interest: None

- 1  
2 50  
3 51  
4 52  
5 53  
6 54  
7 55  
8 56  
9 57  
10 58  
11 59  
12 60  
13 61  
14 62  
15 63  
16 64  
17 65  
18 66  
19 67  
20 68  
21 69  
22 70  
23 71  
24 72  
25 73  
26 74  
27 75  
28 76  
29 77  
30 78  
31 79  
32 80  
33 81  
34 82  
35 83  
36 84  
37 85  
38 86  
39 87  
40 88  
41 89  
42 90  
43 91  
44 92  
45 93  
46 94  
47 95  
48 96  
49 97  
50 98  
51 99  
52 100
9. Alfred Rutagengwa MD, Nyamata District Hospital, Bugesera, Rwanda, e-mail: [alfar777@gmail.com](mailto:alfar777@gmail.com)  
Contribution: Manuscript preparation and writing  
Conflict of interest: None
10. Jean Claude Dusingize, MD, MSc, Women's Equity in Access to Care and Treatment (WE-ACTx), Kigali Rwanda, e-mail: [dusingize@gmail.com](mailto:dusingize@gmail.com)  
Contribution: Manuscript preparation and writing  
Conflict of interest: None
11. Kathryn Anastos, MD, Albert Einstein College of Medicine and Montefiore Medical Center, Bronx, NY USA, e-mail: [kanastos@montefiore.org](mailto:kanastos@montefiore.org)  
Contribution: Study design, obtained funding, data analysis, manuscript preparation and writing  
Conflict of interest: None

Text: 2389 words  
Abstract: 300 words  
Tables: 5  
Short Title: Hematological parameters in HIV+ Rwandan women

Correspondence to:

**Elisaphane Munyazesa, MSc**  
Rwanda Biomedical Center, IHDPC  
National Reference laboratory Division,  
**P.O. Box 4668**  
**Kigali, Rwanda,**  
**e-mail: [munyazesa@hotmail.com](mailto:munyazesa@hotmail.com)**  
**Phone: +250 0783069554**

## Abstract

**OBJECTIVES:** Although hematologic abnormalities are common manifestations of HIV infection, few studies on hematologic parameters in HIV-infected persons have been undertaken in sub Saharan Africa. The authors assessed factors associated with hematological parameters in HIV-infected antiretroviral-naïve and HIV-uninfected Rwandan women.

**STUDY DESIGN:** cross-sectional analysis of a longitudinal cohort.

**SETTING:** Community-based women's associations.

**PARTICIPANTS:** 710 HIV-infected (HIV+) antiretroviral-naïve and 226 HIV-uninfected (HIV-) women from the Rwanda Women's Interassociation Study Assessment. Hematological parameters categorized as (abnormal vs. normal) were compared by HIV status and among HIV+ women by CD4+ count category using proportions. Multivariate logistic regression models using forward selection were fit.

**RESULTS:** Prevalence of anemia [hemoglobin (Hb) <12.0 g/dl] was higher in the HIV+ group (20.5% vs 6.3%;  $p < 0.001$ ), and increased with lower CD4 counts:  $\geq 350$  (7.6% %), 200-349 (16.0%%) and  $< 200$  cells/mm<sup>3</sup> (32.2%%). Marked anemia (Hb <10.0 g/dl) was found in 4.2% of HIV+ and none of the HIV- women ( $p < 0.001$ ), and was highest in HIV+ women with CD4+  $< 200$  cells/mm<sup>3</sup> (8.4%). The HIV+ were more likely than HIV- women (4.2 vs. 0.5% respectively,  $p = 0.002$ ) to have moderate neutropenia with WBC  $< 2.0 \times 10^3$  cells/mm<sup>3</sup> and 8.4% of HIV+ women with CD4+  $< 200$  cells/mm<sup>3</sup> had moderate neutropenia. In multivariate logistic regression analysis, BMI (OR 0.87 per kg/m<sup>2</sup>, 95% CI 0.82-0.93;  $p < 0.001$ ), CD4 200-350 vs HIV- (OR 3.59, 95% CI 1.89-6.83;  $p < 0.001$ ) and CD4  $< 200$  cells/mm<sup>3</sup> vs. HIV- (OR 8.09, 95% CI 4.37-14.97;  $p < 0.001$ ) had large independent associations with anemia. There were large independent associations of CD4  $< 200$  cells/mm<sup>3</sup> vs. HIV- (OR 7.18, 95% CI 0.78-65.82;  $p = 0.081$ ) and cotrimoxazole and/or Dapsone use (OR 5.69, 95% CI 0.63-51.45;  $p = 0.122$ ) with moderate neutropenia.

**CONCLUSIONS:** Anemia was more common than neutropenia or thrombocytopenia in the HIV-infected Rwandan women. Future comparisons of hematological parameters in HIV infected patients before and after antiretroviral therapy initiation are warranted.

## INTRODUCTION

Acquired immunodeficiency syndrome (AIDS) is a systemic disorder caused by the human immunodeficiency virus (HIV), and characterized by severe impairment and progressive damage of both cellular and humoral immune responses. Besides immunological complications of HIV disease [1], hematological abnormalities have been documented as strong independent predictors of morbidity and mortality in HIV-infected individuals [2]. HIV replicates not only in CD4+ lymphocyte cells, but also in macrophages and dendritic cells [1, 3, 4]. Such replication is followed by immune system depression, which can lead to life-threatening opportunistic infections. Hematological complications such as mild to severe anemia are associated with HIV disease progression and subsequent reduced survival [5].

Although numerous complications occur in HIV-infected patients [2, 6, 7], the most common hematologic abnormalities are anemia and neutropenia [6]. Anemia and neutropenia are generally caused by inadequate blood cell production because of bone marrow suppression by HIV infection mediated by abnormal cytokine expression and alteration of the bone marrow microenvironment [5, 8]. Anemia in HIV-infected persons is associated with CD4 cell depletion and progression to AIDS [9] and is one of the strongest predictors of HIV mortality and poor responses to antiretroviral therapy [2]. Neutropenia is frequently observed in advanced stages of HIV infection after development of AIDS, and has been associated with certain types of antiretroviral medications used to treat HIV infection [10]. Thrombocytopenia is characterized by platelet counts below  $125 \times 10^3/\text{mm}^3$ , and also frequently occurs in HIV-infected patients [11-13]. Hematologic parameters mainly anemia and leukopenia in HIV-infected antiretroviral therapy (ART)-naïve patients result in poor ART treatment outcome and otherwise strongly predict mortality [2,14,15].

Although hematologic abnormalities are common manifestations of HIV infection and AIDS, and may have considerable impact on patients' wellbeing, treatment and care, few studies on hematologic parameters in HIV-infected persons have been undertaken in sub-Saharan Africa. Such information for HIV-infected adults in Rwanda may help to inform treatment of HIV-infected individuals in this region. We therefore assessed hematological parameters in HIV-infected antiretroviral-naïve and HIV-uninfected Rwandan women.



## MATERIALS AND METHODS

### *Study Design*

Participants were from the Rwanda Women's Interassociation Study and Assessment (RWISA), a prospective observational cohort study on the effectiveness and toxicity of antiretroviral therapy (ART) that enrolled 710 HIV-infected and 226 uninfected women in 2005. Participants from RWISA were recruited from the Women's Equity in Access to Care and Treatment (WE-ACTx) clinical site in Kigali, community-based organizations, associations of people living with HIV/AIDS, and HIV Health Center clinical care sites in Kigali. Volunteers were included if they were ART naïve except for possible exposure to single-dose nevirapine to prevent mother to child HIV transmission; were  $\geq 25$  years of age, had resided in Rwanda in 1994, and if HIV negative would be willing to undergo voluntary counseling and testing for HIV at 6-month intervals. All participants provided information on medical history, demographic characteristics, psychosocial history, experience of trauma during the 1994 Rwandan genocide, and symptoms of depression and post-traumatic stress. This also includes symptoms and diagnoses that define World Health Organization (WHO) Stage-IV HIV illness. A physical assessment was performed and specimens were taken for CD4 cell count, full blood count and other laboratory studies. Written informed consent was obtained from each participant in the local language (Kinyarwanda) in accordance with this study's protocols and procedures approved by the Rwanda National Ethics Committee and the Institutional Review Board of Montefiore Medical Center, Bronx, NY, USA. Details of the RWISA study procedures and informed consent process including video and individual discussion have been previously described [16].

### *Laboratory data*

CD4 T lymphocytes counts were determined using the Becton Dickinson (BD) FASCount system (Becton Dickinson, Singapore) at the National Reference Laboratory, Kigali, Rwanda, and full blood count analyses were performed at King Faisal Hospital in Kigali using CELL-DYN 1800 automated blood analyzer (Abbott). A modified Methemoglobin method was used for the colorimetric determination of hemoglobin. A portion of the lysed, diluted sample from the WBC Mixing Chamber was used for hemoglobin measurement. Blood samples were sent to the central laboratory within 2 hours after collection where HIV-1 status and CD4 count were assessed. Blood samples were tested for HIV using the Abbott's Combo HIV Test. White blood

cell count and platelet counts were performed using automated hematological analyzer (micro Cobas; Hoffman La Roche, Basel, Switzerland).

### **Statistical analysis**

Leukocyte values, hemoglobin levels and platelet counts were analyzed as continuous variables and compared by HIV status and CD4 cell count category (<200, 200-349 and  $\geq 350/\text{mm}^3$ ) in HIV positive women. Anemia and marked anemia were defined as  $\text{Hb} < 12.0^{17}$  and  $< 10.0 \text{ mg/dl}$  respectively<sup>18,19</sup>, and neutropenia was examined at two thresholds: white blood cell count <2000 and <1000 cells/  $\text{mm}^3$  while thrombocytopenia was defined as platelets  $< 125.0 \times 10^3 / \text{mm}^3$  [17]. Unadjusted statistical comparisons between i) categorical predictors and categorical outcomes were made using chi-square tests, and ii) categorical predictors and continuous outcomes were made using t-tests and ANOVA. Multivariate logistic regression models with anemia, neutropenia and thrombocytopenia as outcomes were fit using forward selection and a P to enter of 0.2. Statistical analyses were performed using STATA version 11.0 and SAS 9.1.3.

## **RESULTS**

### **Demographic Characteristics**

All 936 (226 HIV- and 710 HIV+) women who participated in the RWISA study were included in this analysis. Table 1 presents characteristics of the HIV- women and the HIV+ women by CD4 count category:  $\geq 350$ , 200-349 and  $< 200 \text{ cells}/\text{mm}^3$ . HIV-uninfected, compared to HIV+ women were older (59% vs. 22% over 40 years, respectively,  $p < 0.001$ ), and more likely to be widowed (51% vs. 42%,  $p = 0.001$ ). Less than half (41%) of HIV-infected women reported a prior WHO stage IV condition. Use of dapsone or co-trimoxazole in the prior 12 months was reported by 87% of HIV+ and 19% of HIV-negative women ( $< 0.001$ ).

### **Comparisons of Hematologic Parameters By HIV Status and CD4 Level in HIV+ Women**

**Anemia:** Anemia was more common in HIV+ than HIV- women (20.5% vs 6.3% respectively;  $p < 0.001$ ), and among HIV+ women the prevalence of anemia was higher in the lower CD4 count categories:  $\geq 350$  (7.6%), 200-349 (16.0%) and  $< 200$  (32.2%)  $\text{cells}/\text{mm}^3$  (Table 1). Marked anemia, defined as  $\text{Hb} < 10.0 \text{ g/dL}$ , was found in 4.2% of HIV+ and none of the HIV- women ( $p < 0.001$ ), again with the highest prevalence in HIV+ women with  $\text{CD4} < 200 \text{ cells}/\text{mm}^3$  (8.4%).

**Neutropenia:** Mean ( $\pm$  standard deviation) white blood cell count was lower in HIV+ than HIV-negative women ( $3.7\pm 1.4$  vs  $4.5\pm 1.4 \times 10^3$  cells/mm<sup>3</sup>); and among HIV+ women decreased from  $4.3\pm 1.6$  in those with CD4  $\geq 350$ /mm<sup>3</sup> to  $3.3\pm 1.4 \times 10^3$  cells/mm<sup>3</sup> in women with CD4 < 200/mm<sup>3</sup> ( $p < 0.001$ ). Neutropenia, defined as WBC <  $2,000 \times 10^3$  cells/mm<sup>3</sup>, was more common in HIV+ than HIV- women (4.2 vs. 0.5%,  $p = 0.006$ ) and most prevalent in HIV+ women with CD4 < 200 cells/mm<sup>3</sup> (8.4%,  $p < 0.001$ ). Only one HIV+ and one HIV- woman had profound neutropenia, defined as WBC <  $1,000 \times 10^3$  cells/mm<sup>3</sup>.

**Thrombocytopenia:** Mean platelet count was lower in the HIV+ compared to HIV negative women:  $223.2 \pm 109.0 \times 10^3$ /mm<sup>3</sup> vs.  $231.8 \pm 84.5 \times 10^3$ /mm<sup>3</sup> respectively,  $p = 0.051$  with minimal differences in platelet count by category of CD4+ lymphocyte count in HIV+ women ( $p = 0.55$ ). Thrombocytopenia was more common in HIV+ compared to HIV- women: (13.5% vs. 8.6%,  $p = 0.047$ ), with no significant differences among the CD4 groups in the HIV+ women ( $p = 0.92$ ).

### **General Univariate / Multivariate Associations With Hematologic Outcomes**

Tables 2A, 2B and 2C present the results of univariate and multivariate logistic regression analyses with forward selection for all participants with; anemia (Hb < 12.0 vs.  $\geq 12.0$  g/dL, neutropenia (WBC < 2,000 vs.  $\geq 2000$  cells/mm<sup>3</sup>) and thrombocytopenia (platelets < 125 vs.  $\geq 125$  /mm<sup>3</sup>), respectively, as outcomes. We summarize here the results of the multivariate models. Body mass index [OR 0.87 per kg/m<sup>2</sup>, 95% confidence interval (CI) 0.82-0.93;  $p < 0.001$ ], CD4 200-350 cells/mm<sup>3</sup> vs. HIV- (OR 3.59, 95% CI 1.88-6.83;  $p < 0.001$ ) and CD4 < 200 cells/mm<sup>3</sup> vs HIV- (OR 8.09, 95% CI 4.37-14.97;  $p < 0.001$ ) had large independent associations with anemia (Table 2A). Income had some independent association with anemia, but the trend and statistical significance across categories were not consistent. There were large independent associations of CD4 < 200 cells/mm<sup>3</sup> vs. HIV- (OR 7.18, 95% CI 0.78-65.82;  $p = 0.08$ ) and co-trimoxazole/dapsone use (OR 5.69, 95% CI 0.63-51.45;  $p = 0.12$ ) with neutropenia (Table 2B). Finally, CD4 > 350 vs. HIV- (OR 2.18, 95% CI 1.10-4.32;  $p = 0.03$ ), CD4 200-350 vs. HIV- (OR 2.36, 95% CI 1.25-4.56;  $p = 0.008$ ) and CD4 < 200 cells/mm<sup>3</sup> vs HIV- (OR 1.95, 95% CI 1.01-3.79;  $p = 0.05$ ) had large independent associations with thrombocytopenia (Table 2C). Higher body mass index and not being married were negatively associated with thrombocytopenia. It should be noted that despite the differences in age between HIV+ and HIV- women noted in Table 1, age was not associated with our hematological outcomes of interest or otherwise did not impact the association of HIV with these outcomes. While use of

1  
2 242 co-trimoxazole/dapsone had large univariate associations with anemia and neutropenia, these  
3  
4 243 were confounded by HIV infection / low CD4 and diminished after inclusion of this variable.  
5  
6 244  
7  
8 245  
9  
10  
11  
12  
13  
14  
15  
16  
17  
18  
19  
20  
21  
22  
23  
24  
25  
26  
27  
28  
29  
30  
31  
32  
33  
34  
35  
36  
37  
38  
39  
40  
41  
42  
43  
44  
45  
46  
47  
48  
49  
50  
51  
52  
53  
54  
55  
56  
57  
58  
59  
60

For peer review only

## DISCUSSION

We assessed hemoglobin levels, white blood cell counts and platelet counts in HIV-infected antiretroviral naïve and uninfected Rwandan women, and found that greater anemia, neutropenia and thrombocytopenia were all associated with HIV-positive serostatus. While anemia and neutropenia in HIV-infected women were strongly associated with lower CD4+ cell counts, thrombocytopenia was not. To that end we have compared the prevalence of abnormal hematologic parameters we observed in HIV positive women with those seen in 5 studies in sub-Saharan Africa and Western World (Table 3).

Most notably, although our findings indicated that the HIV-infected women had lower mean hemoglobin and were more likely to have anemia or marked anemia than HIV-negative women, the proportions of HIV infected (as well as uninfected) women with anemia here were lower than those from prior published studies of women in sub-Saharan Africa and Western Countries [18,20-22]. For example, the mean hemoglobin observed here of 13.1 g/dL for HIV+ and 14.5 g/dL for HIV-uninfected women were each about a full point higher in both the HIV-infected and the HIV-uninfected women compared to 2056 HIV-infected (Hb 12.3 g/dL) and 569 HIV-uninfected (Hb 13.0 g/dL) participants in the Women's Interagency HIV Study (WIHS) [18]. Lower hemoglobin levels in HIV-infected than uninfected individuals are nearly universally observed, and our finding is similar to prior studies from sub-Saharan Africa, e.g. HIV-infected women were more likely to be anemic than HIV negative women (23.6% vs. 12.8%;  $p=0.031$ ) in a Ugandan study [20]. In a recent Rwandan study of 200 HIV-infected (of whom 50 were on ART) and 50 uninfected women, the prevalence of anemia was similar to our study (29.0% and 8.0% respectively) [23]. Poor nutritional status may also cause anemia [17], which may be reflected in the association of anemia with lower BMI in this urban Rwandan population.

The higher hemoglobin levels in the Rwandan women, with and without HIV infection, than elsewhere may be attributable to the higher altitude of Rwanda, a mountainous country, with an elevation above sea level of 1,500 meters in Kigali, the capital city and site of this study [24]. The high hemoglobin observed in this cohort of Rwandan women may be due to acclimatization to higher altitude ensuring that women living in high altitude regions of Rwanda have similar physiologic adaptations as those living at lower altitude levels [25]. High altitude adaptations to fall in partial pressure of oxygen reduces the driving pressure needed for diffusion of oxygen

1  
2278 across the alveolar-capillary barrier, and thus a fall in arterial partial pressure of oxygen. This  
3  
4279 results in reduction of oxygen delivery to body tissues and thus potential cellular hypoxia and  
5  
6280 organ dysfunction [26]. Thus, living in higher altitude may have resulted in a fall of arterial  
7  
8281 oxygen content and reduced oxygen tissue delivery. This may have resulted in participants'  
9282 adaptation to ensure restoration of arterial oxygen saturation, which increases hemoglobin  
10  
11283 concentration in individuals who habitually reside in high altitudes areas, a principle used by  
12  
13284 endurance athletes [27].  
14  
15285

16286 We have reported higher prevalence of neutropenia in the HIV-infected than uninfected  
17  
18287 Rwandan women, a common finding in sub-Saharan Africa [20,21,28]. Neutropenia may be due  
19  
20288 to HIV suppression of bone marrow resulting in abnormal granulopoiesis. Antigranulocyte  
21  
22289 antibodies have been described in HIV-infected persons [29], and neutropenia observed in HIV-  
23  
24290 infected adults may be attributed to decreased production of granulocyte colony-stimulating  
25  
26291 factor [30]. It should be noted that one study from Nigeria among HIV-infected persons found a  
27  
28292 mean WBC count that was higher than the mean values for HIV-infected women in our study  
29  
30293 [21]. This difference could be attributed to different stages of HIV illness in the study populations  
31  
32294 and the fact that participants in our study were ART-naïve, which was not true for the Nigerian  
33  
34295 study.  
35

36296  
37297 Neutropenia observed in HIV-infected women in our study was of higher prevalence in women  
38  
39298 with CD4+ lymphocyte count <200 cells/ $\mu$ L. Similarly, the Women's Interagency HIV Study  
40  
41299 found baseline neutropenia, defined as <2000 cells/ $\text{mm}^3$ , in 44% of women participants and a  
42  
43300 longitudinal analysis found that worsening HIV disease was associated with subsequent  
44  
45301 neutropenia [10]. Neutropenia in an Ivory Coast study was observed in 21% of HIV-infected  
46  
47302 patients starting co-trimoxazole prophylaxis, but low-grade neutropenia was not associated with  
48  
49303 adverse clinical consequences [31] as is also the case in other sub-Saharan African countries.  
50  
51304 Neutropenia in our study was independently associated with low CD4+ lymphocyte count, and  
52  
53305 this suggests that the stage of HIV-infection is an important determinant to pre-treatment  
54  
55306 neutropenia.  
56

57307  
58308 We observed a higher prevalence of thrombocytopenia (platelets  $\leq 125.0 \times 10^3 /\mu\text{L}$ ) in HIV-  
59  
60309 infected compared to HIV uninfected women, but no association between thrombocytopenia and  
60



1  
2310 CD4 count within HIV-infected women. In developed countries, thrombocytopenia is generally  
3  
4311 infrequent in healthy asymptomatic HIV-infected patients, and is associated with very advanced  
5  
6312 HIV disease and co-morbidities [32]. However, thrombocytopenia has been shown to be one of  
7  
8313 the common hematological abnormalities in patients before HAART initiation in sub-Saharan  
9  
10314 countries [28]. Although HIV-infected women in our study were HAART-naïve, the majority were  
11  
12315 asymptomatic and few reported WHO stage IV illness, and as noted may not have had  
13  
14316 advanced HIV disease.

15  
16317  
17  
18318 Our study has some limitations. Its non-randomized cross-sectional design makes it structurally  
19  
20319 impossible to determine temporal direction or causality including inability of multivariate models  
21  
22320 to adjust for all confounding. Secondly, all participants in this study were women, and as  
23  
24321 hemoglobin levels differ between men and women, our findings cannot be extrapolated to men.  
25  
26322 Finally, the small number of women with  $WBC < 2.0$  cells/mm<sup>3</sup> resulted in inadequate power to  
27  
28323 assess predictors of neutropenia. It is possible, or even likely, that the large odds ratios for the  
29  
30324 associations of co-trimoxazole use (OR=5.69 CI=0.63, 51.45) and CD4 count < 200 cells/mm<sup>3</sup>  
31  
32325 (OR=7.18 CI=0.78, 65.82) with neutropenia would be significant with a larger sample size.

33  
34326  
35  
36327 In conclusion, we observed high prevalence of anemia in HIV-infected and uninfected Rwandan  
37  
38328 women. Anemia was more common in the HIV-infected than uninfected women, especially  
39  
40329 those with greater disease progression as indicated by lower CD4 cell counts. Neutropenia and  
41  
42330 thrombocytopenia were more common in the HIV-infected than uninfected Rwandan women. As  
43  
44331 anemia and neutropenia are the most common hematologic abnormalities in HAART-naïve HIV-  
45  
46332 infected women, it is important to routinely assess these parameters for timely and adequate  
47  
48333 clinical management.

#### 49 50 51334 52335 **Acknowledgements:**

53  
54336 We acknowledge RWISA participants for their valuable time and commitment, and particularly  
55  
56337 acknowledge all research staff for their contribution to this study.

#### 57 58338 59339 **Funding sources:**

60340 *All authors acknowledge support from the AIDS International Training and Research Program*  
61341 *(Fogarty International Center, NIH D43-TW001403.) This study was supported by supplements*  
62342 *from the National Institute of Allergy and Infectious Diseases to the Bronx/Manhattan Women's*  
63343 *Interagency HIV Study (WIHS), which is funded by the National Institute of Allergy and*  
64344 *Infectious (UO1-AI-35004). The study was also supported in part by the Center for AIDS*



1  
2345 *Research of the Albert Einstein College of Medicine and Montefiore Medical Center funded by*  
3346 *the National Institutes of Health (NIH AI-51519) and by the National Institute of Diabetes and*  
4347 *Digestive and Kidney Disease (DK54615), and the Chicago WIHS (U01-AI-34993).*  
5348

## 7349 **References**

- 9350 1. Rudnicka D and Schwartz O. Intrusive HIV-1-infected cells. *Nat Immunol.* 2009;**10**: 933–  
10351 34.
- 11352 2. Anastos K, Shi Q, French A et al. Total Lymphocyte count, Hemoglobin and Delayed-  
12353 Type Hypersensitivity as predictors of Death and AIDS Illness in HIV-1 Infected  
13354 Women Receiving Highly Active Antiretroviral Therapy. *J Acquir Immune Defic Syndr.*  
14355 2004;**35**:383-92.
- 15356 3. Steinman RM, Granelli-Piperno A, Pope M et al. The interaction of immunodeficiency  
16357 viruses with dendritic cells. *Curr Top Microbiol Immunol.* 2003;**276**:1-30.
- 17358 4. Lekkerkerker AN, van Kooyk Y, Geijtenbeek TB. Viral piracy: HIV-1 targets dendritic cells  
18359 for transmission. *Curr HIV Res.* 2006;**4**:169-76.
- 19360 5. Obirikorang C and Yeboah FA. Blood hemoglobin measurements as a predictive  
20361 indicator for the progression of HIV/ AIDS in resource-limited setting. *J Biomed Sci.*  
21362 2009;**16**:102. doi:10.1186/1423-0127-16-102.
- 22363 6. Ajayi AO, Ajayi EA, Fasakin KA. CD4+ T-lymphocytes cell counts in adults with human  
23364 immunodeficiency virus infection at the medical department of a tertiary health  
24365 institution in Nigeria. *Ann Afr Med.* 2009;**8**:257-60.
- 25366 7. Coyle TE. Hematologic complications of human immunodeficiency virus infection and the  
26367 acquired immunodeficiency syndrome. *Med Clin North Am.* 1997;**81**:449-70.
- 27368 8. Aboulafia DM, Mitsuyasu RT. Hematologic abnormalities in AIDS. *Hematol Oncol Clin*  
28369 *North Am* 1991;**5**:195.
- 29370 9. Mata-Marín JA, Gaytán-Martínez JE, Martínez-Martín RE et al. Risk factors and  
30371 correlates for anemia in HIV treatment-naïve infected patients: a cross-sectional  
31372 analytical study. *BMC Res Notes.* 2010;**3**:230.
- 32373 10. Levine A, Karim R, Mack W et al. Neutropenia in human immunodeficiency virus  
33374 infection: data from the Women's Interagency HIV Study. *Arch Intern Med.*  
34375 2006;**166**:405–10.
- 35376 11. Miguez-Burbano MJ, Jackson J Jr, Hadrigan S. Thrombocytopenia in HIV disease:  
36377 clinical relevance, physiopathology and management. *Curr Med Chem Cardiovasc*  
37378 *Hematol Agents.* 2005;**3**:365-76.
- 38379 12. Kirchhoff F, Silvestri G: Is Nef the elusive cause of HIV-associated hematopoietic  
39380 dysfunction? *J Clin Invest* 2008;**118**:1622-25.
- 40381 13. Dilks B, Wanchu A, Sachdeva RK et al. Profile of hematological abnormalities of Indian  
41382 HIV infected individuals. *BMC Blood Disorders* 2009;**9**:5.
- 42383 14. Siegfried N, Uthaman OA, Rutherford GW. Optimal time for initiation of antiretroviral  
43384 therapy in asymptomatic, HIV-infected, treatment-naive adults. *Cochrane Database*  
44385 *Syst Rev.* 2010;**3**:CD008272.

- 1  
2386 15. Wisaksana R, Sumantri R, Indrati AR et al. Anemia and iron homeostasis in a cohort of  
3 HIV-infected patients in Indonesia. *BMC Infect Dis.* 2011;**11**:213.  
4387  
5388 16. Anastos K, Ndamage F, Lu D et al. Lipoprotein levels and cardiovascular risk in HIV  
6389 infected and uninfected Rwandan women. *AIDS Res Ther.* 2010;**7**:34.  
7  
8390 17. *World Health Organisation: Nutritional anemia: report of a WHO Scientific Group.*  
9391 *Geneva, Switzerland: World Health Organisation; 1968.*  
10  
1192 18. Levine AM, Berhane K, Masri-Lavine L et al. Prevalence and Correlates of Anemia in a  
12 Cohort of HIV-Infected Women: Women's Interagency HIV Study. *JAIDS.* 2001;**26**:28-  
13393 35.  
1494  
1595 19. Laboratory values of clinical importance. In Petersdorf RG, Adams RD, Braunwald E, et  
16 al., eds. *Harrison's principles of internal medicine*, 10th ed. New York, McGraw-Hill,  
17396 1983:A-3.  
1897  
1998 20. Mugisha JO, Shafer LA, Van der Paal L et al. Anaemia in a rural Ugandan HIV cohort:  
20 prevalence at enrolment, incidence, diagnosis and associated factors. *Trop Med Int*  
2199 *Health.* 2008;**13**:788-94.  
2200  
2301 21. Erhabor O, Ejele OA, Nwauche CA, Buseri FI. Some hematological parameters in Human  
24 Immunodeficiency Virus (HIV) infected Africans: the Nigerian Perspective. *Niger J*  
2502 *Med.* 2005;**14**:33-8.  
2603  
2704 22. Mildvan D, Creagh T, Leitz G et al. Anemia Prevalence Study Group. Prevalence of  
28 anemia and correlation with biomarkers and specific antiretroviral regimens in 9690  
2905 humans-immunodeficiency-virus-infected patients: findings of the Anemia Prevalence  
3006 Study. *Curr Med Res Opin.* 2007;**23**: 43-55.  
31  
3207  
3308 23. Masaisa F, Gahutu JB, Mukiibi J et al. Anemia in human immunodeficiency virus-infected  
3409 and uninfected women in Rwanda. *Am J Trop Med Hyg.* 2011;**84**:456-60.  
35  
3610 24. Ministry of Health (MOH) [Rwanda], National Institute of Statistics of Rwanda (NISR), and  
3711 ICF Macro. 2009. *Rwanda Interim Demographic and Health Survey 2007-08.*  
3812 *Calverton, Maryland, U.S.A.: MOH, NISR, and ICF Macro.*  
39  
4013 25. Storz JF and Moriyama H. Mechanisms of Hemoglobin Adaptation to High Altitude  
4114 Hypoxia. *High Alt Med Biol.* 2008;**9**:148-57.  
42  
4315 26. Windsor J and Martin D. From mountain to bedside: understanding the clinical relevance  
4416 of human acclimatization to high-altitude hypoxia. *Postgrad Med J.* 2008;**84**:622-27.  
4517  
4618 27. Saunders PU, Pyne DB and Gore CJ. Endurance Training at Altitude. *High Altitude*  
47 *Medicine & Biology.* 2008;**10**:135-48.  
4819  
4920 28. Firnhaber C, Smeaton L, Saukila N, Flanigan T, Gangakhedkar R, Kumwenda J et al.  
50 Comparisons of anemia, thrombocytopenia, and neutropenia at initiation of HIV  
5121 antiretroviral therapy in Africa, Asia, and the Americas. *Int J Infect Dis.* 2010; **14**:  
5222 e1088-e1092.  
53  
5423 29. Kimura S, Matsuda J, Ikematsu S et al. Efficacy of recombinant human granulocyte  
5524 colony-stimulating factor on neutropenia in patients with AIDS. *AIDS.* 1990;**4**:1251-55.  
56  
57  
58  
59  
60

- 1  
2425 30. Mauss S, Steinmetz HT, Willers R et al. Induction of granulocyte colony-stimulating factor  
3 by acute febrile infection but not by neutropenia in HIV seropositive individuals. *J*  
4 426 *Acquir Immune Defic Syndr Hum Retrovirol* 1997;**14**:430–34.  
5427  
6428  
7  
8429 31. Toure S, Gabillard D, Inwoley A et al. Incidence of neutropenia in HIV-infected African  
9430 adults receiving co-trimoxazole prophylaxis: a 6 year cohort study in Abidjan, Côte  
10 431 D'Ivoire. *Trans R Soc Trop Med Hyg.* 2006;**100**:785–90.  
11  
12432 32. Vannappagari V, Nkhoma ET, Atashili J et al. Prevalence, severity and duration of  
13433 thrombocytopenia among HIV patients in the era of highly active antiretroviral therapy.  
14 434 *Platelets.* 2011;**22**:611-8.  
15  
16435  
17436  
18  
19 437  
2038  
21  
22  
23  
24  
25  
26  
27  
28  
29  
30  
31  
32  
33  
34  
35  
36  
37  
38  
39  
40  
41  
42  
43  
44  
45  
46  
47  
48  
49  
50  
51  
52  
53  
54  
55  
56  
57  
58  
59  
60

## Assessment of Hematological Parameters in HIV-Infected and Uninfected Rwandan Women: a cross-sectional study

Elisaphane Munyazesa MSc<sup>1</sup>; Ivan Emile, MSc<sup>2</sup>; Eugene Mutimura, PhD<sup>3</sup>; Donald R. Hoover PhD<sup>4</sup>; Qiuhu Shi, PhD<sup>5</sup>; Aileen McGinn, PhD<sup>6</sup>; Stephenson Musiime MD<sup>7</sup>; Fred Muhairwe MD<sup>8</sup>; Alfred Rutagengwa MD<sup>9</sup>; Jean Claude Dusingize, MD, MSc<sup>10</sup>, Kathryn Anastos MD<sup>11</sup>

### AUTHOR LIST

1. Elisaphane Munyazesa MSc, Rwanda Biomedical Center (RBC), Institute of HIV/AIDS and Disease Prevention and Control (IHDP) National Reference laboratory Division, Department of Quality Control, Kigali, Rwanda; e-mail: [munyazesa@hotmail.com](mailto:munyazesa@hotmail.com)  
Contribution: Manuscript preparation and writing  
Conflict of interest: None
2. Ivan Emile, MSc, Rwanda Biomedical Center (RBC), Institute of HIV/AIDS and Disease Prevention and Control (IHDP) National Reference laboratory Division, Department of Laboratory Network, Kigali Rwanda; e-mail: [emil.ivank@gmail.com](mailto:emil.ivank@gmail.com)  
Contribution: Manuscript preparation and writing  
Conflict of interest: None
3. Eugene Mutimura, PhD, Women's Equity in Access to Care and Treatment (WE-ACTx), Kigali Rwanda, e-mail: [eugene.mutimura@gmail.com](mailto:eugene.mutimura@gmail.com)  
Contribution: Study design, data analysis, manuscript preparation and writing  
Conflict of interest: None
4. Donald R. Hoover PhD, Rutgers, The State University of New Jersey, New Brunswick, NJ USA  
Email: [drhoover@stat.rutgers.edu](mailto:drhoover@stat.rutgers.edu)  
Contribution: Study design, data analysis and manuscript preparation.  
Conflict of interest: None
5. Qiuhu Shi, PhD School of Health Sciences and Practice, New York Medical College, NY, USA, e-mail: [qshi@data2solutions.com](mailto:qshi@data2solutions.com)  
Contribution: Data analysis, manuscript preparation  
Conflict of interest: None
6. Aileen P. McGinn, PhD, Albert Einstein College of Medicine and Montefiore Medical Center, Bronx, NY USA, e-mail: [aileen.mcginn@einsein.edu](mailto:aileen.mcginn@einsein.edu)  
Contribution: Data analysis, manuscript preparation and writing  
Conflict of interest: None
7. Stephenson Musiime MD, King Faisal Hospital, Kigali, Rwanda, e-mail: [smusiime9@gmail.com](mailto:smusiime9@gmail.com)  
Contribution: Manuscript preparation and writing  
Conflict of interest: None
8. Fred Muhairwe MD, Byumba District Hospital, Gicumbi District, Northern Province, Rwanda, e-mail: [fredmuhairwe@yahoo.co.uk](mailto:fredmuhairwe@yahoo.co.uk)  
Contribution: Manuscript preparation and writing  
Conflict of interest: None

Formatted: Numbering:  
Continuous

- 1  
2  
3  
4  
5  
6  
7  
8  
9 50 9. Alfred Rutagengwa MD, Nyamata District Hospital, Bugesera, Rwanda, e-mail:  
10 51 [alfar777@gmail.com](mailto:alfar777@gmail.com)  
11 52 Contribution: Manuscript preparation and writing  
12 53 Conflict of interest: None  
13 54  
14 55 10. Jean Claude Dusingize, MD, MSc, Women's Equity in Access to Care and Treatment (WE-  
15 56 ACTx), Kigali Rwanda, e-mail: [dusingize@gmail.com](mailto:dusingize@gmail.com)  
16 57 Contribution: Manuscript preparation and writing  
17 58 Conflict of interest: None  
18 59  
19 60 11. Kathryn Anastos, MD, Albert Einstein College of Medicine and Montefiore Medical Center, Bronx,  
20 61 NY USA, e-mail: [kanastos@montefiore.org](mailto:kanastos@montefiore.org)  
21 62 Contribution: Study design, obtained funding, data analysis, manuscript preparation and writing  
22 63 Conflict of interest: None  
23 64  
24 65  
25 66  
26 67

27 67 | Text: 238946 words  
28 68 | Abstract: 300 words  
29 69 | Tables: 53  
30 70 | Short Title: Hematological parameters in HIV+ Rwandan women  
31 71

32 72 Correspondence to:

33 73  
34 74 **Elisaphane Munyazesa, MSc**  
35 75 Rwanda Biomedical Center, IHDPC  
36 76 National Reference laboratory Division,  
37 77 **P.O. Box 4668**  
38 78 **Kigali, Rwanda,**  
39 79 **e-mail: [munyazesa@hotmail.com](mailto:munyazesa@hotmail.com)**  
40 80 **Phone: +250 0783069554**  
41 81  
42 82  
43  
44  
45  
46  
47  
48  
49  
50  
51  
52  
53  
54  
55  
56  
57  
58  
59  
60

**Abstract**

**OBJECTIVES:** Although hematologic abnormalities are common manifestations of HIV infection, few studies on hematologic parameters in HIV-infected persons have been undertaken in sub Saharan Africa. The authors assessed factors associated with hematological parameters in HIV-infected antiretroviral-naïve and HIV-uninfected Rwandan women.

**STUDY DESIGN:** cross-sectional analysis of a longitudinal cohort.

**SETTING:** Community-based women's associations.

**PARTICIPANTS:** 710 HIV-infected (HIV+) antiretroviral-naïve and 226 HIV-uninfected (HIV-) women from the Rwanda Women's Interassociation Study Assessment. Hematological parameters categorized as (abnormal vs. normal) were compared by HIV status and among HIV+ women by CD4+ count category using proportions. Multivariate logistic regression models using forward selection were fit.

**RESULTS:** Prevalence of anemia [hemoglobin (Hb) <12.0 g/dl] was higher in the HIV+ group (20.5% vs 6.3%;  $p < 0.001$ ), and increased with lower CD4 counts:  $\geq 350$  (7.6% %), 200-349 (16.0%%) and  $< 200$  cells/mm<sup>3</sup> (32.2%%). Marked anemia (Hb <10.0 g/dl) was found in 4.2% of HIV+ and none of the HIV- women ( $p < 0.001$ ), and was highest in HIV+ women with CD4+  $< 200$  cells/mm<sup>3</sup> (8.4%). The HIV+ were more likely than HIV- women (4.2 vs. 0.5% respectively,  $p = 0.002$ ) to have moderate neutropenia with WBC  $< 2.0 \times 10^3$  cells/mm<sup>3</sup> and 8.4% of HIV+ women with CD4+  $< 200$  cells/mm<sup>3</sup> had moderate neutropenia. In multivariate logistic regression analysis, BMI (OR 0.87 per kg/m<sup>2</sup>, 95% CI 0.82-0.93;  $p < 0.001$ ), CD4 200-350 vs HIV- (OR 3.59, 95% CI 1.89-6.83;  $p < 0.001$ ) and CD4  $< 200$  cells/mm<sup>3</sup> vs. HIV- (OR 8.09, 95% CI 4.37-14.97;  $p < 0.001$ ) had large independent associations with anemia. There were large independent associations of CD4  $< 200$  cells/mm<sup>3</sup> vs. HIV- (OR 7.18, 95% CI 0.78-65.82;  $p = 0.081$ ) and co-trimoxazole and/or Dapsone use (OR 5.69, 95% CI 0.63-51.45;  $p = 0.122$ ) with moderate neutropenia.

**CONCLUSIONS:** Anemia was more common than neutropenia or thrombocytopenia in the HIV-infected Rwandan women. Future comparisons of hematological parameters in HIV infected patients before and after antiretroviral therapy initiation are warranted.

## INTRODUCTION

Acquired immunodeficiency syndrome (AIDS) is a systemic disorder caused by the human immunodeficiency virus (HIV), and characterized by severe impairment and progressive damage of both cellular and humoral immune responses. Besides immunological complications of HIV disease [1], hematological abnormalities have been documented as strong independent predictors of morbidity and mortality in HIV-infected individuals [2]. HIV replicates not only in CD4+ lymphocyte cells, but also in macrophages and dendritic cells [1, 3, 4]. Such replication is followed by immune system depression, which can lead to life-threatening opportunistic infections. Hematological complications such as mild to severe anemia are associated with HIV disease progression and subsequent reduced survival [5].

Although numerous complications occur in HIV-infected patients [2, 6, 7], the most common hematologic abnormalities are anemia and neutropenia [6]. Anemia and neutropenia are generally caused by inadequate blood cell production because of bone marrow suppression by HIV infection mediated by abnormal cytokine expression and alteration of the bone marrow microenvironment [5, 8]. Anemia in HIV-infected persons is associated with CD4 cell depletion and progression to AIDS [9] and is one of the strongest predictors of HIV mortality and poor responses to antiretroviral therapy [2]. Neutropenia is frequently observed in advanced stages of HIV infection after development of AIDS, and has been associated with certain types of antiretroviral medications used to treat HIV infection [10]. Thrombocytopenia is characterized by platelet counts below  $125 \times 10^3/\text{mm}^3$ , and also frequently occurs in HIV-infected patients [11-13]. Hematologic parameters mainly anemia and leukopenia in HIV-infected antiretroviral therapy (ART)-naïve patients result in poor ART treatment outcome and otherwise strongly predict mortality [2,14,15].

Although hematologic abnormalities are common manifestations of HIV infection and AIDS, and may have considerable impact on patients' wellbeing, treatment and care, few studies on hematologic parameters in HIV-infected persons have been undertaken in sub-Saharan Africa. Such information for HIV-infected adults in Rwanda may help to inform treatment of HIV-infected individuals in this region. We therefore assessed hematological parameters in HIV-infected antiretroviral-naïve and HIV-uninfected Rwandan women.



## MATERIALS AND METHODS

### *Study Design*

Participants were from the Rwanda Women's Interassociation Study and Assessment (RWISA), a prospective observational cohort study on the effectiveness and toxicity of antiretroviral therapy (ART) that enrolled 710 HIV-infected and 226 uninfected women in 2005. Participants from RWISA were recruited from the Women's Equity in Access to Care and Treatment (WE-ACTx) clinical site in Kigali, community-based organizations, associations of people living with HIV/AIDS, and HIV Health Center clinical care sites in Kigali. Volunteers were included if they were ART naive except for possible exposure to single-dose nevirapine to prevent mother to child HIV transmission; were  $\geq 25$  years of age, had resided in Rwanda in 1994, and if HIV negative would be willing to undergo voluntary counseling and testing for HIV at 6-month intervals. All participants provided information on medical history, demographic characteristics, psychosocial history, experience of trauma during the 1994 Rwandan genocide, and symptoms of depression and post-traumatic stress. This also includes symptoms and diagnoses that define World Health Organization (WHO) Stage-IV HIV illness. A physical assessment was performed and specimens were taken for CD4 cell count, full blood count and other laboratory studies. Written informed consent was obtained from each participant in the local language (Kinyarwanda) in accordance with this study's protocols and procedures approved by the Rwanda National Ethics Committee and the Institutional Review Board of Montefiore Medical Center, Bronx, NY, USA. Details of the RWISA study procedures and informed consent process including video and individual discussion have been previously described [16].

### *Laboratory data*

CD4 T lymphocytes counts were determined using the Becton Dickinson (BD) FASCount system (Becton Dickinson, Singapore) at the National Reference Laboratory, Kigali, Rwanda, and full blood count analyses were performed at King Faisal Hospital in Kigali using CELL-DYN 1800 automated blood analyzer (Abbott). A modified Methemoglobin method was used for the colorimetric determination of hemoglobin. A portion of the lysed, diluted sample from the WBC Mixing Chamber was used for hemoglobin measurement. Blood samples were sent to the central laboratory within 2 hours after collection where HIV-1 status and CD4 count were assessed. Blood samples were tested for HIV using the Abbott's Combo HIV Test. White blood

cell count and platelet counts were performed using automated hematological analyzer (micro Cobas; Hoffman La Roche, Basel, Switzerland).

### Statistical analysis

Leukocyte values, hemoglobin levels and platelet counts were analyzed as continuous variables and compared by HIV status and CD4 cell count category (<200, 200-349 and  $\geq 350/\text{mm}^3$ ) in HIV positive women. Anemia and marked anemia were defined as  $\text{Hb} < 12.0^{17}$  and  $< 10.0 \text{ mg/dl}$  respectively<sup>18,19</sup>, and neutropenia was examined at two thresholds: white blood cell count  $< 2000$  and  $< 1000 \text{ cells}/\text{mm}^3$  while thrombocytopenia was defined as platelets  $< 125.0 \times 10^3/\text{mm}^3$  [17]. Unadjusted statistical comparisons between i) categorical predictors and categorical outcomes were made using chi-square tests, and ii) categorical predictors and continuous outcomes were made using t-tests and ANOVA. Multivariate logistic regression models with anemia, neutropenia and thrombocytopenia as outcomes were fit using forward selection and a P to enter of 0.2. Statistical analyses were performed using STATA version 11.0 and SAS 9.1.3.

## RESULTS

### Demographic Characteristics

All 936 (226 HIV- and 710 HIV+) women who participated in the RWISA study were included in this analysis. Table 1 presents characteristics of the HIV- women and the HIV+ women by CD4 count category:  $\geq 350$ , 200-349 and  $< 200 \text{ cells}/\text{mm}^3$ . HIV-uninfected, compared to HIV+ women were older (59% vs. 22% over 40 years, respectively,  $p < 0.001$ ), and more likely to be widowed (51% vs. 42%,  $p = 0.001$ ). Less than half (41%) of HIV-infected women reported a prior WHO stage IV condition. Use of dapsone or co-trimoxazole in the prior 12 months was reported by 87% of HIV+ and 19% of HIV-negative women ( $< 0.001$ ).

### Univariate Analysis Comparisons of Hematologic Parameters By HIV Status and CD4 Level in HIV+ Women

**Anemia:** Anemia was more common in HIV+ than HIV- women (20.5% vs 6.3% respectively;  $p < 0.001$ ), and among HIV+ women the prevalence of anemia was higher in the lower CD4 count categories:  $\geq 350$  (7.6%), 200-349 (16.0%) and  $< 200$  (32.2%)  $\text{cells}/\text{mm}^3$  (Table 1). Marked anemia, defined as  $\text{Hb} < 10.0 \text{ g/dL}$ , was found in 4.2% of HIV+ and none of the HIV- women ( $p < 0.001$ ), again with the highest prevalence in HIV+ women with  $\text{CD4} < 200 \text{ cells}/\text{mm}^3$  (8.4%).

**Neutropenia:** Mean ( $\pm$  standard deviation) white blood cell count was lower in HIV+ than HIV-negative women ( $3.7 \pm 1.4$  vs  $4.5 \pm 1.4 \times 10^3$  cells/mm<sup>3</sup>); and among HIV+ women decreased from  $4.3 \pm 1.6$  in those with CD4  $\geq 350$ /mm<sup>3</sup> to  $3.3 \pm 1.4 \times 10^3$  cells/mm<sup>3</sup> in women with CD4 < 200/mm<sup>3</sup> ( $p < 0.001$ ). Neutropenia, defined as WBC <  $2,000 \times 10^3$  cells/mm<sup>3</sup>, was more common in HIV+ than HIV- women (4.2 vs. 0.5%,  $p = 0.006$ ) and most prevalent in HIV+ women with CD4 < 200 cells/mm<sup>3</sup> (8.4%,  $p < 0.001$ ). Only one HIV+ and one HIV- woman had profound neutropenia, defined as WBC <  $1,000 \times 10^3$  cells/mm<sup>3</sup>.

**Thrombocytopenia:** Mean platelet count was lower in the HIV+ compared to HIV negative women:  $223.2 \pm 109.0 \times 10^3$ /mm<sup>3</sup> vs.  $231.8 \pm 84.5 \times 10^3$ /mm<sup>3</sup> respectively,  $p = 0.051$  with minimal differences in platelet count by category of CD4+ lymphocyte count in HIV+ women ( $p = 0.55$ ). Thrombocytopenia was more common in HIV+ compared to HIV- women: (13.5% vs. 8.6%,  $p = 0.047$ ), with no significant differences among the CD4 groups in the HIV+ women ( $p = 0.92$ ).

#### **General Univariate / Multivariate Analysis Associations With Hematologic Outcomes**

Tables 2Aa, 2Bb and 2Cc, respectively, present/illustrates the results of univariate and multivariate logistic regression analyses with forward selection for all participants with: anemia (Hb < 12.0 vs.  $\geq 12.0$  g/dL, neutropenia (WBC < 2,000 vs.  $\geq 2000$  cells/mm<sup>3</sup>) and thrombocytopenia (platelets < 125 vs.  $\geq 125$  /mm<sup>3</sup>), respectively, -as outcomes. We summarize here the results of the multivariate models. Body mass index [OR 0.87 per kg/mm<sup>2</sup>, 95% confidence interval (CI) 0.82-0.93;  $p < 0.001$ ], CD4 200-350 cells/mm<sup>3</sup> vs. HIV- (OR 3.59, 95% CI 1.88-6.83;  $p < 0.001$ ) and CD4 < 200 cells/mm<sup>3</sup> vs HIV- (OR 8.09, 95% CI 4.37-14.97;  $p < 0.001$ ) had large independent associations with anemia (Table 2Aa). Income had some independent association with anemia, but the trend and statistical significance across categories were not consistent. There were large independent associations of CD4 < 200 cells/mm<sup>3</sup> vs. HIV- (OR 7.18, 95% CI 0.78-65.82;  $p = 0.08$ ) and co-trimoxazole/dapsone use (OR 5.69, 95% CI 0.63-51.45;  $p = 0.12$ ) with neutropenia (Table 2Bb). Finally, CD4 > 350 vs. HIV- (OR 2.1862, 95% CI 1.109-45.3278;  $p = 0.032$ ), CD4 200-350 vs. HIV- (OR 2.363-14, 95% CI 1.2541-4.567-04;  $p = 0.0085$ ) and CD4 < 200 cells/mm<sup>3</sup> vs HIV- (OR 1.952-48, 95% CI 1.019-3.795-64;  $p = 0.053$ ) had large independent associations with thrombocytopenia (Table 2Cc). Higher body mass index and not being married were negatively associated with thrombocytopenia. It should be noted that despite the differences in age between HIV+ and HIV- women noted in Table 1, age was not associated with our hematological outcomes of interest or otherwise did not impact the

1  
2  
3  
4  
5  
6  
7  
8  
9 association of HIV with these outcomes. While use of -co-trimoxazole/dapsone had  
10 large univariate associations with anemia and neutropenia, these were confounded by HIV  
11 infection / low CD4 and diminished after inclusion of this variable.  
12  
13  
14  
15  
16  
17  
18  
19  
20  
21  
22  
23  
24  
25  
26  
27  
28  
29  
30  
31  
32  
33  
34  
35  
36  
37  
38  
39  
40  
41  
42  
43  
44  
45  
46  
47  
48  
49  
50  
51  
52  
53  
54  
55  
56  
57  
58  
59  
60

## DISCUSSION

We assessed hemoglobin levels, white blood cell counts and platelet counts in HIV-infected antiretroviral naïve and uninfected Rwandan women, and found that greater anemia, neutropenia and thrombocytopenia were all associated with HIV-positive serostatus. While anemia and neutropenia in HIV-infected women were strongly associated with lower CD4+ cell counts, thrombocytopenia was not. To that end we have compared the prevalence of abnormal hematologic parameters we observed in HIV positive women with those seen in 5 studies in sub-Saharan Africa and Western World (Table 3).

Most notably, although our findings indicated that the HIV-infected women had lower mean hemoglobin and were more likely to have anemia or marked anemia than HIV-negative women, the proportions of HIV infected (as well as uninfected) women with anemia here were lower than those from prior published studies of women in sub-Saharan Africa and Western Countries [18,20-22]. For example, the mean hemoglobin observed here of 13.1 g/dL for HIV+ and 14.5 g/dL for HIV-uninfected women were each about a full point higher in both the HIV-infected and the HIV-uninfected women compared to 2056 HIV-infected (Hb 12.3 g/dL) and 569 HIV-uninfected (Hb 13.0 g/dL) participants in the Women's Interagency HIV Study (WIHS) [18]. Lower hemoglobin levels in HIV-infected than uninfected individuals are nearly universally observed, and our finding is similar to prior studies from sub-Saharan Africa, e.g. HIV-infected women were more likely to be anemic than HIV negative women (23.6% vs. 12.8%;  $p=0.031$ ) in a Ugandan study [20]. In a recent Rwandan study of 200 HIV-infected (of whom 50 were on ART) and 50 uninfected women, the prevalence of anemia was similar to our study (29.0% and 8.0% respectively) [23]. Poor nutritional status may also cause anemia [17], which may be reflected in the association of anemia with lower BMI in this urban Rwandan population.

The higher hemoglobin levels in the Rwandan women, with and without HIV infection, than elsewhere may be attributable to the higher altitude of Rwanda, a mountainous country, with an elevation above sea level of 1,500 meters in Kigali, the capital city and site of this study [24].

The high hemoglobin observed in this cohort of Rwandan women may be due to acclimatization to higher altitude ensuring that women living in high altitude regions of Rwanda have similar physiologic adaptations as those living at lower altitude levels [25]. High altitude adaptations to fall in partial pressure of oxygen reduces the driving pressure needed for diffusion of oxygen

1  
2  
3  
4  
5  
6  
7  
8  
9 across the alveolar-capillary barrier, and thus a fall in arterial partial pressure of oxygen. This  
10 results in reduction of oxygen delivery to body tissues and thus potential cellular hypoxia and  
11 organ dysfunction [26]. Thus, living in higher altitude may have resulted in a fall of arterial  
12 oxygen content and reduced oxygen tissue delivery. This may have resulted in participants'  
13 adaptation to ensure restoration of arterial oxygen saturation, which increases hemoglobin  
14 concentration in individuals who habitually reside in high altitudes areas, a principle used by  
15 endurance athletes [27].  
16  
17

18  
19 We have reported higher prevalence of neutropenia in the HIV-infected than uninfected  
20 Rwandan women, a common finding in sub-Saharan Africa [20,21,28]. Neutropenia may be due  
21 to HIV suppression of bone marrow resulting in abnormal granulopoiesis. Antigranulocyte  
22 antibodies have been described in HIV-infected persons [29], and neutropenia observed in HIV-  
23 infected adults may be attributed to decreased production of granulocyte colony-stimulating  
24 factor [30]. It should be noted that one study from Nigeria among HIV-infected persons found a  
25 mean WBC count that was higher than the mean values for HIV-infected women in our study  
26 [21]. This difference could be attributed to different stages of HIV illness in the study populations  
27 and the fact that participants in our study were ART-naïve, which was not true for the Nigerian  
28 study.  
29  
30

31  
32  
33  
34  
35 Neutropenia observed in HIV-infected women in our study was of higher prevalence in women  
36 with CD4+ lymphocyte count <200 cells/ $\mu$ L. Similarly, the Women's Interagency HIV Study  
37 found baseline neutropenia, defined as <2000 cells/ $\text{mm}^3$ , in 44% of women participants and a  
38 longitudinal analysis found that worsening HIV disease was associated with subsequent  
39 neutropenia [10]. Neutropenia in an Ivory Coast study was observed in 21% of HIV-infected  
40 patients starting co-trimoxazole prophylaxis, but low-grade neutropenia was not associated with  
41 adverse clinical consequences [31] as is also the case in other sub-Saharan African countries.  
42  
43  
44 Neutropenia in our study was independently associated with low CD4+ lymphocyte count, and  
45 this suggests that the stage of HIV-infection is an important determinant to pre-treatment  
46 neutropenia.  
47  
48

49  
50 We observed a higher prevalence of thrombocytopenia (platelets  $\leq 125.0 \times 10^3 /\mu\text{L}$ ) in HIV-  
51 infected compared to HIV uninfected women, but no association between thrombocytopenia and  
52

1  
2  
3  
4  
5  
6  
7  
8  
9  
10  
11  
12  
13  
14  
15  
16  
17  
18  
19  
20  
21  
22  
23  
24  
25  
26  
27  
28  
29  
30  
31  
32  
33  
34  
35  
36  
37  
38  
39  
40  
41  
42  
43  
44  
45  
46  
47  
48  
49  
50  
51  
52  
53  
54  
55  
56  
57  
58  
59  
60

CD4 count within HIV-infected women. In developed countries, thrombocytopenia is generally infrequent in healthy asymptomatic HIV-infected patients, and is associated with very advanced HIV disease and co-morbidities [32]. However, thrombocytopenia has been shown to be one of the common hematological abnormalities in patients before HAART initiation in sub-Saharan countries [28]. Although HIV-infected women in our study were HAART-naïve, the majority were asymptomatic and few reported WHO stage IV illness, and as noted may not have had advanced HIV disease.

Our study has some limitations. It's [non-randomized](#) cross-sectional design makes it structurally impossible to determine temporal direction or causality [including inability of multivariate models to adjust for all confounding](#). Secondly, all participants in this study were women, and as hemoglobin levels differ between men and women, our findings cannot be extrapolated to men. Finally, the small number of women with WBC<2.0 [cells/mm<sup>3</sup>](#) resulted in inadequate power to assess predictors of neutropenia. It is possible, or even likely, that the large odds ratios for the associations of co-trimoxazole use (OR=5.69 CI=0.63, 51.45) and CD4 count<200 [cells/mm<sup>3</sup>](#) [cells/μl](#) (OR=7.18 CI=0.78, 65.82) with neutropenia would be significant with a larger sample size.

In conclusion, we observed high prevalence of anemia in HIV-infected and uninfected Rwandan women. Anemia was more common in the HIV-infected than uninfected women, especially those with greater disease progression as indicated by lower CD4 cell counts. Neutropenia and thrombocytopenia were more common in the HIV-infected than uninfected Rwandan women. As anemia and neutropenia are the most common hematologic abnormalities in HAART-naïve HIV-infected women, it is important to routinely assess these parameters for timely and adequate clinical management.

**Acknowledgements:**

We acknowledge RWISA participants for their valuable time and commitment, and particularly acknowledge all research staff for their contribution to this study.

**Funding sources:**

*All authors acknowledge support from the AIDS International Training and Research Program (Fogarty International Center, NIH D43-TW001403.) This study was supported by supplements from the National Institute of Allergy and Infectious Diseases to the Bronx/Manhattan Women's*



1  
2  
3  
4  
5  
6  
7  
8  
9  
10  
11  
12  
13  
14  
15  
16  
17  
18  
19  
20  
21  
22  
23  
24  
25  
26  
27  
28  
29  
30  
31  
32  
33  
34  
35  
36  
37  
38  
39  
40  
41  
42  
43  
44  
45  
46  
47  
48  
49  
50  
51  
52  
53  
54  
55  
56  
57  
58  
59  
60

Interagency HIV Study (WIHS), which is funded by the National Institute of Allergy and Infectious (U01-AI-35004). The study was also supported in part by the Center for AIDS Research of the Albert Einstein College of Medicine and Montefiore Medical Center funded by the National Institutes of Health (NIH AI-51519) and by the National Institute of Diabetes and Digestive and Kidney Disease (DK54615), and the Chicago WIHS (U01-AI-34993).

## References

1. Rudnicka D and Schwartz O. Intrusive HIV-1-infected cells. *Nat Immunol.* 2009;**10**: 933–34.
2. Anastos K, Shi Q, French A et al. Total Lymphocyte count, Hemoglobin and Delayed-Type Hypersensitivity as predictors of Death and AIDS Illness in HIV-1 Infected Women Receiving Highly Active Antiretroviral Therapy. *J Acquir Immune Defic Syndr.* 2004;**35**:383-92.
3. Steinman RM, Granelli-Piperno A, Pope M et al. The interaction of immunodeficiency viruses with dendritic cells. *Curr Top Microbiol Immunol.* 2003;**276**:1-30.
4. Lekkerkerker AN, van Kooyk Y, Geijtenbeek TB. Viral piracy: HIV-1 targets dendritic cells for transmission. *Curr HIV Res.* 2006;**4**:169-76.
5. Obirikorang C and Yeboah FA. Blood hemoglobin measurements as a predictive indicator for the progression of HIV/ AIDS in resource-limited setting. *J Biomed Sci.* 2009;**16**:102. doi:10.1186/1423-0127-16-102.
6. Ajayi AO, Ajayi EA, Fasakin KA. CD4+ T-lymphocytes cell counts in adults with human immunodeficiency virus infection at the medical department of a tertiary health institution in Nigeria. *Ann Afr Med.* 2009;**8**:257-60.
7. Coyle TE. Hematologic complications of human immunodeficiency virus infection and the acquired immunodeficiency syndrome. *Med Clin North Am.* 1997;**81**:449-70.
8. Abouafia DM, Mitsuyasu RT. Hematologic abnormalities in AIDS. *Hematol Oncol Clin North Am* 1991;**5**:195.
9. Mata-Marín JA, Gaytán-Martínez JE, Martínez-Martín RE et al. Risk factors and correlates for anemia in HIV treatment-naïve infected patients: a cross-sectional analytical study. *BMC Res Notes.* 2010;**3**:230.
10. Levine A, Karim R, Mack W et al. Neutropenia in human immunodeficiency virus infection: data from the Women's Interagency HIV Study. *Arch Intern Med.* 2006;**166**:405–10.
11. Miguez-Burbano MJ, Jackson J Jr, Hadrigan S. Thrombocytopenia in HIV disease: clinical relevance, physiopathology and management. *Curr Med Chem Cardiovasc Hematol Agents.* 2005;**3**:365-76.
12. Kirchhoff F, Silvestri G: Is Nef the elusive cause of HIV-associated hematopoietic dysfunction? *J Clin Invest* 2008;**118**:1622-25.
13. Dilksht B, Wanchu A, Sachdeva RK et al. Profile of hematological abnormalities of Indian HIV infected individuals. *BMC Blood Disorders* 2009;**9**:5.
14. Siegfried N, Uthaman OA, Rutherford GW. Optimal time for initiation of antiretroviral therapy in asymptomatic, HIV-infected, treatment-naïve adults. *Cochrane Database*

- 1  
2  
3  
4  
5  
6  
7  
8  
9  
10  
11  
12  
13  
14  
15  
16  
17  
18  
19  
20  
21  
22  
23  
24  
25  
26  
27  
28  
29  
30  
31  
32  
33  
34  
35  
36  
37  
38  
39  
40  
41  
42  
43  
44  
45  
46  
47  
48  
49  
50  
51  
52  
53  
54  
55  
56  
57  
58  
59  
60
- Syst Rev. 2010;**3**:CD008272.
15. Wisaksana R, Sumantri R, Indrati AR et al. Anemia and iron homeostasis in a cohort of HIV-infected patients in Indonesia. *BMC Infect Dis.* 2011;**11**:213.
16. Anastos K, Ndamage F, Lu D et al. Lipoprotein levels and cardiovascular risk in HIV infected and uninfected Rwandan women. *AIDS Res Ther.* 2010;**7**:34.
17. *World Health Organisation: Nutritional anemia: report of a WHO Scientific Group. Geneva, Switzerland: World Health Organisation; 1968.*
18. Levine AM, Berhane K, Masri-Lavine L et al. Prevalence and Correlates of Anemia in a Cohort of HIV-Infected Women: Women's Interagency HIV Study. *JAIDS.* 2001;**26**:28-35.
19. Laboratory values of clinical importance. In Petersdorf RG, Adams RD, Braunwald E, et al., eds. *Harrison's principles of internal medicine*, 10th ed. New York, McGraw-Hill, 1983:A-3.
20. Mugisha JO, Shafer LA, Van der Paal L et al. Anaemia in a rural Ugandan HIV cohort: prevalence at enrolment, incidence, diagnosis and associated factors. *Trop Med Int Health.* 2008;**13**:788-94.
21. Erhabor O, Ejele OA, Nwauche CA, Buseri FI. Some hematological parameters in Human Immunodeficiency Virus (HIV) infected Africans: the Nigerian Perspective. *Niger J Med.* 2005;**14**:33-8.
22. Mildvan D, Creagh T, Leitz G et al. Anemia Prevalence Study Group. Prevalence of anemia and correlation with biomarkers and specific antiretroviral regimens in 9690 humans-immunodeficiency-virus-infected patients: findings of the Anemia Prevalence Study. *Curr Med Res Opin.* 2007;**23**: 43-55.
23. Masaisa F, Gahutu JB, Mukibi J et al. Anemia in human immunodeficiency virus-infected and uninfected women in Rwanda. *Am J Trop Med Hyg.* 2011;**84**:456-60.
24. Ministry of Health (MOH) [Rwanda], National Institute of Statistics of Rwanda (NISR), and ICF Macro. 2009. *Rwanda Interim Demographic and Health Survey 2007-08.* Calverton, Maryland, U.S.A.: MOH, NISR, and ICF Macro.
25. Storz JF and Moriyama H. Mechanisms of Hemoglobin Adaptation to High Altitude Hypoxia. *High Alt Med Biol.* 2008;**9**:148-57.
26. Windsor J and Martin D. From mountain to bedside: understanding the clinical relevance of human acclimatization to high-altitude hypoxia. *Postgrad Med J.* 2008;**84**:622-27.
27. Saunders PU, Pyne DB and Gore CJ. Endurance Training at Altitude. *High Altitude Medicine & Biology.* 2008;**10**:135-48.
28. Firnhaber C, Smeaton L, Saukila N, Flanigan T, Gangakhedkar R, Kumwenda J et al. Comparisons of anemia, thrombocytopenia, and neutropenia at initiation of HIV antiretroviral therapy in Africa, Asia, and the Americas. *Int J Infect Dis.* 2010; **14**: e1088-e1092.
29. Kimura S, Matsuda J, Ikematsu S et al. Efficacy of recombinant human granulocyte colony-stimulating factor on neutropenia in patients with AIDS. *AIDS.* 1990;**4**:1251-55.

- 1  
2  
3  
4  
5  
6  
7  
8  
9  
10  
11  
12  
13  
14  
15  
16  
17  
18  
19  
20  
21  
22  
23  
24  
25  
26  
27  
28  
29  
30  
31  
32  
33  
34  
35  
36  
37  
38  
39  
40  
41  
42  
43  
44  
45  
46  
47  
48  
49  
50  
51  
52  
53  
54  
55  
56  
57  
58  
59  
60
30. Mauss S, Steinmetz HT, Willers R et al. Induction of granulocyte colony-stimulating factor by acute febrile infection but not by neutropenia in HIV seropositive individuals. *J Acquir Immune Defic Syndr Hum Retrovirol* 1997;**14**:430–34.
31. Toure S, Gabillard D, Inwoley A et al. Incidence of neutropenia in HIV-infected African adults receiving co-trimoxazole prophylaxis: a 6 year cohort study in Abidjan, CÔte D'Ivoire. *Trans R Soc Trop Med Hyg.* 2006;**100**:785–90.
32. Vannappagari V, Nkhoma ET, Atashili J et al. Prevalence, severity and duration of thrombocytopenia among HIV patients in the era of highly active antiretroviral therapy. *Platelets.* 2011;**22**:611-8.

Table 1: Socio-demographic and hematologic characteristics by HIV status and CD4 cell count

| Characteristics                                                      | AMONG ALL WOMEN N (%) |                      |        | AMONG HIV+ WOMEN ONLY N (%)         |                                         |                                      | p-value |
|----------------------------------------------------------------------|-----------------------|----------------------|--------|-------------------------------------|-----------------------------------------|--------------------------------------|---------|
|                                                                      | HIV-negative (N=226)  | HIV-positive (N=710) |        | HIV+ CD4>350 cells/ $\mu$ l (N=197) | HIV+ CD4 200-349 cells/ $\mu$ l (N=268) | HIV+ CD4 <200 cells/ $\mu$ l (N=245) |         |
| <b>Age/years N (%)</b>                                               |                       |                      |        |                                     |                                         |                                      |         |
| <30                                                                  | 34 (15%)              | 158 (22%)            | <0.001 | 51 (26%)                            | 50 (19%)                                | 57 (23%)                             | 0.35    |
| 30-40                                                                | 59 (26%)              | 393 (55%)            |        | 107 (54%)                           | 151 (56%)                               | 135 (55%)                            |         |
| 40+                                                                  | 133 (59%)             | 159 (22%)            |        | 39 (20%)                            | 67 (25%)                                | 53 (22%)                             |         |
| <b>Income (Rwf)</b>                                                  |                       |                      |        |                                     |                                         |                                      |         |
| <10,000                                                              | 92 (45%)              | 251 (36%)            | 0.02   | 66 (34%)                            | 98 (37%)                                | 87 (37%)                             | 0.41    |
| 10,000- 35,000                                                       | 79 (39%)              | 347 (50%)            |        | 105 (54%)                           | 131 (50%)                               | 111 (47%)                            |         |
| >35,000                                                              | 33 (16%)              | 97 (14%)             |        | 22 (11%)                            | 35 (13%)                                | 40 (17%)                             |         |
| <b>Level of education N (%)</b>                                      |                       |                      |        |                                     |                                         |                                      |         |
| No schooling                                                         | 67 (32%)              | 156 (22%)            | 0.02   | 46 (24%)                            | 58 (22%)                                | 52 (22%)                             | 0.89    |
| Some primary school                                                  | 69 (33%)              | 269 (38%)            |        | 78 (40%)                            | 99 (37%)                                | 92 (38%)                             |         |
| Secondary or University                                              | 76 (36%)              | 277 (39%)            |        | 71 (36%)                            | 110 (41%)                               | 96 (40%)                             |         |
| <b>Marital status N (%)</b>                                          |                       |                      |        |                                     |                                         |                                      |         |
| Legally married/partner                                              | 80 (38%)              | 256 (36%)            | 0.004  | 86 (44%)                            | 97 (36%)                                | 73 (30%)                             | 0.034   |
| Widowed                                                              | 108 (51%)             | 296 (42%)            |        | 71 (36%)                            | 118 (44%)                               | 107 (44%)                            |         |
| Other                                                                | 25 (12%)              | 153 (22%)            |        | 38 (19%)                            | 53 (20%)                                | 62 (26%)                             |         |
| <b>Body Mass Index (kg/m<sup>2</sup>)</b>                            |                       |                      |        |                                     |                                         |                                      |         |
| Mean $\pm$ SD                                                        | (21.3 $\pm$ 3.8%)     | (21.6 $\pm$ 3.9%)    | 0.22   | (21.9 $\pm$ 3.9%)                   | (21.9 $\pm$ 3.9%)                       | (21.1 $\pm$ 3.7%)                    | 0.15    |
| <b>Alcohol use N (%)</b>                                             | 56 (28%)              | 144 (21%)            | 0.04   | 39 (21%)                            | 53 (21%)                                | 52 (22%)                             | 0.98    |
| <b>Smoking N (%)</b>                                                 |                       |                      |        |                                     |                                         |                                      |         |
| Yes                                                                  | 7 (3%)                | 18 (3%)              | 0.58   | 4 (2%)                              | 7 (3%)                                  | 7 (3%)                               | 0.86    |
| <b>WHO stage 4 N (%)</b>                                             |                       |                      |        |                                     |                                         |                                      |         |
| Yes                                                                  | Not applicable        | 288 (41%)            |        | 59 (30%)                            | 105 (39%)                               | 124 (51%)                            | <0.001  |
| <b>Co-trimoxazole/Dapsone use in prior year N (%)</b>                |                       |                      |        |                                     |                                         |                                      |         |
| Yes                                                                  | 41 (19%)              | 612 (87%)            | <0.001 | 145 (75%)                           | 247 (92%)                               | 220 (91%)                            | <0.001  |
| <b>Employed N (%)</b>                                                |                       |                      |        |                                     |                                         |                                      |         |
| Yes                                                                  | 51 (25%)              | 171 (25%)            | 0.99   | 50 (26%)                            | 63 (24%)                                | 58 (25%)                             | 0.84    |
| <b>Hemoglobin (g/dl.)</b>                                            |                       |                      |        |                                     |                                         |                                      |         |
| N                                                                    | 223                   | 669                  | <0.001 | 180                                 | 251                                     | 238                                  | <0.001  |
| Mean $\pm$ SD                                                        | 14.3 $\pm$ 1.4        | 13.1 $\pm$ 1.6       |        | 13.5 $\pm$ 1.3                      | 13.1 $\pm$ 1.7                          | 12.7 $\pm$ 1.7                       |         |
| <b>Anemia N (%)</b>                                                  | 14 (6.3%)             | 137 (20.5%)          |        | 15 (7.6%)                           | 43 (16.0%)                              | 79 (32.2%)                           | <0.001  |
| <b>Marked anemia N (%)</b>                                           | 0                     | 28 (4.2%)            | <0.001 | 4 (1.1%)                            | 6 (2.4%)                                | 20 (8.4%)                            | <0.001  |
| <b>White blood cell count, X 10<sup>3</sup> cells/mm<sup>3</sup></b> |                       |                      |        |                                     |                                         |                                      |         |
| N                                                                    | 223                   | 670                  |        | 181                                 | 251                                     | 238                                  |         |
| Mean $\pm$ SD                                                        | 4.5 $\pm$ 1.4         | 3.7 $\pm$ 1.4        | <0.001 | 4.3 $\pm$ 1.6                       | 3.8 $\pm$ 1.3                           | 3.3 $\pm$ 1.4                        | <0.001  |
| <b>Neutropenia N (%)</b>                                             |                       |                      |        |                                     |                                         |                                      |         |
| <2000 cells/mm <sup>3</sup>                                          | 1 (0.45%)             | 28 (4.2%)            | 0.006  | 2 (1.1%)                            | 6 (2.4%)                                | 20 (8.4%)                            | <0.001  |
| <1000 cells/mm <sup>3</sup>                                          | 1 (0.45%)             | 1 (0.15%)            |        |                                     |                                         |                                      |         |
| <b>Platelet count (X10<sup>3</sup>/mm<sup>3</sup>)</b>               |                       |                      |        |                                     |                                         |                                      |         |
| N                                                                    | 208                   | 654                  | 0.05   | 179                                 | 246                                     | 229                                  | 0.55    |
| Mean $\pm$ SD                                                        | 231.8 $\pm$ 84.5      | 223.2 $\pm$ 109.0    |        | 225.9 $\pm$ 106.7                   | 222.9 $\pm$ 109.9                       | 221.4 $\pm$ 110.3                    |         |
| <b>Thrombocytopenia</b>                                              | 18 (8.6%)             | 88 (13.5%)           | 0.0547 | 24 (13.4%)                          | 36 (14.6%)                              | 31 (13.5%)                           | 0.92    |

SD=Standard Deviation; WHO=World Health Organization; Anemia is defined as hemoglobin<12.0 g/dL; Marked anemia is defined as hemoglobin<10.0 g/dL; Thrombocytopenia is defined as platelet counts <125.0 X 10<sup>3</sup> /mm<sup>3</sup>. The HIV+ and HIV- women were compared using chi-square (X<sup>2</sup>) test, and similarly CD4+ cell count categories within HIV+ women were compared the X<sup>2</sup> test. Rwf=Rwandan Francs

**Table 2.A: Logistic Regression Analyses for modeling anemia, Hemoglobin (g/dl) <12 vs ≥ 12.**

| Variable                              | Univariate Model   |         | Multivariate Model <sup>1</sup> |         |
|---------------------------------------|--------------------|---------|---------------------------------|---------|
|                                       | OR (95% C.I.)      | p-value | OR (95% C.I.)                   | p-value |
| HIV status, HIV+ vs. HIV-             | 3.84 (2.17, 6.82)  | <0.001  | NA <sup>2</sup>                 |         |
| HIV+, CD4 >350 vs. HIV-               | 1.27 (0.59, 2.75)  | 0.54    | 1.47 (0.68, 3.21)               | 0.33    |
| HIV+, CD4 200-350 vs. HIV-            | 3.09 (1.64, 5.81)  | <0.001  | 3.59 (1.88, 6.83)               | <0.001  |
| HIV+, CD4 < 200 vs. HIV-              | 7.42 (4.05, 13.58) | <0.001  | 8.09 (4.37, 14.97)              | <0.001  |
| Age (years), 30-40 vs. <30            | 0.84 (0.54, 1.31)  | 0.44    |                                 |         |
| Age (years), 40+ vs. <30              | 0.65 (0.40, 1.06)  | 0.08    |                                 |         |
| 10-35k Rwf vs. < 10k                  | 0.67(0.46, 0.98)   | 0.04    | 0.68 (0.45, 1.03)               | 0.07    |
| >35k Rwf vs. < 10k                    | 0.80 (0.47,1.38)   | 0.43    | 0.94 (0.52, 1.70)               | 0.85    |
| Some primary school                   | 0.96 (0.61, 1.51)  | 0.87    |                                 |         |
| Secondary or university               | 1.00 (0.65,1.56)   | 0.98    |                                 |         |
| BMI (per kg/m <sup>2</sup> ) Per unit | 0.87 (0.82, 0.92)  | <0.001  | 0.87 (0.82, 0.93)               | <0.001  |
| Alcohol 1-4 drinks/week               | 0.97 (0.42, 2.25)  | 0.95    |                                 |         |
| Alcohol > 4 drinks/week               | 1.09 (0.68, 1.75)  | 0.71    |                                 |         |
| Co-trimoxazole or dapsone use         | 2.45 (1.54, 3.89)  | 0.0002  |                                 |         |
| WHO stage 4 illness<br>Yes vs. No     | 2.40 (1.68, 3.43)  | <0.001  |                                 |         |
| Widowed vs. married/ partner          | 0.99 (0.67, 1.47)  | 0.96    |                                 |         |
| Other vs. married/ partner            | 1.29 (0.80, 2.07)  | 0.30    |                                 |         |
| Smoking vs. not smoking               | 0.98 (0.33, 2.92)  | 0.98    |                                 |         |
| Employed vs. not employed             | 1.07 (0.71, 1.63)  | 0.73    |                                 |         |

1. By Stepwise selection with overall p=0.05 to enter and p=0.10 to remain for the entire variable. Only the variables selected into the final model are included in the Table; 2.HIV+ status was fit into the multivariate model by CD4 category with HIV- as baseline.

Table 2.B: Logistic Regression Analyses for modeling neutropenia WBC (cells/mm<sup>3</sup>) <2000 vs ≥ 2000

| Variable                              | Univariate Model    |         | Multivariate Model <sup>1,2</sup> |         |
|---------------------------------------|---------------------|---------|-----------------------------------|---------|
|                                       | OR (95% C.I.)       | p-value | OR (95% C.I.)                     | p-value |
| HIV status, HIV+ vs. HIV-             | 9.68 (1.31, 71.58)  | 0.03    | NA <sup>2</sup>                   |         |
| HIV+, CD4 >350 vs. HIV-               | 2.51 (0.23, 27.89)  | 0.45    | 1.03 (0.08, 13.15)                | 0.98    |
| HIV+, CD4 200-350 vs. HIV-            | 5.44 (0.68, 45.51)  | 0.12    | 1.86 (0.78, 65.82)                | 0.60    |
| HIV+, CD4 < 200 vs. HIV-              | 20.37 (2.71, 153.1) | 0.003   | 7.18 (0.78, 65.82)                | 0.08    |
| Age (years), 30-40 vs. <30            | 0.77 (0.33, 1.77)   | 0.54    |                                   |         |
| Age (years), 40+ vs. <30              | 0.28 (0.08, 0.92)   | 0.04    |                                   |         |
| 10-35k Rwf vs. < 10k                  | 1.07 (0.47, 2.42)   | 0.87    |                                   |         |
| >35k Rwf vs. < 10k                    | 1.41 (0.48, 4.14)   | 0.53    |                                   |         |
| Some primary school                   | 1.05 (0.39, 2.80)   | 0.92    |                                   |         |
| Secondary or university               | 1.20 (0.46, 3.09)   | 0.71    |                                   |         |
| BMI (per kg/m <sup>2</sup> ) Per unit | 0.96 (0.86, 1.06)   | 0.40    |                                   |         |
| Alcohol 1-4 drinks/week               | 0.71 (0.09, 5.43)   | 0.74    |                                   |         |
| Alcohol > 4 drinks/week               | 1.07 (0.40, 2.89)   | 0.89    |                                   |         |
| WHO stage 4 illness Yes vs. No        | 3.36 (1.57, 7.21)   | 0.002   |                                   |         |
| Co-trimoxazole or dapsone use         | 12.18 (1.65, 90.0)  | 0.014   | 5.69 (0.63, 52.5)                 | 0.12    |
| Widowed vs married/ partner           | 1.15 (0.50, 2.66)   | 0.74    |                                   |         |
| Other vs married/ partner             | 1.19 (0.43, 3.34)   | 0.74    |                                   |         |
| Smoking vs. not smoking               | 1.28 (0.17, 9.83)   | 0.81    |                                   |         |
| Employed vs. not employed             | 0.36 (0.11, 1.22)   | 0.10    |                                   |         |

1. By Stepwise selection with overall p=0.05 to enter and p=0.10 to remain for the entire variable. Only the variables selected into the final model are included in the Table; 2. HIV+ status was fit into the multivariate model by CD4 category with HIV- as baseline

**Table 2.C: Logistic Regression Analyses for thrombocytopenia, platelets (mm<sup>3</sup>) <125 vs ≥ 125.**

| Variable                              | Univariate Model  |         | Multivariate Model <sup>1</sup> |         |
|---------------------------------------|-------------------|---------|---------------------------------|---------|
|                                       | OR (95% C.I.)     | p-value | OR (95% C.I.)                   | p-value |
| HIV status, HIV+ vs. HIV-             | 1.64 (0.96, 2.80) | 0.07    | NA <sup>2</sup>                 |         |
| HIV+, CD4 >350 vs. HIV-               | 1.66 (0.87, 3.16) | 0.13    | 2.18 (1.10, 4.32)               | 0.03    |
| HIV+, CD4 200-350 vs. HIV-            | 1.81 (0.99, 3.29) | 0.05    | 2.36 (1.25, 4.45)               | 0.008   |
| HIV+, CD4 < 200 vs. HIV-              | 1.47 (0.79, 2.75) | 0.23    | 1.95 (1.01, 3.79)               | 0.05    |
| Age (years), 30-40 vs. <30            | 1.33 (0.74, 2.37) | 0.34    | 1.29 (0.72, 2.33)               | 0.40    |
| Age (years), 40+ vs. <30              | 1.61 (0.88, 2.95) | 0.12    | 2.32 (1.20, 4.50)               | 0.01    |
| 10-35k Rwf vs. < 10k                  | 0.89 (0.58, 1.38) | 0.61    |                                 |         |
| >35k Rwf vs. < 10k                    | 0.74 (0.38, 1.45) | 0.38    |                                 |         |
| Some primary school                   | 0.66 (0.40, 1.11) | 0.12    |                                 |         |
| Secondary or university               | 0.77 (0.47, 1.26) | 0.29    |                                 |         |
| BMI (per kg/m <sup>2</sup> ) Per unit | 0.96 (0.90, 1.01) | 0.12    | 0.95 (0.89, 1.00)               | 0.06    |
| Alcohol 1-4 drinks/week               | 0.17 (0.02, 1.22) | 0.08    |                                 |         |
| Alcohol > 4 drinks/week               | 0.87 (0.49, 1.53) | 0.62    |                                 |         |
| WHO stage 4 illness vs. No            | 0.78 (0.50, 1.22) | 0.28    |                                 |         |
| Co-trimoxazole or dapsone use         | 1.10 (0.69, 1.74) | 0.69    |                                 |         |
| Widowed vs. married/ partner          | 0.63 (0.40, 0.98) | 0.04    | 0.49 (0.29, 0.80)               | 0.005   |
| Other vs. married/ partner            | 0.62 (0.34, 1.10) | 0.10    | 0.59 (0.32, 1.07)               | 0.08    |
| Smoking vs. not smoking               | 0.71 (0.16, 3.09) | 0.65    |                                 |         |
| Employed vs. not employed             | 1.15 (0.71, 1.86) | 0.57    |                                 |         |

1. By Stepwise selection with overall p=0.05 to enter and p=0.10 to remain for the entire variable. Only the variables selected into the final model are included in the Table; 2. HIV+ status was fit into the multivariate model by CD4 category with HIV- as baseline.



**Table 3: Prevalence of anemia, neutropenia and thrombocytopenia in HIV-infected women in 5 studies**

| Study (N)                                    | Anemia  |         |         | Neutropenia |          | Thrombocytopenia  |
|----------------------------------------------|---------|---------|---------|-------------|----------|-------------------|
|                                              | Hb<12.0 | Hb<11.0 | Hb<10.0 | WBC<2000    | WBC<1000 | Platelets<125,000 |
| RWISA (710)<br>[Rwanda]                      | 20.3%   |         | 4.9%    | 4.2%        | 0.1%     | 13.5%             |
| WIHS* (2059)<br>[North America]              | 37.0%   |         | 7.2%    | 44%         | 7%       | 14.6%             |
| Uganda** (123)                               |         | 23.6%   |         |             |          |                   |
| APS*** (2197)<br>[North America]             | 32.3%   |         | 6.8%    |             |          |                   |
| PEARLS****<br>[Africa, Asia<br>and Americas] |         |         |         |             | ~15%     |                   |

\*WIHS=Women's Interagency HIV Study<sup>10, 18</sup>; \*\*Uganda<sup>20</sup>; \*\*\*APS=Anemia Prevalence Study<sup>22</sup>; \*\*\*\*PEARLS=Prospective Evaluation of ART in Resource Limited Settings<sup>28</sup>



Kigali, September 26<sup>th</sup>, 2012  
Ref. N<sup>o</sup>: NRL/2012

A Healthy People. A Wealthy Nation

**National Reference Laboratory (NRL) Division**

Mr. Richards Sands  
The Managing Editor, BMJ Open  
[rsands@bmjgroup.com](mailto:rsands@bmjgroup.com)

Dear Editor:

We thank you and the reviewers for the careful and complete review of our revised manuscript. I am attaching a further revised manuscript and our responses to the reviewer's comments below.

When making the changes to the review we noticed that we had modeled age as a continuous variable in Table 2 while it had been categorical in Table 1. We believe that it is important to be consistent and the categorical was more correct so we have changed age to categorical in Table 2, which resulted in changes to coefficients of other variables in the multivariate model for thrombocytopenia Table 2c. We apologize for not having noticed this problem earlier.

**Reviewer comment:**

*Limitations of the study should include that because comparisons were not made between/among randomized groups, that observed differences attributed to either HIV status, CD4 cell count, (or the combination), could be partially attributable to other, confounding factors, measured or unknown.*

**Response:** We agree this is a limitation as is true with all observational studies and now note this (lines 354-355). However, while this may not have been apparent, we did undertake multivariate modeling to adjust for potential confounding. We have split Table 2 into Tables 2A, 2B, 2C with each table presenting univariate and multivariate models for anemia, neutropenia and thrombocytopenia respectively to make this point clearer.

**Reviewer comment:**

*For example, the age distribution between HIV+ and HIV- women was significantly different. What was the association for anemia by HIV status before and after controlling for this potential confounder? It is not clear the modeling process and results presented here address this question.*

**Response:** We do agree that the general univariate results should have been presented along with the multivariate analyses in Table 2, and we have now broken Table 2 into three tables (Table 2A, 2B, 2C) to do this. We hope that the reviewer will find the presentation of the univariate analyses in Tables 2A, 2B and 2C to be informative and sufficient.

**Reviewer comments:**

*Exploration for effect modifiers may be performed one at a time to prevent problems with model fitting when there are many potential co-variates. Assessment for effect modification need not use p-values (rather focusing on the relative parameter estimate difference between models). Moreover, any presentation of multi-variable modeling should include uni-variable modeling results as well for comparison.*

*There are ways to explore for effect modification that do not introduce either technical modeling problems (e.g. explore one at a time), or type 1 error (by focusing on the magnitude of effect modification on the parameter estimate, rather than a p-value).*

**Response:** We prefer to distinguish between "effect modification" and confounding. Effect modification means that the relationship differs by level of age (for example if HIV/low CD4 were positively associated with neutropenia for women <30 years of age and at the same time protective against neutropenia for women over 30 years old). We do not see a biological basis nor are we aware of evidence in the literature for such a possibility (effect modification) for any combination of our variables. If the reviewer was referring to confounding rather than effect modification then we do hope that the inclusion of univariate and multivariate models in Tables 2A, 2B and 2C addresses this concern. We have also added some text to the Results section of the manuscript (page 7, lines 240-242) to describe the added analyses including the potential impact of age differences.

Age was not a strong confounder as it did not enter the final models for hemoglobin (Table 2A) or neutropenia (Table 2B) and in fact did not have a strong unadjusted association with hemoglobin ( $p=0.44$ ). While age did enter the final multivariate model for platelets (Table 2C) this did not result in a substantial change in the point estimate for the association (Odds ratio) for the association of HIV / CD4 with platelets.

However, if the reviewer did mean "Effect Modification" the way we understood it, we believe that going one by one through 10 choose 2 = 45 possible combinations of variables x 3 outcomes searching for effect modification without such apriori evidence for this as noted above or arbitrarily selecting which combination to use would lead to inflation of Type-1 error as noted in our previous response. Thus numerous books warn against data driven examination of effect modification<sup>1-7</sup>. For example, looking at 45 combinations in each model at  $P = 0.05$  would lead to an expected 2.5 positive results by chance alone. If we were to abandon p-values when making a determination it could be even worse. In addition, once we start looking at combinations of factors for effect modification, small cell size issues arise where there will be very few observations in some factor combination cells all of which have the same outcome. This will send the parameter estimate in the logistic model to  $\pm\infty$  and make the model unstable<sup>5</sup>. It also creates other problems with collinearity that can destabilize estimates<sup>6</sup>. Other fallacies of examination of effect modification occur from logistic models if the underlying association is not multiplicative in the odds ratio<sup>7</sup>.

1. Schlesselman J. Case Control Studies Design, Conduct and Analysis Oxford University Press, New York NY 1982.
2. Kelsley JL, Thompson Wd Evans AS. Methods in Observational Epidemiology Oxford University Press, New York NY 1986.
3. Kahn HA, Sempos CT. Statistical Methods in Epidemiology Oxford University Press, New York NY 1989.
4. Rothman KJ, Greenland S. Modern Epidemiology, Second Edition, Maple Press York PA 1998.
5. Hosmer DW, Lemeshow S. Applied Logistic Regression John Wiley & Sons New York, NY 2000
6. Kleinbaum DG, Kupper LL, Morgenstern. Epidemiologic Research Principles and Quantitative Methods, Van Norstrand Reinhard, New York 1982.
7. Szklo M Nieto JF. Epidemiology Beyond the Basics Jones and Bartlett Publishers Boston MA 2004.

**Reviewer comment:**

*The answer to the first review regarding potential confounders is not sufficient.*

**Response:**

We agree and hope that the inclusion of the univariate models in Tables 2A, 2B and 2C as described above addresses those concerns.

**Reviewer comment:**

*A scientific justification from literature is not needed, just evidence within the cohort (which was observed), that groups being compared were not similar on important potential confounding factors (like age). I focus on age as there is literature suggesting an association between female age and anemia (via menstruation). Therefore, this would be one factor to definitely investigate. Was the association between HIV groups and anemia similar before and after controlling for age?*

**Response:**

We thank the reviewer for pointing out the need for clarity on this point. We have added a sentence to the results section, lines 240-242, indicating that the associations of anemia with HIV serostatus and CD4 count were similar after adjusting for age: "It should be noted that despite the differences in age between HIV+ and HIV- women noted in Table 1, age was not associated with our hematological outcomes of interest or otherwise did not impact the association of HIV with these outcomes."

Again, we thank the editor and reviewer for their time and commitment.

Sincerely,

-----  
Elizaphane Munyazesa, MSc  
e-mail: [munyazesa@hotmail.com](mailto:munyazesa@hotmail.com)  
Phone: +250 0783069554
